# Supplementary material for: Future-Proofing China's Rivers: Balancing Nitrogen Emission Standards Amidst Climate Change
Source: Research Square preprint supplement (doi:10.21203/rs.3.rs-5257861/v1), 2024-11-28
Supplement: Supplementary file 1 [file 254ec70da39d09dd7f58b4b9.docx]

**Supplementary Material A**

**Data source, calculation process and analysis results**

**Contents**

[SA 1. Experiment and data acquisition 1](#_Toc179477678)

[SA 2. Extract the model data 7](#_Toc179477679)

[SA 3. Data set screening and feature engineering 7](#_Toc179477680)

[SA 4. ML methods are used for feature decomposition 9](#_Toc179477681)

[SA 5. Nitrogen predicted according to the training set 11](#_Toc179477682)

[Appendix 1 12](#_Toc179477683)

[Appendix 2 160](#_Toc179477684)

The abundance of data mentioned in the supporting material was presented in the **Supplementary Material B**. For the tables mentioned as Table SB, please refer to this Excel worksheet.

# SA 1. Experiment and data acquisition

**Sampling area description**

The sampling sites for data acquisition are a total of 1702 national control points in China, which are divided into ten river basins, as shown in **Figure SA1**.

**Yangtze River Basin:** The Yangtze River Basin has numerous main tributaries. The larger ones include the Yalong River, Min River, Jialing River, Wu River, Xiang River, Yuan River, Han River, and Gan River, with each having a drainage area above 80,000 square kilometers. Besides, there are many other tributaries. The main stream is approximately 6,300 kilometers long, being the longest river in China and the third longest in the world. The total drainage area is about 1.8 million square kilometers, accounting for 18.8% of China's land area. The average annual runoff is around 951.3 billion cubic meters, indicating extremely abundant water resources. The basin spans the three major economic zones of eastern, central, and western China, flowing through 11 provinces, autonomous regions, and municipalities directly under the central government, namely Qinghai, Tibet, Sichuan, Yunnan, Chongqing, Hubei, Hunan, Jiangxi, Anhui, Jiangsu, and Shanghai. The terrain is complex and diverse, incorporating various landforms such as the Qinghai-Tibet Plateau, Hengduan Mountains, Yunnan-Guizhou Plateau, Sichuan Basin, and the middle and lower reaches of the Yangtze River Plain. The types of underlying surface are rich, including mountains, canyons, hills, plains, lakes, and swamps. Moreover, the water network is dense, and there are many lakes, for example, the four major freshwater lakes, Dongting Lake, Poyang Lake, Chaohu Lake, and Taihu Lake, are all situated in this basin.

**Yellow River Basin:** The main tributaries of the Yellow River are the Bai River, Hei River, Huangshui River, Zuli River, Qingshui River, Dahei River, Kuye River, Wuding River, Fen River, Wei River, Luo River, Qin River, and Dawen River. The total length is about 5,464 kilometers, making it the second longest river in China. The drainage area is approximately 795,000 square kilometers (including 42,000 square kilometers of the Ordos inland drainage area). The average annual runoff is about 66.1 billion cubic meters. The Yellow River originates from the northern foot of Bayan Har Mountain on the Qinghai-Tibet Plateau and flows through nine provinces and autonomous regions, including Qinghai, Sichuan, Gansu, Ningxia, Inner Mongolia, Shanxi, Shaanxi, Henan, and Shandong, finally emptying into the Bohai Sea. There are plateaus, mountains, hills, and plains in the basin. The upstream area has a relatively high terrain, mostly consisting of plateaus and mountains; the middle reaches area is the Loess Plateau with severe soil erosion; the downstream area is the North China Plain with a relatively flat terrain.

**Pearl River Basin:** It consists of four river systems, namely the Xijiang River, Beijiang River, Dongjiang River, and the rivers in the Pearl River Delta. The main tributaries include the Nanpan River, Hongshui River, Qianjiang River, Xunjiang River, Beipan River, Liujiang River, Yujiang River, Guijiang River, and Hejiang River. The total length of the Pearl River's main stream is about 2,215.8 kilometers. The drainage area is around 452,600 square kilometers (a very small part of which is in Vietnam). The average annual runoff is about 333.8 billion cubic meters, second only to the Yangtze River. It is distributed in six provinces (autonomous regions) in China, namely Yunnan, Guizhou, Guangxi, Guangdong, Hunan, and Jiangxi, and the northeast of the Socialist Republic of Vietnam. The basin is mostly mountainous and hilly terrain, and there are also some plains and basins, such as the Pearl River Delta Plain.

**Heilongjiang River Basin:** The main tributaries are the Nen River, Hulan River, Mudan River, Tangwang River, Woken River, and Lalin River. Generally, the westward-flowing Songhua River from the southern source is regarded as the main source, and the Nen River from the northern source is a tributary. The southern source is about 1,927 kilometers long. The drainage area is approximately 557,200 square kilometers. The average annual runoff is about 79.8 billion cubic meters. The Songhua River flows through Jilin and Heilongjiang provinces and covers the four northeastern provinces of Heilongjiang, Jilin, Liaoning, and Inner Mongolia. There are vast plains and fertile land in the basin, such as the Sanjiang Plain and the Songnen Plain, making it an important agricultural area and forestry base in China.

**Haihe River Basin:** The Haihe River system is composed of the Zhangwei River, Ziya River, Daqing River, Yongding River, Chaobai River, North Canal, Jiyun Canal, etc., and also includes plain drainage channels such as the Tuhai River and Majia River. The main stream of the Haihe River is only 73 kilometers long, but there are many tributaries. The total drainage area is about 318,000 square kilometers (including 264,000 square kilometers of the Haihe River system and 54,000 square kilometers of the Luanhe River system). The average annual runoff is about 22.8 billion cubic meters. It is located in North China, flowing through Beijing, Tianjin, and most of Hebei Province, as well as parts of Shanxi, Shandong, Henan, Liaoning, and Inner Mongolia Autonomous Region. There are mountains, plains, and hills in the basin. The transition zone between mountains and plains is short. The general trend of the plain terrain is to incline from southwest, west, and north to the Bohai Bay near Tianjin.

**Huaihe River Basin:** The main tributaries on the south bank include the Shiguan River and Pi River; the main tributaries on the north bank include the Hongru River, Shaying River, Guo River, Hui River, Xinbian River, and Suixi River. The main stream is about 1,000 kilometers long. The drainage area is about 270,000 square kilometers, of which the Huaihe River system is 190,000 square kilometers and the Yishusi River system is 80,000 square kilometers. The average annual runoff is about 62.2 billion cubic meters. It is located between the Yangtze River and the Yellow River, flowing through Henan, Anhui, and Jiangsu provinces. The terrain in the basin is mainly plain, with some hills and mountains. It is one of the important grain-producing areas in China.

**Liaohe River Basin:** The whole basin is composed of two river systems. The east and west Liaohe Rivers converge at Fudedian to form the main stream of the Liaohe River. Another river system is that the Hunhe River and Taizi River converge at Sanchahe and then flow into the sea through the Daliao River from Yingkou. The main stream of the Liaohe River is 516 kilometers long, and the Daliao River is 94 kilometers long. The total drainage area is about 219,000 square kilometers. The average annual runoff in the basin is relatively small, and the water resources are relatively scarce. It originates from Hebei Province and flows through Inner Mongolia Autonomous Region, Jilin Province, and Liaoning Province. There are mountains, hills, and plains in the basin. The middle and lower reaches are important industrial and agricultural areas.

**River Basins in Northwest China:** This basin refers to the inland river basins in northwest China, including some rivers in Xinjiang, Gansu, Qinghai, and other places. Due to the large number and dispersion of rivers in this basin, it is difficult to simply summarize specific information such as its main tributaries and river length. The drainage area is relatively extensive, but the specific data varies due to different statistical calibers. Generally, the rainfall is relatively less, and the average annual runoff is much lower than that of the eastern basins. It mainly flows through arid and semi-arid areas. The underlying surface is mostly deserts, gobi deserts, grasslands, etc. The water resources are in short supply, and the ecological environment is relatively fragile.

**River Basins in Southwest China:** It mainly includes some rivers in Yunnan, Guizhou, Guangxi, and other places, such as the Lancang River. The terrain in this basin is complex, with many rivers and large drops. Taking the Lancang River as an example, its main tributaries include the Ziqu River, Angqu River, etc. The Lancang River is about 2,139 kilometers long within China. The drainage area is about 811,000 square kilometers. The water volume is relatively abundant. The areas through which it flows have large terrain undulations, including landforms such as high mountains and canyons, plateaus, and basins. The types of underlying surface are diverse, including forests, grasslands, mountains, etc.

**River Basins in Southeast China:** It is mainly some rivers located in the southeast coastal areas, such as the Min River. Taking the Min River as an example, its main tributaries include the Youxi River, Gutianxi River, and Dazhangxi River. The Min River is about 562 kilometers long. The drainage area is about more than 60,000 square kilometers. There is abundant precipitation and a relatively large average annual runoff. The areas through which it flows are mostly hilly, mountainous, and coastal plains. The water and heat conditions are good, and the vegetation coverage is relatively high.


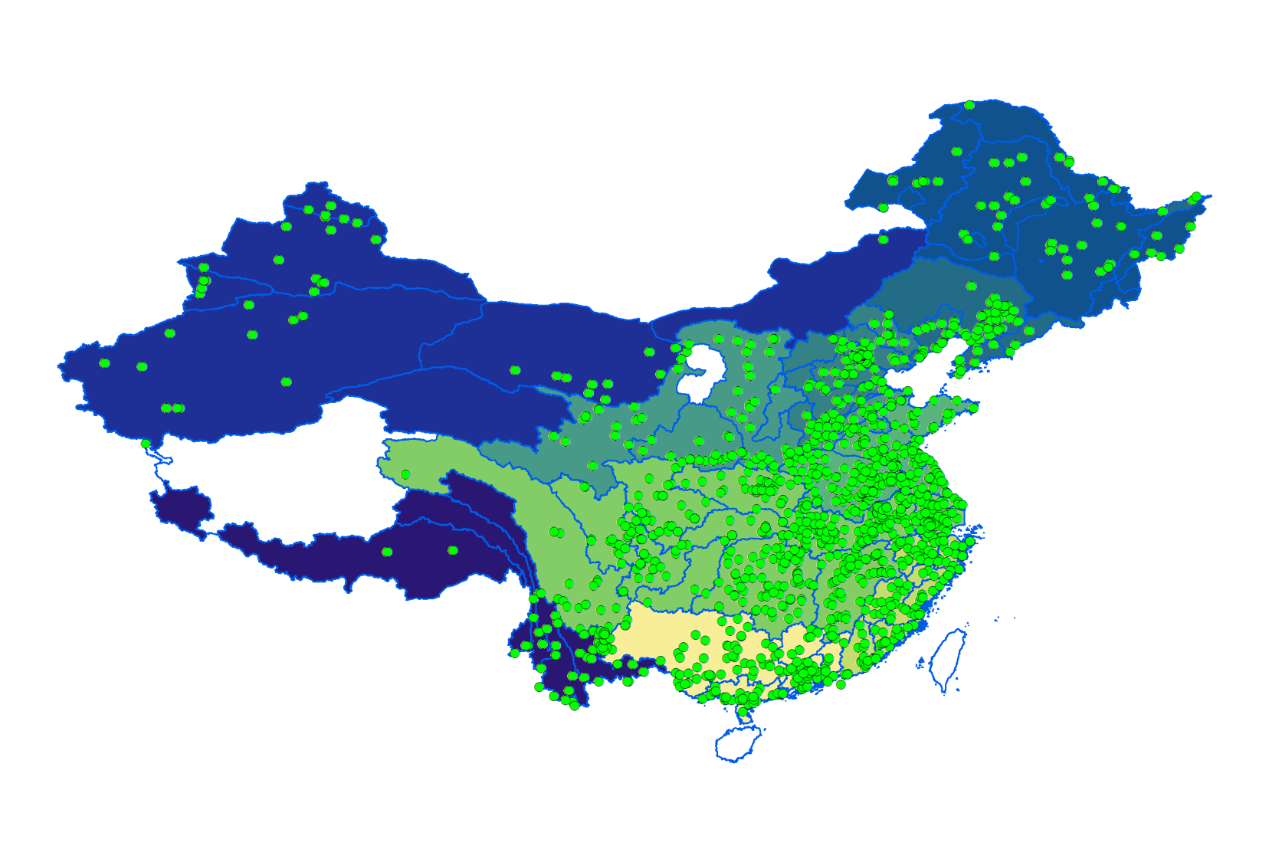


**Figure SA1** Location and affiliated river basin of sampling sites.

**Collection specification and detection limit of samples**

Water samples were collected at every month’s intervals between January 2015 and Jun 2024 with the assumption that the sediment quality is stable each month. The samples collected from each location consist of 4 to 5 composite samples. They are collected at different times during the current month, and their mid-month values will be used for modeling samples. Composite water samples were collected using a cylindrical water sampler. On site quick inspection items requiring on-site inspection, such as temperature, dissolved oxygen, and pH value. After sampling, the water will be filtered and sealed in clean polyethylene plastic bottle, placed in a cooler at 4 ℃, and transported to laboratory immediately for further analysis.

**Ship use method:** When sampling, the ship with appropriate tonnage should be selected according to the sampling time and the level of wind and waves; the sampling ship should be located downstream of the sampling point to collect water samples against the current to avoid water sample pollution caused by stirring bottom sediments. Samplers should collect water samples at the front of the ship to keep the sampler away from the hull as far as possible. If the ship cannot maintain static conditions, the samples should be settled immediately after returning to shore.

**Sampling method:** a) When stratified sampling in the same monitoring section, it should be carried out from top to bottom to avoid the disturbance of different levels of water. b) Except for the monitoring items with special requirements of the standard analysis method, samplers, static containers, and sample bottles should be washed with water samples 2 or 3 times before use. c) Do not stir the bottom sediment during sampling. Except for the monitoring items with special requirements of the standard analysis method, the collected water samples are poured into the static container to ensure a sufficient duration of 30 min. When standing naturally, use a dustproof cover to avoid dust pollution. d) Use a siphon device to take water samples without settling solids in the upper layer and move them into the sample bottle, and the water inlet tip of the siphon device should be kept below 50 mm on the surface of the water sample. e) If the collected water samples contain obvious algae, all the water samples can be passed through a filter with an aperture of 63 μm and poured into a static container. After ensuring sufficient dosage, the water samples can be left to stand for 30 minutes, and the upper water samples can be taken with a siphon, transferred to the sample bottle, and immediately added with preservatives.

**Sampling quality control:** a) A blank background sampling test is carried out on the cleaned sampling apparatus before sampling, where at least 3% is extracted from each sampling batch, and the test result should be lower than the detection limit of the method or the limit specified by the method. b) At least one blank sample of each sampling batch is collected and sent to the laboratory for analysis together with the water sample. The blank test value should meet the requirements of the standard analysis method. c) For uniform samples, where parallel double samples can be used for monitoring projects, field parallel samples should be collected, and at least one field parallel sample should be collected for each sampling batch. With reference to the determination requirements of the relative deviation of parallel samples in the standard analysis method, if there is a great difference in the determination results of parallel samples in the field, we should find out the reason and resample if necessary.

**Analysis and testing of samples:** The methods of field test and laboratory analysis were selected in **Table SA2**.

**Table SA2.** Measurement criteria for experimental items

| Index | Analysis methods | Minimum Detection  (mg L–1) |
| --- | --- | --- |
| Temp | Thermometer method (GB 13195-91) |  |
| W. Temp | Thermometer method (GB 13195-91) |  |
| pH | Glass electrode method (GB/T 27756-2011) |  |
| NH3 | Distillation and titration method (ISO 5664-1984) | 0.01 |
| NO3– | Ion-chromatography (ISO 10304-1-2007) | 0.08 |

# SA 2. Extract the model data

**Climate variables and human activity variables dataset**

The model data set is searched in CMIP6 according to the information in **Extended table 1**. The specific model output information can be found in **Appendix 1**.

# SA 3. Data set screening and feature engineering

From a geochemical perspective, the distribution of nitrogen and other indicators on a single cross-section is typically normal. This study utilizes the outlier identification method for data processing. During the Outlier recognition process, only the peak data with the lowest average value while being closest to the background value is retained for calculating the regional environment background value. This method aims to extract the most prevalent parts of the dataset in order to determine overall pollution levels for a specific cross-section. By eliminating outliers, the distribution range of the separated dataset becomes more concentrated, potentially reducing regional differences among the sub-datasets of samples within the separated data subsets.

We hope that the subset of data extracted after removing outliers can adequately represent regional spatial differences. Nevertheless, due to limited data resources and technical capabilities, it is inevitable that research bias will influence the resulting dataset. Intuitively, imbalances in data sampling from different sources can introduce representational errors that may impact the validity of the dataset obtained.

To verify the heterogeneity between sub-datasets of samples in different regions and detect bias in the separated datasets of sampling sites, forest plots and funnel plots were utilized in the meta-analysis. These plots were used to assess the heterogeneity and bias of data subsets after removing outliers. The Meta package in the R language was employed to identify heterogeneity and bias. First, the dataset was exported to a CSV file, with the concentration data assigned to the experimental group and the average assigned to the control group. Then, the Meta package was executed in R 4.3.0, and the experimental results were generated according to the instructions for forest and funnel plots.

Forest plots used in this study were used to verify the heterogeneity between sub-datasets of samples in different regions. In the forest plot, an invalid line perpendicular to the *X*-axis (usually *X* = 1 or 0) is used as the center in the plane rectangular coordinate system, and several line segments parallel to the *X*-axis are used to represent the effect size of each study and its 95% confidence interval, and a prism is used to represent the effect size and confidence interval of multiple studies. It is the most commonly used expression of results synthesis in meta-analysis.

When the 95% confidence interval (*CI*) of the effect size includes 1, it proves that there is no statistically significant difference in the incidence of outcome events between the two groups. However, when the 95% *CI* of the effect size is greater than 1, and the horizontal line segment in the forest plot does not intersect with the invalid line and is on the right side of the invalid line, it can be concluded that the concentration of factor group B is higher than that of factor group A. Conversely, when the 95% *CI* of the effect size is less than 1, and the horizontal line segment in the forest plot does not intersect with the invalid line and is on the left side of the invalid line, it can be concluded that the concentration of factor group B is lower than that of factor group A.

The *I*2 value in the forest plot represents the heterogeneity of the samples. When I2 is greater than 50%, there is strong heterogeneity, indicating a significant difference. When *p* is less than 0.01, it indicates that the test of heterogeneity is within a 99% confidence interval. For this study, when *p* < 0.01 of a certain metal dataset, it means that the sampling sites in this dataset have significant biases compared to its corresponding average.

In this study, we hope that the data subsets after removing Outlier can fairly take into account the regional spatial distribution while retaining the common distribution features of the world's rivers. Therefore, data subsets with significant spatial differences are more appropriate for this study, i.e., the data subsets showing heterogeneity in the forest plots are acceptable for this study.

Spatiotemporal differences are necessary conditions for modeling a dataset. In this study, we divided the different regions of each indicator in the dataset. In this study, samples will be labeled according to the month for machine learning purposes. However, it is important to consider the potential variations in sample effects associated with different labels. Therefore, both the environmental variables and the components under investigation were tested for heterogeneity in the dataset.

The following figure provides the results of a meta-analysis of multiple components and physical indicators. In the physical index, the flow data was not tested due to differences in sampling sites. Among the other six physical indicators, the factors that exhibited monthly heterogeneity were temperature, water temperature, and rainfall. This means that there is a partial physical mechanism difference through the grouping labeled by month.

# SA 4. ML methods are used for feature decomposition

The output results of the selected machine learning models, including decision trees, random forest, ExtraTrees, Adaboost, GBDT, Catboost, and Xgboost will be presented in this support material. A comparative analysis between these 7 methods should be conducted prior to the presentation.

**Loss function values**

In machine learning, supervised learning is essentially a mapping relationship that aims to learn from a series of training samples, with the goal of accurately predicting the output for an unseen input x. The loss function, which maps the value of a random event or its related random variables to a non-negative real number, plays a crucial role in this process. It represents the "risk" or "loss" associated with the random event and is commonly employed for parametric estimation of model parameters. The loss function quantifies the difference between the model's output and the actual output, serving as a foundation for optimizing the model.

The Mean Squared Error (MSE) Loss, also known as L2 Loss, is widely used in machine learning and deep learning regression tasks. L2 refers to the L2 Norm, which represents the Euclidean Norm. By calculating the Euclidean distance between the predicted value and the true value, MSE provides a measure of the difference between them. Consequently, L2 Loss is derived. Its basic form can be expressed as follows,

(1)

Mean Absolute Error (MAE) is another commonly used loss function, also known as L1 norm. The L1 norm refers to the sum of the absolute values of each element, so we can also observe the connection between L1 Loss and MAE. Its basic form can be expressed as follows:

(2)

The main distinction between MAE and MSE as loss functions is that MSE losses typically converge faster than MAE due to the distinction between Squaring and Linearity. However, MAE losses are more robust to outliers, meaning they are less affected by outlier noise. We have learned about the advantages and disadvantages of MSE and MAE losses: MSE losses converge quickly but are vulnerable to outlier noise, while MAE is more robust to outliers but converges slowly.

**Feature decomposition results**

Feature decomposition results for NO3– and NH4+ (Based on 7 machine learning methods and 4 climate warming models) are shown in **Table SB4** and **Table SB5**.

The quantification of actual weights utilizes a comprehensive range of machine learning methods outlined in section 2.4. To ensure the reliability of the results, a comparison is conducted among these methods. The specific settings of these methods can be found in **Appendix 2**.

# SA 5. Nitrogen predicted according to the training set

**Changes of natural characteristics affecting river nitrogen**

The changes of different variables from 2015 to 2050. **Tables SB-4** to **SB-15** show the changes of different variables in each month of 2015. The data for 2020 is shown in **tables SB-16** to **SB-27**. The data for 2050 is shown in **tables SB-28** to **SB-39**.

# Appendix 1

Export information of 37 variables.

[Note] The same variable is usually a series of files, including four climate change models. There are 1 to 8 files in each model. This appendix only shows the first file due to space limitations.

**Ⅰ air temperature**

netcdf4_classic

Global Attributes:

CCCma_model_hash= '1f91f92cb6d607391f44831504025d32fc44faa1'

CCCma_parent_runid= 'rc3.1-his01'

CCCma_pycmor_hash= '33c30511acc319a98240633965a04ca99c26427e'

CCCma_runid= 'rc3.1-s2601'

Conventions= 'CF-1.7 CMIP-6.2'

YMDH_branch_time_in_child= '2015:01:01:00'

YMDH_branch_time_in_parent = '2015:01:01:00'

activity_id= 'ScenarioMIP'

branch_method= 'Spin-up documentation'

branch_time_in_child = 60225

branch_time_in_parent= 60225

contact= 'ec.cccma.info-info.ccmac.ec@canada.ca'

creation_date= '2019-04-30T18:14:27Z'

data_specs_version = '01.00.29'

experiment = 'update of RCP2.6 based on SSP1'

experiment_id= 'ssp126'

external_variables = 'areacella'

forcing_index= 1

frequency= 'mon'

further_info_url='https://furtherinfo.es-doc.org/CMIP6.CCCma.CanESM5.ssp126.none.r1i1p1f1'

grid = 'T63L49 native atmosphere, T63 Linear Gaussian Grid; 128 x 64 longitude/latitude; 49 levels; top level 1 hPa'

grid_label = 'gn'

history= '2019-04-30T18:14:27Z ;rewrote data to be consistent with ScenarioMIP for variable tasmin found in table Amon.;

Output from $runid'

initialization_index = 1

institution= 'Canadian Centre for Climate Modelling and Analysis, Environment and Climate Change Canada, Victoria, BC V8P 5C2, Canada'

institution_id = 'CCCma'

mip_era= 'CMIP6'

nominal_resolution = '500 km'

parent_activity_id = 'CMIP'

parent_experiment_id = 'historical'

parent_mip_era = 'CMIP6'

parent_source_id = 'CanESM5'

parent_time_units= 'days since 1850-01-01 0:0:0.0'

parent_variant_label = 'r1i1p1f1'

physics_index= 1

product= 'model-output'

realization_index= 1

realm= 'atmos'

references = 'Geophysical Model Development Special issue on CanESM5 (https://www.geosci-model-dev.net/special_issues.html)'

source = 'CanESM5 (2019):

aerosol: interactive

atmos: CanAM5 (T63L49 native atmosphere, T63 Linear Gaussian Grid; 128 x 64 longitude/latitude; 49 levels; top level 1 hPa)

atmosChem: specified oxidants for aerosols

land: CLASS3.6/CTEM1.2

landIce: specified ice sheets

ocean: NEMO3.4.1 (ORCA1 tripolar grid, 1 deg with refinement to 1/3 deg within 20 degrees of the equator; 361 x 290 longitude/latitude; 45 vertical levels; top grid cell 0-6.19 m)

ocnBgchem: Canadian Model of Ocean Carbon (CMOC); NPZD ecosystem with OMIP prescribed carbonate chemistry

seaIce: LIM2'

source_id= 'CanESM5'

source_type= 'AOGCM'

sub_experiment = 'none'

sub_experiment_id= 'none'

table_id = 'Amon'

table_info = 'Creation Date:(20 February 2019) MD5:374fbe5a2bcca535c40f7f23da271e49'

title= 'CanESM5 output prepared for CMIP6'

tracking_id= 'hdl:21.14100/0d8d5482-0194-4030-bfd7-761823e8cda8'

variable_id= 'tasmin'

variant_label= 'r1i1p1f1'

version= 'v20190429'

license= 'CMIP6 model data produced by The Government of Canada (Canadian Centre for Climate Modelling and Analysis, Environment and Climate Change Canada) is licensed under a Creative Commons Attribution ShareAlike 4.0 International License (https://creativecommons.org/licenses). Consult https://pcmdi.llnl.gov/CMIP6/TermsOfUse for terms of use governing CMIP6 output, including citation requirements and proper acknowledgment. Further information about this data, including some limitations, can be found via the further_info_url (recorded as a global attribute in this file) and at https:///pcmdi.llnl.gov/. The data producers and data providers make no warranty, either express or implied, including, but not limited to, warranties of merchantability and fitness for a particular purpose. All liabilities arising from the supply of the information (including any liability arising in negligence) are excluded to the fullest extent permitted by law.'

cmor_version = '3.4.0'

Dimensions:

time = 1032(UNLIMITED)

bnds = 2

lat= 64

lon= 128

Variables:

time

Size: 1032x1

Dimensions: time

Datatype: double

Attributes:

bounds= 'time_bnds'

units = 'days since 1850-01-01 0:0:0.0'

calendar= '365_day'

axis= 'T'

long_name = 'time'

standard_name = 'time'

time_bnds

Size: 2x1032

Dimensions: bnds,time

Datatype: double

lat

Size: 64x1

Dimensions: lat

Datatype: double

Attributes:

bounds= 'lat_bnds'

units = 'degrees_north'

axis= 'Y'

long_name = 'Latitude'

standard_name = 'latitude'

lat_bnds

Size: 2x64

Dimensions: bnds,lat

Datatype: double

lon

Size: 128x1

Dimensions: lon

Datatype: double

Attributes:

bounds= 'lon_bnds'

units = 'degrees_east'

axis= 'X'

long_name = 'Longitude'

standard_name = 'longitude'

lon_bnds

Size: 2x128

Dimensions: bnds,lon

Datatype: double

height

Size: 1x1

Dimensions:

Datatype: double

Attributes:

units = 'm'

axis= 'Z'

positive= 'up'

long_name = 'height'

standard_name = 'height'

tasmin

Size: 128x64x1032

Dimensions: lon,lat,time

Datatype: single

Attributes:

standard_name = 'air_temperature'

long_name = 'Daily Minimum Near-Surface Air Temperature'

comment = 'STMN+273.16, ScenarioMIP_table_comment: minimum near-surface (usually, 2 meter) air temperature (add cell_method attribute 'time: min')'

units = 'K'

original_name = 'STMN'

history = 'degctok 2019-04-30T18:14:27Z altered by CMOR: Treated scalar dimension: 'height'. 2019-04-30T18:14:27Z altered by CMOR: Reordered dimensions, original order: lat lon time. 2019-04-30T18:14:27Z altered by CMOR: replaced missing value flag (1e+38) with standard missing value (1e+20).'

cell_methods= 'area: mean time: minimum within days time: mean over days'

cell_measures = 'area: areacella'

coordinates = 'height'

missing_value = 1.000000020040877e+20

_FillValue= 1.000000020040877e+20

**Ⅱ leaf area index**

netcdf4_classic

Global Attributes:

CCCma_model_hash = 'Unknown'

CCCma_parent_runid = 'rc3.1-his11'

CCCma_pycmor_hash= '26c970628162d607fffd14254956ebc6dd3b6f49'

CCCma_runid= 'rc3.1-s2611'

Conventions= 'CF-1.7 CMIP-6.2'

YMDH_branch_time_in_child= '2015:01:01:00'

YMDH_branch_time_in_parent = '2015:01:01:00'

activity_id= 'ScenarioMIP'

branch_method= 'Spin-up documentation'

branch_time_in_child = 60225

branch_time_in_parent= 60225

contact= 'ec.cccma.info-info.ccmac.ec@canada.ca'

creation_date= '2019-09-26T17:08:59Z'

data_specs_version = '01.00.30'

experiment = 'update of RCP2.6 based on SSP1'

experiment_id= 'ssp126'

external_variables = 'areacella'

forcing_index= 1

frequency= 'mon'

further_info_url = 'https://furtherinfo.es-doc.org/CMIP6.CCCma.CanESM5.ssp126.none.r11i1p1f1'

grid = 'T63L49 native atmosphere, T63 Linear Gaussian Grid; 128 x 64 longitude/latitude; 49 levels; top level 1 hPa'

grid_label = 'gn'

history= '2019-09-26T17:08:59Z ;rewrote data to be consistent with ScenarioMIP for variable lai found in table Lmon.'

initialization_index = 1

institution= 'Canadian Centre for Climate Modelling and Analysis, Environment and Climate Change Canada, Victoria, BC V8P 5C2, Canada'

institution_id = 'CCCma'

mip_era= 'CMIP6'

nominal_resolution = '500 km'

parent_activity_id = 'CMIP'

parent_experiment_id = 'historical'

parent_mip_era = 'CMIP6'

parent_source_id = 'CanESM5'

parent_time_units= 'days since 1850-01-01 0:0:0.0'

parent_variant_label = 'r11i1p1f1'

physics_index= 1

product= 'model-output'

realization_index= 11

realm= 'land'

references = 'Geophysical Model Development Special issue on CanESM5 (https://www.geosci-model-dev.net/special_issue989.html)'

source = 'CanESM5 (2019):

aerosol: interactive

atmos: CanAM5 (T63L49 native atmosphere, T63 Linear Gaussian Grid; 128 x 64 longitude/latitude; 49 levels; top level 1 hPa)

atmosChem: specified oxidants for aerosols

land: CLASS3.6/CTEM1.2

landIce: specified ice sheets

ocean: NEMO3.4.1 (ORCA1 tripolar grid, 1 deg with refinement to 1/3 deg within 20 degrees of the equator; 361 x 290 longitude/latitude; 45 vertical levels; top grid cell 0-6.19 m)

ocnBgchem: Canadian Model of Ocean Carbon (CMOC); NPZD ecosystem with OMIP prescribed carbonate chemistry

seaIce: LIM2'

source_id= 'CanESM5'

source_type= 'AOGCM'

sub_experiment = 'none'

sub_experiment_id= 'none'

table_id = 'Lmon'

table_info = 'Creation Date:(09 May 2019) MD5:38ea1fbdf3f31659e83c719fb4c48428'

title= 'CanESM5 output prepared for CMIP6'

tracking_id= 'hdl:21.14100/a1881e9c-5b39-45e8-835c-2d0265cff3e2'

variable_id= 'lai'

variant_label= 'r11i1p1f1'

version= 'v20190429'

license= 'CMIP6 model data produced by The Government of Canada (Canadian Centre for Climate Modelling and Analysis, Environment and Climate Change Canada) is licensed under a Creative Commons Attribution ShareAlike 4.0 International License (https://creativecommons.org/licenses). Consult https://pcmdi.llnl.gov/CMIP6/TermsOfUse for terms of use governing CMIP6 output, including citation requirements and proper acknowledgment. Further information about this data, including some limitations, can be found via the further_info_url (recorded as a global attribute in this file) and at https:///pcmdi.llnl.gov/. The data producers and data providers make no warranty, either express or implied, including, but not limited to, warranties of merchantability and fitness for a particular purpose. All liabilities arising from the supply of the information (including any liability arising in negligence) are excluded to the fullest extent permitted by law.'

cmor_version = '3.5.0'

Dimensions:

time = 1032(UNLIMITED)

bnds = 2

lat= 64

lon= 128

Variables:

time

Size: 1032x1

Dimensions: time

Datatype: double

Attributes:

bounds= 'time_bnds'

units = 'days since 1850-01-01 0:0:0.0'

calendar= '365_day'

axis= 'T'

long_name = 'time'

standard_name = 'time'

time_bnds

Size: 2x1032

Dimensions: bnds,time

Datatype: double

lat

Size: 64x1

Dimensions: lat

Datatype: double

Attributes:

bounds= 'lat_bnds'

units = 'degrees_north'

axis= 'Y'

long_name = 'Latitude'

standard_name = 'latitude'

lat_bnds

Size: 2x64

Dimensions: bnds,lat

Datatype: double

lon

Size: 128x1

Dimensions: lon

Datatype: double

Attributes:

bounds= 'lon_bnds'

units = 'degrees_east'

axis= 'X'

long_name = 'Longitude'

standard_name = 'longitude'

lon_bnds

Size: 2x128

Dimensions: bnds,lon

Datatype: double

lai

Size: 128x64x1032

Dimensions: lon,lat,time

Datatype: single

Attributes:

standard_name = 'leaf_area_index'

long_name = 'Leaf Area Index'

comment = 'A ratio obtained by dividing the total upper leaf surface area of vegetation by the (horizontal) surface area of the land on which it grows.'

units = '1'

original_name = 'CLAI'

cell_methods= 'area: mean where land time: mean'

cell_measures = 'area: areacella'

history = '2019-09-26T17:08:59Z altered by CMOR: Reordered dimensions, original order: lat lon time. 2019-09-26T17:08:59Z altered by CMOR: replaced missing value flag (1e+38) and corresponding data with standard missing value (1e+20).'

missing_value = 1.000000020040877e+20

_FillValue= 1.000000020040877e+20

**Ⅲ precipitation flux**

netcdf4_classic

Global Attributes:

CCCma_model_hash = 'fc4bb7db954c862d023b546e19aec6c588bc0552'

CCCma_parent_runid = 'p2-his11'

CCCma_pycmor_hash= '26c970628162d607fffd14254956ebc6dd3b6f49'

CCCma_runid= 'p2-s4511'

Conventions= 'CF-1.7 CMIP-6.2'

YMDH_branch_time_in_child= '2015:01:01:00'

YMDH_branch_time_in_parent = '2015:01:01:00'

activity_id= 'ScenarioMIP'

branch_method= 'Spin-up documentation'

branch_time_in_child = 60225

branch_time_in_parent= 60225

contact= 'ec.cccma.info-info.ccmac.ec@canada.ca'

creation_date= '2019-09-25T23:29:26Z'

data_specs_version = '01.00.30'

experiment = 'update of RCP4.5 based on SSP2'

experiment_id= 'ssp245'

external_variables = 'areacella'

forcing_index= 1

frequency= 'mon'

further_info_url = 'https://furtherinfo.es-doc.org/CMIP6.CCCma.CanESM5.ssp245.none.r11i1p2f1'

grid = 'T63L49 native atmosphere, T63 Linear Gaussian Grid; 128 x 64 longitude/latitude; 49 levels; top level 1 hPa'

grid_label = 'gn'

history= '2019-09-25T23:29:26Z ;rewrote data to be consistent with ScenarioMIP for variable pr found in table Amon.'

initialization_index = 1

institution= 'Canadian Centre for Climate Modelling and Analysis, Environment and Climate Change Canada, Victoria, BC V8P 5C2, Canada'

institution_id = 'CCCma'

mip_era= 'CMIP6'

nominal_resolution = '500 km'

parent_activity_id = 'CMIP'

parent_experiment_id = 'historical'

parent_mip_era = 'CMIP6'

parent_source_id = 'CanESM5'

parent_time_units= 'days since 1850-01-01 0:0:0.0'

parent_variant_label = 'r11i1p2f1'

physics_index= 2

product= 'model-output'

realization_index= 11

realm= 'atmos'

references = 'Geophysical Model Development Special issue on CanESM5 (https://www.geosci-model-dev.net/special_issue989.html)'

source = 'CanESM5 (2019):

aerosol: interactive

atmos: CanAM5 (T63L49 native atmosphere, T63 Linear Gaussian Grid; 128 x 64 longitude/latitude; 49 levels; top level 1 hPa)

atmosChem: specified oxidants for aerosols

land: CLASS3.6/CTEM1.2

landIce: specified ice sheets

ocean: NEMO3.4.1 (ORCA1 tripolar grid, 1 deg with refinement to 1/3 deg within 20 degrees of the equator; 361 x 290 longitude/latitude; 45 vertical levels; top grid cell 0-6.19 m)

ocnBgchem: Canadian Model of Ocean Carbon (CMOC); NPZD ecosystem with OMIP prescribed carbonate chemistry

seaIce: LIM2'

source_id= 'CanESM5'

source_type= 'AOGCM'

sub_experiment = 'none'

sub_experiment_id= 'none'

table_id = 'Amon'

table_info = 'Creation Date:(09 May 2019) MD5:38ea1fbdf3f31659e83c719fb4c48428'

title= 'CanESM5 output prepared for CMIP6'

tracking_id= 'hdl:21.14100/87c78728-8f4f-4ceb-be87-649691978926'

variable_id= 'pr'

variant_label= 'r11i1p2f1'

version= 'v20190429'

license= 'CMIP6 model data produced by The Government of Canada (Canadian Centre for Climate Modelling and Analysis, Environment and Climate Change Canada) is licensed under a Creative Commons Attribution ShareAlike 4.0 International License (https://creativecommons.org/licenses). Consult https://pcmdi.llnl.gov/CMIP6/TermsOfUse for terms of use governing CMIP6 output, including citation requirements and proper acknowledgment. Further information about this data, including some limitations, can be found via the further_info_url (recorded as a global attribute in this file) and at https:///pcmdi.llnl.gov/. The data producers and data providers make no warranty, either express or implied, including, but not limited to, warranties of merchantability and fitness for a particular purpose. All liabilities arising from the supply of the information (including any liability arising in negligence) are excluded to the fullest extent permitted by law.'

cmor_version = '3.5.0'

Dimensions:

time = 1032(UNLIMITED)

bnds = 2

lat= 64

lon= 128

Variables:

time

Size: 1032x1

Dimensions: time

Datatype: double

Attributes:

bounds= 'time_bnds'

units = 'days since 1850-01-01 0:0:0.0'

calendar= '365_day'

axis= 'T'

long_name = 'time'

standard_name = 'time'

time_bnds

Size: 2x1032

Dimensions: bnds,time

Datatype: double

lat

Size: 64x1

Dimensions: lat

Datatype: double

Attributes:

bounds= 'lat_bnds'

units = 'degrees_north'

axis= 'Y'

long_name = 'Latitude'

standard_name = 'latitude'

lat_bnds

Size: 2x64

Dimensions: bnds,lat

Datatype: double

lon

Size: 128x1

Dimensions: lon

Datatype: double

Attributes:

bounds= 'lon_bnds'

units = 'degrees_east'

axis= 'X'

long_name = 'Longitude'

standard_name = 'longitude'

lon_bnds

Size: 2x128

Dimensions: bnds,lon

Datatype: double

pr

Size: 128x64x1032

Dimensions: lon,lat,time

Datatype: single

Attributes:

standard_name = 'precipitation_flux'

long_name = 'Precipitation'

comment = 'includes both liquid and solid phases'

units = 'kg m-2 s-1'

original_name = 'PCP'

cell_methods= 'area: time: mean'

cell_measures = 'area: areacella'

history = '2019-09-25T23:29:26Z altered by CMOR: Reordered dimensions, original order: lat lon time. 2019-09-25T23:29:26Z altered by CMOR: replaced missing value flag (1e+38) and corresponding data with standard missing value (1e+20).'

missing_value = 1.000000020040877e+20

_FillValue= 1.000000020040877e+20

**Ⅳ-1 runoff flux**

netcdf4_classic

Global Attributes:

CCCma_model_hash = 'f40814ae97970257f253e53802f6dcb79ec2bb26'

CCCma_parent_runid = 'p2-his11'

CCCma_pycmor_hash= '26c970628162d607fffd14254956ebc6dd3b6f49'

CCCma_runid= 'p2-s2611'

Conventions= 'CF-1.7 CMIP-6.2'

YMDH_branch_time_in_child= '2015:01:01:00'

YMDH_branch_time_in_parent = '2015:01:01:00'

activity_id= 'ScenarioMIP'

branch_method= 'Spin-up documentation'

branch_time_in_child = 60225

branch_time_in_parent= 60225

contact= 'ec.cccma.info-info.ccmac.ec@canada.ca'

creation_date= '2019-09-25T22:09:38Z'

data_specs_version = '01.00.30'

experiment = 'update of RCP2.6 based on SSP1'

experiment_id= 'ssp126'

external_variables = 'areacella'

forcing_index= 1

frequency= 'mon'

further_info_url = 'https://furtherinfo.es-doc.org/CMIP6.CCCma.CanESM5.ssp126.none.r11i1p2f1'

grid = 'T63L49 native atmosphere, T63 Linear Gaussian Grid; 128 x 64 longitude/latitude; 49 levels; top level 1 hPa'

grid_label = 'gn'

history= '2019-09-25T22:09:38Z ;rewrote data to be consistent with ScenarioMIP for variable mrro found in table Lmon.'

initialization_index = 1

institution= 'Canadian Centre for Climate Modelling and Analysis, Environment and Climate Change Canada, Victoria, BC V8P 5C2, Canada'

institution_id = 'CCCma'

mip_era= 'CMIP6'

nominal_resolution = '500 km'

parent_activity_id = 'CMIP'

parent_experiment_id = 'historical'

parent_mip_era = 'CMIP6'

parent_source_id = 'CanESM5'

parent_time_units= 'days since 1850-01-01 0:0:0.0'

parent_variant_label = 'r11i1p2f1'

physics_index= 2

product= 'model-output'

realization_index= 11

realm= 'land'

references = 'Geophysical Model Development Special issue on CanESM5 (https://www.geosci-model-dev.net/special_issue989.html)'

source = 'CanESM5 (2019):

aerosol: interactive

atmos: CanAM5 (T63L49 native atmosphere, T63 Linear Gaussian Grid; 128 x 64 longitude/latitude; 49 levels; top level 1 hPa)

atmosChem: specified oxidants for aerosols

land: CLASS3.6/CTEM1.2

landIce: specified ice sheets

ocean: NEMO3.4.1 (ORCA1 tripolar grid, 1 deg with refinement to 1/3 deg within 20 degrees of the equator; 361 x 290 longitude/latitude; 45 vertical levels; top grid cell 0-6.19 m)

ocnBgchem: Canadian Model of Ocean Carbon (CMOC); NPZD ecosystem with OMIP prescribed carbonate chemistry

seaIce: LIM2'

source_id= 'CanESM5'

source_type= 'AOGCM'

sub_experiment = 'none'

sub_experiment_id= 'none'

table_id = 'Lmon'

table_info = 'Creation Date:(09 May 2019) MD5:38ea1fbdf3f31659e83c719fb4c48428'

title= 'CanESM5 output prepared for CMIP6'

tracking_id= 'hdl:21.14100/16da970a-efe1-4f3b-9512-a57d9e3f9b7e'

variable_id= 'mrro'

variant_label= 'r11i1p2f1'

version= 'v20190429'

license= 'CMIP6 model data produced by The Government of Canada (Canadian Centre for Climate Modelling and Analysis, Environment and Climate Change Canada) is licensed under a Creative Commons Attribution ShareAlike 4.0 International License (https://creativecommons.org/licenses). Consult https://pcmdi.llnl.gov/CMIP6/TermsOfUse for terms of use governing CMIP6 output, including citation requirements and proper acknowledgment. Further information about this data, including some limitations, can be found via the further_info_url (recorded as a global attribute in this file) and at https:///pcmdi.llnl.gov/. The data producers and data providers make no warranty, either express or implied, including, but not limited to, warranties of merchantability and fitness for a particular purpose. All liabilities arising from the supply of the information (including any liability arising in negligence) are excluded to the fullest extent permitted by law.'

cmor_version = '3.5.0'

Dimensions:

time = 1032(UNLIMITED)

bnds = 2

lat= 64

lon= 128

Variables:

time

Size: 1032x1

Dimensions: time

Datatype: double

Attributes:

bounds= 'time_bnds'

units = 'days since 1850-01-01 0:0:0.0'

calendar= '365_day'

axis= 'T'

long_name = 'time'

standard_name = 'time'

time_bnds

Size: 2x1032

Dimensions: bnds,time

Datatype: double

lat

Size: 64x1

Dimensions: lat

Datatype: double

Attributes:

bounds= 'lat_bnds'

units = 'degrees_north'

axis= 'Y'

long_name = 'Latitude'

standard_name = 'latitude'

lat_bnds

Size: 2x64

Dimensions: bnds,lat

Datatype: double

lon

Size: 128x1

Dimensions: lon

Datatype: double

Attributes:

bounds= 'lon_bnds'

units = 'degrees_east'

axis= 'X'

long_name = 'Longitude'

standard_name = 'longitude'

lon_bnds

Size: 2x128

Dimensions: bnds,lon

Datatype: double

mrro

Size: 128x64x1032

Dimensions: lon,lat,time

Datatype: single

Attributes:

standard_name = 'runoff_flux'

long_name = 'Total Runoff'

comment = 'The total run-off (including drainage through the base of the soil model) per unit area leaving the land portion of the grid cell.'

units = 'kg m-2 s-1'

original_name = 'ROF'

cell_methods= 'area: mean where land time: mean'

cell_measures = 'area: areacella'

history = '2019-09-25T22:09:38Z altered by CMOR: Reordered dimensions, original order: lat lon time. 2019-09-25T22:09:38Z altered by CMOR: replaced missing value flag (1e+38) and corresponding data with standard missing value (1e+20).'

missing_value = 1.000000020040877e+20

_FillValue= 1.000000020040877e+20

**Ⅳ-2 soil moisture content**

Format: classic

Global Attributes:

Conventions = 'CF-1.7 CMIP-6.2'

activity_id = 'ScenarioMIP'

branch_method = 'standard'

branch_time_in_child= 0

branch_time_in_parent = 0

contact = 'Kenneth Lo (cdkkl@giss.nasa.gov)'

creation_date = '2020-08-09T20:39:27Z'

data_specs_version= '01.00.23'

experiment= 'update of RCP4.5 based on SSP2'

experiment_id = 'ssp245'

external_variables= 'areacella'

forcing_index = 1

frequency = 'mon'

further_info_url= 'https://furtherinfo.es-doc.org/CMIP6.NASA-GISS.GISS-E2-1-G.ssp245.none.r1i1p5f1'

grid= 'atmospheric grid: 144x90, ocean grid: 288x180'

grid_label= 'gn'

history = '2020-08-09T20:39:27Z ; CMOR rewrote data to be consistent with CMIP6, CF-1.7 CMIP-6.2 and CF standards.'

initialization_index= 1

institution = 'Goddard Institute for Space Studies, New York, NY 10025, USA'

institution_id= 'NASA-GISS'

mip_era = 'CMIP6'

model_id= 'E214TmatrixSSP245aF40oQ40'

nominal_resolution= '250 km'

parent_activity_id= 'CMIP'

parent_experiment_id= 'historical'

parent_experiment_rip = 'r1i1p5f1'

parent_mip_era= 'CMIP6'

parent_source_id= 'GISS-E2-1-G'

parent_time_units = 'days since 2015-1-1'

parent_variant_label= 'r1i1p5f1'

physics_index = 5

product = 'model-output'

realization_index = 1

realm = 'land'

references= 'https://data.giss.nasa.gov/modelE/cmip6'

source= 'GISS-E2.1G (2019):

aerosol: Varies with physics-version (p==1 none, p==3 OMA, p==4 TOMAS, p==5 MATRIX)

atmos: GISS-E2.1 (2.5x2 degree; 144 x 90 longitude/latitude; 40 levels; top level 0.1 hPa)

atmosChem: Varies with physics-version (p==1 Non-interactive, p>1 GPUCCINI)

land: GISS LSM

landIce: none

ocean: GISS Ocean (GO1, 1 degree; 360 x 180 longitude/latitude; 40 levels; top grid cell 0-10 m)

ocnBgchem: none

seaIce: GISS SI'

source_id = 'GISS-E2-1-G'

source_type = 'AOGCM'

sub_experiment= 'none'

sub_experiment_id = 'none'

table_id= 'Lmon'

table_info= 'Creation Date:(21 March 2018) MD5:d211846f9d8f448e2718291a152c71ca'

title = 'GISS-E2-1-G output prepared for CMIP6'

tracking_id = 'hdl:21.14100/4b2d667b-a0d6-4fc3-8c68-876af307e8b9'

variable_id = 'mrso'

variant_label = 'r1i1p5f1'

license = 'CMIP6 model data produced by NASA Goddard Institute for Space Studies is licensed under a Creative Commons Attribution ShareAlike 4.0 International License (https://creativecommons.org/licenses). Consult https://pcmdi.llnl.gov/CMIP6/TermsOfUse for terms of use governing CMIP6 output, including citation requirements and proper acknowledgment. Further information about this data, including some limitations, can be found via the further_info_url (recorded as a global attribute in this file) and at https:///pcmdi.llnl.gov/. The data producers and data providers make no warranty, either express or implied, including, but not limited to, warranties of merchantability and fitness for a particular purpose. All liabilities arising from the supply of the information (including any liability arising in negligence) are excluded to the fullest extent permitted by law.'

cmor_version= '3.3.2'

Dimensions:

time = 432 (UNLIMITED)

lat= 90

lon= 144

bnds = 2

Variables:

time

Size: 432x1

Dimensions: time

Datatype: double

Attributes:

bounds= 'time_bnds'

units = 'days since 2015-1-1'

calendar= '365_day'

axis= 'T'

long_name = 'time'

standard_name = 'time'

time_bnds

Size: 2x432

Dimensions: bnds,time

Datatype: double

lat

Size: 90x1

Dimensions: lat

Datatype: double

Attributes:

bounds= 'lat_bnds'

units = 'degrees_north'

axis= 'Y'

long_name = 'latitude'

standard_name = 'latitude'

lat_bnds

Size: 2x90

Dimensions: bnds,lat

Datatype: double

lon

Size: 144x1

Dimensions: lon

Datatype: double

Attributes:

bounds= 'lon_bnds'

units = 'degrees_east'

axis= 'X'

long_name = 'longitude'

standard_name = 'longitude'

lon_bnds

Size: 2x144

Dimensions: bnds,lon

Datatype: double

mrso

Size: 144x90x432

Dimensions: lon,lat,time

Datatype: single

Attributes:

standard_name = 'soil_moisture_content'

long_name = 'Total Soil Moisture Content'

comment = 'the mass per unit area(summed over all soil layers) of water in all phases.'

units = 'kg m-2'

cell_methods= 'area: mean where land time: mean'

cell_measures = 'area: areacella'

history = '2020-08-09T20:39:27Z altered by CMOR: replaced missing value flag (-1e+30) with standard missing value (1e+20).'

missing_value = 1.000000020040877e+20

_FillValue= 1.000000020040877e+20

**Ⅳ-3 subsurface runoff flux**

Format: netcdf4_classic

Global Attributes:

Conventions = 'CF-1.7 CMIP-6.2'

activity_id = 'ScenarioMIP'

branch_method = 'standard'

branch_time_in_child= 60265

branch_time_in_parent = 60265

contact = 'cmip6-mpi-esm@dkrz.de'

creation_date = '2019-11-11T16:53:21Z'

data_specs_version= '01.00.30'

experiment= 'update of RCP2.6 based on SSP1'

experiment_id = 'ssp126'

external_variables= 'areacella'

forcing_index = 1

frequency = 'day'

further_info_url= 'https://furtherinfo.es-doc.org/CMIP6.MPI-M.MPI-ESM1-2-LR.ssp126.none.r2i1p1f1'

grid= 'gn'

grid_label= 'gn'

history = '2019-11-11T16:53:21Z ; CMOR rewrote data to be consistent with CMIP6, CF-1.7 CMIP-6.2 and CF standards.'

initialization_index= 1

institution = 'Max Planck Institute for Meteorology, Hamburg 20146, Germany'

institution_id= 'MPI-M'

mip_era = 'CMIP6'

nominal_resolution= '250 km'

parent_activity_id= 'CMIP'

parent_experiment_id= 'historical'

parent_mip_era= 'CMIP6'

parent_source_id= 'MPI-ESM1-2-LR'

parent_time_units = 'days since 1850-1-1 00:00:00'

parent_variant_label= 'r2i1p1f1'

physics_index = 1

product = 'model-output'

project_id= 'CMIP6'

realization_index = 2

realm = 'land'

references= 'MPI-ESM: Mauritsen, T. et al. (2019), Developments in the MPI‐M Earth System Model version 1.2 (MPI‐ESM1.2) and Its Response to Increasing CO2, J. Adv. Model. Earth Syst.,11, 998-1038, doi:10.1029/2018MS001400,

Mueller, W.A. et al. (2018): A high‐resolution version of the Max Planck Institute Earth System Model MPI‐ESM1.2‐HR. J. Adv. Model. EarthSyst.,10,1383–1413, doi:10.1029/2017MS001217'

source= 'MPI-ESM1.2-LR (2017):

aerosol: none, prescribed MACv2-SP

atmos: ECHAM6.3 (spectral T63; 192 x 96 longitude/latitude; 47 levels; top level 0.01 hPa)

atmosChem: none

land: JSBACH3.20

landIce: none/prescribed

ocean: MPIOM1.63 (bipolar GR1.5, approximately 1.5deg; 256 x 220 longitude/latitude; 40 levels; top grid cell 0-12 m)

ocnBgchem: HAMOCC6

seaIce: unnamed (thermodynamic (Semtner zero-layer) dynamic (Hibler 79) sea ice model)'

source_id = 'MPI-ESM1-2-LR'

source_type = 'AOGCM'

sub_experiment= 'none'

sub_experiment_id = 'none'

table_id= 'Eday'

table_info= 'Creation Date:(09 May 2019) MD5:e6ef8ececc8f338646ebfb3aeed36bfc'

title = 'MPI-ESM1-2-LR output prepared for CMIP6'

variable_id = 'mrrob'

variant_label = 'r2i1p1f1'

license = 'CMIP6 model data produced by MPI-M is licensed under a Creative Commons Attribution ShareAlike 4.0 International License (https://creativecommons.org/licenses). Consult https://pcmdi.llnl.gov/CMIP6/TermsOfUse for terms of use governing CMIP6 output, including citation requirements and proper acknowledgment. Further information about this data, including some limitations, can be found via the further_info_url (recorded as a global attribute in this file) and. The data producers and data providers make no warranty, either express or implied, including, but not limited to, warranties of merchantability and fitness for a particular purpose. All liabilities arising from the supply of the information (including any liability arising in negligence) are excluded to the fullest extent permitted by law.'

cmor_version= '3.5.0'

tracking_id = 'hdl:21.14100/03795b82-9715-4107-9f8f-9ee17d92c179'

Dimensions:

time = 7305(UNLIMITED)

lat= 96

lon= 192

bnds = 2

Variables:

time

Size: 7305x1

Dimensions: time

Datatype: double

Attributes:

bounds= 'time_bnds'

units = 'days since 1850-1-1 00:00:00'

calendar= 'proleptic_gregorian'

axis= 'T'

long_name = 'time'

standard_name = 'time'

time_bnds

Size: 2x7305

Dimensions: bnds,time

Datatype: double

lat

Size: 96x1

Dimensions: lat

Datatype: double

Attributes:

bounds= 'lat_bnds'

units = 'degrees_north'

axis= 'Y'

long_name = 'Latitude'

standard_name = 'latitude'

lat_bnds

Size: 2x96

Dimensions: bnds,lat

Datatype: double

lon

Size: 192x1

Dimensions: lon

Datatype: double

Attributes:

bounds= 'lon_bnds'

units = 'degrees_east'

axis= 'X'

long_name = 'Longitude'

standard_name = 'longitude'

lon_bnds

Size: 2x192

Dimensions: bnds,lon

Datatype: double

mrrob

Size: 192x96x7305

Dimensions: lon,lat,time

Datatype: single

Attributes:

standard_name = 'subsurface_runoff_flux'

long_name = 'Subsurface Runoff'

comment = 'Runoff is the liquid water which drains from land. If not specified, 'runoff' refers to the sum of surface runoff and subsurface drainage. In accordance with common usage in geophysical disciplines, 'flux' implies per unit area, called 'flux density' in physics.'

units = 'kg m-2 s-1'

cell_methods= 'area: mean where land time: mean'

cell_measures = 'area: areacella'

history = '2019-11-11T16:53:21Z altered by CMOR: replaced missing value flag (-9e+33) and corresponding data with standard missing value (1e+20). 2019-11-11T16:53:21Z altered by CMOR: Inverted axis: lat.'

missing_value = 1.000000020040877e+20

_FillValue= 1.000000020040877e+20

**Ⅳ-4 surface runoff flux**

Format: netcdf4_classic

Global Attributes:

CCCma_model_hash = 'Unknown'

CCCma_parent_runid = 'rc3.1-his11'

CCCma_pycmor_hash= '26c970628162d607fffd14254956ebc6dd3b6f49'

CCCma_runid= 'rc3.1-s2611'

Conventions= 'CF-1.7 CMIP-6.2'

YMDH_branch_time_in_child= '2015:01:01:00'

YMDH_branch_time_in_parent = '2015:01:01:00'

activity_id= 'ScenarioMIP'

branch_method= 'Spin-up documentation'

branch_time_in_child = 60225

branch_time_in_parent= 60225

contact= 'ec.cccma.info-info.ccmac.ec@canada.ca'

creation_date= '2019-09-26T17:09:01Z'

data_specs_version = '01.00.30'

experiment = 'update of RCP2.6 based on SSP1'

experiment_id= 'ssp126'

external_variables = 'areacella'

forcing_index= 1

frequency= 'mon'

further_info_url = 'https://furtherinfo.es-doc.org/CMIP6.CCCma.CanESM5.ssp126.none.r11i1p1f1'

grid = 'T63L49 native atmosphere, T63 Linear Gaussian Grid; 128 x 64 longitude/latitude; 49 levels; top level 1 hPa'

grid_label = 'gn'

history= '2019-09-26T17:09:01Z ;rewrote data to be consistent with ScenarioMIP for variable mrros found in table Lmon.'

initialization_index = 1

institution= 'Canadian Centre for Climate Modelling and Analysis, Environment and Climate Change Canada, Victoria, BC V8P 5C2, Canada'

institution_id = 'CCCma'

mip_era= 'CMIP6'

nominal_resolution = '500 km'

parent_activity_id = 'CMIP'

parent_experiment_id = 'historical'

parent_mip_era = 'CMIP6'

parent_source_id = 'CanESM5'

parent_time_units= 'days since 1850-01-01 0:0:0.0'

parent_variant_label = 'r11i1p1f1'

physics_index= 1

product= 'model-output'

realization_index= 11

realm= 'land'

references = 'Geophysical Model Development Special issue on CanESM5 (https://www.geosci-model-dev.net/special_issue989.html)'

source = 'CanESM5 (2019):

aerosol: interactive

atmos: CanAM5 (T63L49 native atmosphere, T63 Linear Gaussian Grid; 128 x 64 longitude/latitude; 49 levels; top level 1 hPa)

atmosChem: specified oxidants for aerosols

land: CLASS3.6/CTEM1.2

landIce: specified ice sheets

ocean: NEMO3.4.1 (ORCA1 tripolar grid, 1 deg with refinement to 1/3 deg within 20 degrees of the equator; 361 x 290 longitude/latitude; 45 vertical levels; top grid cell 0-6.19 m)

ocnBgchem: Canadian Model of Ocean Carbon (CMOC); NPZD ecosystem with OMIP prescribed carbonate chemistry

seaIce: LIM2'

source_id= 'CanESM5'

source_type= 'AOGCM'

sub_experiment = 'none'

sub_experiment_id= 'none'

table_id = 'Lmon'

table_info = 'Creation Date:(09 May 2019) MD5:38ea1fbdf3f31659e83c719fb4c48428'

title= 'CanESM5 output prepared for CMIP6'

tracking_id= 'hdl:21.14100/613fb46a-bbf7-42d7-ad51-e45a79bf1404'

variable_id= 'mrros'

variant_label= 'r11i1p1f1'

version= 'v20190429'

license= 'CMIP6 model data produced by The Government of Canada (Canadian Centre for Climate Modelling and Analysis, Environment and Climate Change Canada) is licensed under a Creative Commons Attribution ShareAlike 4.0 International License (https://creativecommons.org/licenses). Consult https://pcmdi.llnl.gov/CMIP6/TermsOfUse for terms of use governing CMIP6 output, including citation requirements and proper acknowledgment. Further information about this data, including some limitations, can be found via the further_info_url (recorded as a global attribute in this file) and at https:///pcmdi.llnl.gov/. The data producers and data providers make no warranty, either express or implied, including, but not limited to, warranties of merchantability and fitness for a particular purpose. All liabilities arising from the supply of the information (including any liability arising in negligence) are excluded to the fullest extent permitted by law.'

cmor_version = '3.5.0'

Dimensions:

time = 1032(UNLIMITED)

bnds = 2

lat= 64

lon= 128

Variables:

time

Size: 1032x1

Dimensions: time

Datatype: double

Attributes:

bounds= 'time_bnds'

units = 'days since 1850-01-01 0:0:0.0'

calendar= '365_day'

axis= 'T'

long_name = 'time'

standard_name = 'time'

time_bnds

Size: 2x1032

Dimensions: bnds,time

Datatype: double

lat

Size: 64x1

Dimensions: lat

Datatype: double

Attributes:

bounds= 'lat_bnds'

units = 'degrees_north'

axis= 'Y'

long_name = 'Latitude'

standard_name = 'latitude'

lat_bnds

Size: 2x64

Dimensions: bnds,lat

Datatype: double

lon

Size: 128x1

Dimensions: lon

Datatype: double

Attributes:

bounds= 'lon_bnds'

units = 'degrees_east'

axis= 'X'

long_name = 'Longitude'

standard_name = 'longitude'

lon_bnds

Size: 2x128

Dimensions: bnds,lon

Datatype: double

mrros

Size: 128x64x1032

Dimensions: lon,lat,time

Datatype: single

Attributes:

standard_name = 'surface_runoff_flux'

long_name = 'Surface Runoff'

comment = 'The total surface run off leaving the land portion of the grid cell (excluding drainage through the base of the soil model).'

units = 'kg m-2 s-1'

original_name = 'ROFO'

cell_methods= 'area: mean where land time: mean'

cell_measures = 'area: areacella'

history = '2019-09-26T17:09:01Z altered by CMOR: Reordered dimensions, original order: lat lon time. 2019-09-26T17:09:01Z altered by CMOR: replaced missing value flag (1e+38) and corresponding data with standard missing value (1e+20).'

missing_value = 1.000000020040877e+20

_FillValue= 1.000000020040877e+20

**A-1 release from grass tile as mass flux**

Format: netcdf4

Global Attributes:

Conventions = 'CF-1.7 CMIP-6.2'

activity_id = 'ScenarioMIP'

branch_method = 'standard'

branch_time_in_child= 735110

branch_time_in_parent = 735110

case_id = '1728'

cesm_casename = 'b.e21.BSSP126cmip6.f09_g17.CMIP6-SSP1-2.6.102'

contact = 'cesm_cmip6@ucar.edu'

creation_date = '2020-05-27T16:12:33Z'

data_specs_version= '01.00.31'

experiment= 'SSP-based RCP scenario with low radiative forcing by the end of the century.Following approximately RCP2.6 global forcing pathway with SSP1 socioeconomic conditions. Radiative forcing reaches a level of 2.6 W/m2 in 2100. Concentration-driven.'

experiment_id = 'ssp126'

external_variables= 'areacella'

forcing_index = 1

frequency = 'mon'

further_info_url= 'https://furtherinfo.es-doc.org/CMIP6.NCAR.CESM2.ssp126.none.r11i1p1f1'

grid= 'native 0.9x1.25 finite volume grid (192x288 latxlon)'

grid_label= 'gn'

initialization_index= 1

institution = 'National Center for Atmospheric Research, Climate and Global Dynamics Laboratory, 1850 Table Mesa Drive, Boulder, CO 80305, USA'

institution_id= 'NCAR'

license = 'CMIP6 model data produced by <The National Center for Atmospheric Research> is licensed under a Creative Commons Attribution-[]ShareAlike 4.0 International License (https://creativecommons.org/licenses/). Consult https://pcmdi.llnl.gov/CMIP6/TermsOfUse for terms of use governing CMIP6 output, including citation requirements and proper acknowledgment. Further information about this data, including some limitations, can be found via the further_info_url (recorded as a global attribute in this file)[]. The data producers and data providers make no warranty, either express or implied, including, but not limited to, warranties of merchantability and fitness for a particular purpose. All liabilities arising from the supply of the information (including any liability arising in negligence) are excluded to the fullest extent permitted by law.'

mip_era = 'CMIP6'

model_doi_url = 'https://doi.org/10.5065/D67H1H0V'

nominal_resolution= '100 km'

parent_activity_id= 'CMIP'

parent_experiment_id= 'historical'

parent_mip_era= 'CMIP6'

parent_source_id= 'CESM2'

parent_time_units = 'days since 0001-01-01 00:00:00'

parent_variant_label= 'r11i1p1f1'

physics_index = 1

product = 'model-output'

realization_index = 11

realm = 'land'

source= 'CESM2 (2017): atmosphere: CAM6 (0.9x1.25 finite volume grid; 288 x 192 longitude/latitude; 32 levels; top level 2.25 mb); ocean: POP2 (320x384 longitude/latitude; 60 levels; top grid cell 0-10 m); sea_ice: CICE5.1 (same grid as ocean); land: CLM5 0.9x1.25 finite volume grid; 288 x 192 longitude/latitude; 32 levels; top level 2.25 mb); aerosol: MAM4 (0.9x1.25 finite volume grid; 288 x 192 longitude/latitude; 32 levels; top level 2.25 mb); atmoschem: MAM4 (0.9x1.25 finite volume grid; 288 x 192 longitude/latitude; 32 levels; top level 2.25 mb); landIce: CISM2.1; ocnBgchem: MARBL (320x384 longitude/latitude; 60 levels; top grid cell 0-10 m)'

source_id = 'CESM2'

source_type = 'AOGCM BGC AER'

sub_experiment= 'none'

sub_experiment_id = 'none'

table_id= 'Emon'

tracking_id = 'hdl:21.14100/b11b7182-1dbe-463a-8e92-0c78592c43e8'

variable_id = 'raGrass'

variant_info= 'CMIP6 SSP1-2.6 experiments (2015-2100) with CAM6, interactive land (CLM5), coupled ocean (POP2) with biogeochemistry (MARBL), interactive sea ice (CICE5.1), and non-evolving land ice (CISM2.1).'

variant_label = 'r11i1p1f1'

Dimensions:

lat = 192

hist_interval = 2

lon = 288

time= 600 (UNLIMITED)

Variables:

raGrass

Size: 288x192x600

Dimensions: lon,lat,time

Datatype: single

Attributes:

_FillValue= 1.000000020040877e+20

cell_measures = 'area: areacella'

cell_methods= 'area: time: mean where natural_grasses (comment: mask=grassFrac)'

comment = 'chunits(CLM_pft_to_CMIP6_vegtype(AR,"grass",time, lat, lon, grid1d_ixy, grid1d_jxy, grid1d_lon,grid1d_lat, land1d_lon, land1d_lat, land1d_ityplunit,pfts1d_lon, pfts1d_lat, pfts1d_active, pfts1d_itype_veg,pfts1d_wtgcell, pfts1d_wtlunit), units="g m-2 s-1")'

coordinates = 'time lat lon'

description = 'Total RA of grass in the grid cell'

frequency = 'mon'

id= 'raGrass'

long_name = 'Autotrophic Respiration on Grass Tiles as Carbon Mass Flux [kgC m-2 s-1]'

mipTable= 'Emon'

missing_value = 1e+20

out_name= 'raGrass'

prov= 'C4MIP [C_LandT2]'

realm = 'land'

standard_name = 'surface_upward_mass_flux_of_carbon_dioxide_expressed_as_carbon_due_to_plant_respiration'

time= 'time'

time_label= 'time-mean'

time_title= 'Temporal mean'

title = 'Autotrophic Respiration on Grass Tiles as Carbon Mass Flux [kgC m-2 s-1]'

type= 'real'

units = 'kg m-2 s-1'

variable_id = 'raGrass'

lat

Size: 192x1

Dimensions: lat

Datatype: double

Attributes:

axis= 'Y'

bounds= 'lat_bnds'

standard_name = 'latitude'

title = 'Latitude'

type= 'double'

units = 'degrees_north'

valid_max = 90

valid_min = -90

lon

Size: 288x1

Dimensions: lon

Datatype: double

Attributes:

axis= 'X'

bounds= 'lon_bnds'

standard_name = 'longitude'

title = 'Longitude'

type= 'double'

units = 'degrees_east'

valid_max = 360

valid_min = 0

time

Size: 600x1

Dimensions: time

Datatype: double

Attributes:

axis= 'T'

bounds= 'time_bnds'

standard_name = 'time'

title = 'time'

type= 'double'

units = 'days since 0001-01-01 00:00:00'

calendar= '365_day'

time_bnds

Size: 2x600

Dimensions: hist_interval,time

Datatype: double

Attributes:

calendar = 'noleap'

units= 'days since 0001-01-01 00:00:00'

lat_bnds

Size: 2x192

Dimensions: hist_interval,lat

Datatype: single

Attributes:

units = 'degrees_north'

lon_bnds

Size: 2x288

Dimensions: hist_interval,lon

Datatype: single

Attributes:

units = 'degrees_east'

**A-2 release from shrub tiles as mass flux**

Format: netcdf4

Global Attributes:

Conventions = 'CF-1.7 CMIP-6.2'

activity_id = 'ScenarioMIP'

branch_method = 'standard'

branch_time_in_child= 735110

branch_time_in_parent = 735110

case_id = '1728'

cesm_casename = 'b.e21.BSSP126cmip6.f09_g17.CMIP6-SSP1-2.6.102'

contact = 'cesm_cmip6@ucar.edu'

creation_date = '2020-05-27T16:13:16Z'

data_specs_version= '01.00.31'

experiment= 'SSP-based RCP scenario with low radiative forcing by the end of the century.Following approximately RCP2.6 global forcing pathway with SSP1 socioeconomic conditions. Radiative forcing reaches a level of 2.6 W/m2 in 2100. Concentration-driven.'

experiment_id = 'ssp126'

external_variables= 'areacella'

forcing_index = 1

frequency = 'mon'

further_info_url= 'https://furtherinfo.es-doc.org/CMIP6.NCAR.CESM2.ssp126.none.r11i1p1f1'

grid= 'native 0.9x1.25 finite volume grid (192x288 latxlon)'

grid_label= 'gn'

initialization_index= 1

institution = 'National Center for Atmospheric Research, Climate and Global Dynamics Laboratory, 1850 Table Mesa Drive, Boulder, CO 80305, USA'

institution_id= 'NCAR'

license = 'CMIP6 model data produced by <The National Center for Atmospheric Research> is licensed under a Creative Commons Attribution-[]ShareAlike 4.0 International License (https://creativecommons.org/licenses/). Consult https://pcmdi.llnl.gov/CMIP6/TermsOfUse for terms of use governing CMIP6 output, including citation requirements and proper acknowledgment. Further information about this data, including some limitations, can be found via the further_info_url (recorded as a global attribute in this file)[]. The data producers and data providers make no warranty, either express or implied, including, but not limited to, warranties of merchantability and fitness for a particular purpose. All liabilities arising from the supply of the information (including any liability arising in negligence) are excluded to the fullest extent permitted by law.'

mip_era = 'CMIP6'

model_doi_url = 'https://doi.org/10.5065/D67H1H0V'

nominal_resolution= '100 km'

parent_activity_id= 'CMIP'

parent_experiment_id= 'historical'

parent_mip_era= 'CMIP6'

parent_source_id= 'CESM2'

parent_time_units = 'days since 0001-01-01 00:00:00'

parent_variant_label= 'r11i1p1f1'

physics_index = 1

product = 'model-output'

realization_index = 11

realm = 'land'

source= 'CESM2 (2017): atmosphere: CAM6 (0.9x1.25 finite volume grid; 288 x 192 longitude/latitude; 32 levels; top level 2.25 mb); ocean: POP2 (320x384 longitude/latitude; 60 levels; top grid cell 0-10 m); sea_ice: CICE5.1 (same grid as ocean); land: CLM5 0.9x1.25 finite volume grid; 288 x 192 longitude/latitude; 32 levels; top level 2.25 mb); aerosol: MAM4 (0.9x1.25 finite volume grid; 288 x 192 longitude/latitude; 32 levels; top level 2.25 mb); atmoschem: MAM4 (0.9x1.25 finite volume grid; 288 x 192 longitude/latitude; 32 levels; top level 2.25 mb); landIce: CISM2.1; ocnBgchem: MARBL (320x384 longitude/latitude; 60 levels; top grid cell 0-10 m)'

source_id = 'CESM2'

source_type = 'AOGCM BGC AER'

sub_experiment= 'none'

sub_experiment_id = 'none'

table_id= 'Emon'

tracking_id = 'hdl:21.14100/bf6bacfe-8e5b-435f-8aff-7aefda95ff9f'

variable_id = 'raShrub'

variant_info= 'CMIP6 SSP1-2.6 experiments (2015-2100) with CAM6, interactive land (CLM5), coupled ocean (POP2) with biogeochemistry (MARBL), interactive sea ice (CICE5.1), and non-evolving land ice (CISM2.1).'

variant_label = 'r11i1p1f1'

Dimensions:

lat = 192

hist_interval = 2

lon = 288

time= 600 (UNLIMITED)

Variables:

raShrub

Size: 288x192x600

Dimensions: lon,lat,time

Datatype: single

Attributes:

_FillValue= 1.000000020040877e+20

cell_measures = 'area: areacella'

cell_methods= 'area: time: mean where shrubs (comment: mask=shrubFrac)'

comment = 'chunits(CLM_pft_to_CMIP6_vegtype(AR,"shrub",time, lat, lon, grid1d_ixy, grid1d_jxy, grid1d_lon,grid1d_lat, land1d_lon, land1d_lat, land1d_ityplunit,pfts1d_lon, pfts1d_lat, pfts1d_active, pfts1d_itype_veg,pfts1d_wtgcell, pfts1d_wtlunit), units="g m-2 s-1")'

coordinates = 'time lat lon'

description = 'Total RA of shrubs in the grid cell'

frequency = 'mon'

id= 'raShrub'

long_name = 'Autotrophic Respiration on Shrub Tiles as Carbon Mass Flux [kgC m-2 s-1]'

mipTable= 'Emon'

missing_value = 1e+20

out_name= 'raShrub'

prov= 'C4MIP [C_LandT2]'

realm = 'land'

standard_name = 'surface_upward_mass_flux_of_carbon_dioxide_expressed_as_carbon_due_to_plant_respiration'

time= 'time'

time_label= 'time-mean'

time_title= 'Temporal mean'

title = 'Autotrophic Respiration on Shrub Tiles as Carbon Mass Flux [kgC m-2 s-1]'

type= 'real'

units = 'kg m-2 s-1'

variable_id = 'raShrub'

lat

Size: 192x1

Dimensions: lat

Datatype: double

Attributes:

axis= 'Y'

bounds= 'lat_bnds'

standard_name = 'latitude'

title = 'Latitude'

type= 'double'

units = 'degrees_north'

valid_max = 90

valid_min = -90

lon

Size: 288x1

Dimensions: lon

Datatype: double

Attributes:

axis= 'X'

bounds= 'lon_bnds'

standard_name = 'longitude'

title = 'Longitude'

type= 'double'

units = 'degrees_east'

valid_max = 360

valid_min = 0

time

Size: 600x1

Dimensions: time

Datatype: double

Attributes:

axis= 'T'

bounds= 'time_bnds'

standard_name = 'time'

title = 'time'

type= 'double'

units = 'days since 0001-01-01 00:00:00'

calendar= '365_day'

time_bnds

Size: 2x600

Dimensions: hist_interval,time

Datatype: double

Attributes:

calendar = 'noleap'

units= 'days since 0001-01-01 00:00:00'

lat_bnds

Size: 2x192

Dimensions: hist_interval,lat

Datatype: single

Attributes:

units = 'degrees_north'

lon_bnds

Size: 2x288

Dimensions: hist_interval,lon

Datatype: single

Attributes:

units = 'degrees_east'

**A-3 release from tree tiles as mass flux**

Format: netcdf4

Global Attributes:

Conventions = 'CF-1.7 CMIP-6.2'

activity_id = 'ScenarioMIP'

branch_method = 'standard'

branch_time_in_child= 735110

branch_time_in_parent = 735110

case_id = '1728'

cesm_casename = 'b.e21.BSSP126cmip6.f09_g17.CMIP6-SSP1-2.6.102'

contact = 'cesm_cmip6@ucar.edu'

creation_date = '2020-05-27T18:41:12Z'

data_specs_version= '01.00.31'

experiment= 'SSP-based RCP scenario with low radiative forcing by the end of the century.Following approximately RCP2.6 global forcing pathway with SSP1 socioeconomic conditions. Radiative forcing reaches a level of 2.6 W/m2 in 2100. Concentration-driven.'

experiment_id = 'ssp126'

external_variables= 'areacella'

forcing_index = 1

frequency = 'mon'

further_info_url= 'https://furtherinfo.es-doc.org/CMIP6.NCAR.CESM2.ssp126.none.r11i1p1f1'

grid= 'native 0.9x1.25 finite volume grid (192x288 latxlon)'

grid_label= 'gn'

initialization_index= 1

institution = 'National Center for Atmospheric Research, Climate and Global Dynamics Laboratory, 1850 Table Mesa Drive, Boulder, CO 80305, USA'

institution_id= 'NCAR'

license = 'CMIP6 model data produced by <The National Center for Atmospheric Research> is licensed under a Creative Commons Attribution-[]ShareAlike 4.0 International License (https://creativecommons.org/licenses/). Consult https://pcmdi.llnl.gov/CMIP6/TermsOfUse for terms of use governing CMIP6 output, including citation requirements and proper acknowledgment. Further information about this data, including some limitations, can be found via the further_info_url (recorded as a global attribute in this file)[]. The data producers and data providers make no warranty, either express or implied, including, but not limited to, warranties of merchantability and fitness for a particular purpose. All liabilities arising from the supply of the information (including any liability arising in negligence) are excluded to the fullest extent permitted by law.'

mip_era = 'CMIP6'

model_doi_url = 'https://doi.org/10.5065/D67H1H0V'

nominal_resolution= '100 km'

parent_activity_id= 'CMIP'

parent_experiment_id= 'historical'

parent_mip_era= 'CMIP6'

parent_source_id= 'CESM2'

parent_time_units = 'days since 0001-01-01 00:00:00'

parent_variant_label= 'r11i1p1f1'

physics_index = 1

product = 'model-output'

realization_index = 11

realm = 'land'

source= 'CESM2 (2017): atmosphere: CAM6 (0.9x1.25 finite volume grid; 288 x 192 longitude/latitude; 32 levels; top level 2.25 mb); ocean: POP2 (320x384 longitude/latitude; 60 levels; top grid cell 0-10 m); sea_ice: CICE5.1 (same grid as ocean); land: CLM5 0.9x1.25 finite volume grid; 288 x 192 longitude/latitude; 32 levels; top level 2.25 mb); aerosol: MAM4 (0.9x1.25 finite volume grid; 288 x 192 longitude/latitude; 32 levels; top level 2.25 mb); atmoschem: MAM4 (0.9x1.25 finite volume grid; 288 x 192 longitude/latitude; 32 levels; top level 2.25 mb); landIce: CISM2.1; ocnBgchem: MARBL (320x384 longitude/latitude; 60 levels; top grid cell 0-10 m)'

source_id = 'CESM2'

source_type = 'AOGCM BGC AER'

sub_experiment= 'none'

sub_experiment_id = 'none'

table_id= 'Emon'

tracking_id = 'hdl:21.14100/8e341352-c4d7-42d4-825a-7fcf86cf826b'

variable_id = 'raTree'

variant_info= 'CMIP6 SSP1-2.6 experiments (2015-2100) with CAM6, interactive land (CLM5), coupled ocean (POP2) with biogeochemistry (MARBL), interactive sea ice (CICE5.1), and non-evolving land ice (CISM2.1).'

variant_label = 'r11i1p1f1'

Dimensions:

lat = 192

hist_interval = 2

lon = 288

time= 600 (UNLIMITED)

Variables:

raTree

Size: 288x192x600

Dimensions: lon,lat,time

Datatype: single

Attributes:

_FillValue= 1.000000020040877e+20

cell_measures = 'area: areacella'

cell_methods= 'area: time: mean where trees (comment: mask=treeFrac)'

comment = 'chunits(CLM_pft_to_CMIP6_vegtype(AR,"tree",time, lat, lon, grid1d_ixy, grid1d_jxy, grid1d_lon,grid1d_lat, land1d_lon, land1d_lat, land1d_ityplunit,pfts1d_lon, pfts1d_lat, pfts1d_active, pfts1d_itype_veg,pfts1d_wtgcell, pfts1d_wtlunit), units="g m-2 s-1")'

coordinates = 'time lat lon'

description = 'Total RA of trees in the grid cell'

frequency = 'mon'

id= 'raTree'

long_name = 'Autotrophic Respiration on Tree Tiles as Carbon Mass Flux [kgC m-2 s-1]'

mipTable= 'Emon'

missing_value = 1e+20

out_name= 'raTree'

prov= 'C4MIP [C_LandT2]'

realm = 'land'

standard_name = 'surface_upward_mass_flux_of_carbon_dioxide_expressed_as_carbon_due_to_plant_respiration'

time= 'time'

time_label= 'time-mean'

time_title= 'Temporal mean'

title = 'Autotrophic Respiration on Tree Tiles as Carbon Mass Flux [kgC m-2 s-1]'

type= 'real'

units = 'kg m-2 s-1'

variable_id = 'raTree'

lat

Size: 192x1

Dimensions: lat

Datatype: double

Attributes:

axis= 'Y'

bounds= 'lat_bnds'

standard_name = 'latitude'

title = 'Latitude'

type= 'double'

units = 'degrees_north'

valid_max = 90

valid_min = -90

lon

Size: 288x1

Dimensions: lon

Datatype: double

Attributes:

axis= 'X'

bounds= 'lon_bnds'

standard_name = 'longitude'

title = 'Longitude'

type= 'double'

units = 'degrees_east'

valid_max = 360

valid_min = 0

time

Size: 600x1

Dimensions: time

Datatype: double

Attributes:

axis= 'T'

bounds= 'time_bnds'

standard_name = 'time'

title = 'time'

type= 'double'

units = 'days since 0001-01-01 00:00:00'

calendar= '365_day'

time_bnds

Size: 2x600

Dimensions: hist_interval,time

Datatype: double

Attributes:

calendar = 'noleap'

units= 'days since 0001-01-01 00:00:00'

lat_bnds

Size: 2x192

Dimensions: hist_interval,lat

Datatype: single

Attributes:

units = 'degrees_north'

lon_bnds

Size: 2x288

Dimensions: hist_interval,lon

Datatype: single

Attributes:

units = 'degrees_east'

**A-4 release from wasteland tiles as mass flux**

Format: netcdf4_classic

Global Attributes:

Conventions = 'CF-1.7 CMIP-6.2'

activity_id = 'ScenarioMIP'

branch_method = 'standard'

branch_time_in_child= 60265

branch_time_in_parent = 60265

contact = 'cmip6-mpi-esm@dkrz.de'

creation_date = '2019-10-29T16:24:02Z'

data_specs_version= '01.00.30'

experiment= 'update of RCP2.6 based on SSP1'

experiment_id = 'ssp126'

external_variables= 'areacella'

forcing_index = 1

frequency = 'mon'

further_info_url= 'https://furtherinfo.es-doc.org/CMIP6.MPI-M.MPI-ESM1-2-LR.ssp126.none.r1i1p1f1'

grid= 'gn'

grid_label= 'gn'

history = '2019-10-29T16:24:02Z ; CMOR rewrote data to be consistent with CMIP6, CF-1.7 CMIP-6.2 and CF standards.'

initialization_index= 1

institution = 'Max Planck Institute for Meteorology, Hamburg 20146, Germany'

institution_id= 'MPI-M'

mip_era = 'CMIP6'

nominal_resolution= '250 km'

parent_activity_id= 'CMIP'

parent_experiment_id= 'historical'

parent_mip_era= 'CMIP6'

parent_source_id= 'MPI-ESM1-2-LR'

parent_time_units = 'days since 1850-1-1 00:00:00'

parent_variant_label= 'r1i1p1f1'

physics_index = 1

product = 'model-output'

project_id= 'CMIP6'

realization_index = 1

realm = 'land'

references= 'MPI-ESM: Mauritsen, T. et al. (2019), Developments in the MPI‐M Earth System Model version 1.2 (MPI‐ESM1.2) and Its Response to Increasing CO2, J. Adv. Model. Earth Syst.,11, 998-1038, doi:10.1029/2018MS001400,

Mueller, W.A. et al. (2018): A high‐resolution version of the Max Planck Institute Earth System Model MPI‐ESM1.2‐HR. J. Adv. Model. EarthSyst.,10,1383–1413, doi:10.1029/2017MS001217'

source= 'MPI-ESM1.2-LR (2017):

aerosol: none, prescribed MACv2-SP

atmos: ECHAM6.3 (spectral T63; 192 x 96 longitude/latitude; 47 levels; top level 0.01 hPa)

atmosChem: none

land: JSBACH3.20

landIce: none/prescribed

ocean: MPIOM1.63 (bipolar GR1.5, approximately 1.5deg; 256 x 220 longitude/latitude; 40 levels; top grid cell 0-12 m)

ocnBgchem: HAMOCC6

seaIce: unnamed (thermodynamic (Semtner zero-layer) dynamic (Hibler 79) sea ice model)'

source_id = 'MPI-ESM1-2-LR'

source_type = 'AOGCM'

sub_experiment= 'none'

sub_experiment_id = 'none'

table_id= 'Emon'

table_info= 'Creation Date:(09 May 2019) MD5:e6ef8ececc8f338646ebfb3aeed36bfc'

title = 'MPI-ESM1-2-LR output prepared for CMIP6'

variable_id = 'nLand'

variant_label = 'r1i1p1f1'

license = 'CMIP6 model data produced by MPI-M is licensed under a Creative Commons Attribution ShareAlike 4.0 International License (https://creativecommons.org/licenses). Consult https://pcmdi.llnl.gov/CMIP6/TermsOfUse for terms of use governing CMIP6 output, including citation requirements and proper acknowledgment. Further information about this data, including some limitations, can be found via the further_info_url (recorded as a global attribute in this file) and. The data producers and data providers make no warranty, either express or implied, including, but not limited to, warranties of merchantability and fitness for a particular purpose. All liabilities arising from the supply of the information (including any liability arising in negligence) are excluded to the fullest extent permitted by law.'

cmor_version= '3.5.0'

tracking_id = 'hdl:21.14100/e960d134-aa84-46d1-89dc-ee9814c9dde2'

Dimensions:

time = 240 (UNLIMITED)

lat= 96

lon= 192

bnds = 2

Variables:

time

Size: 240x1

Dimensions: time

Datatype: double

Attributes:

bounds= 'time_bnds'

units = 'days since 1850-1-1 00:00:00'

calendar= 'proleptic_gregorian'

axis= 'T'

long_name = 'time'

standard_name = 'time'

time_bnds

Size: 2x240

Dimensions: bnds,time

Datatype: double

lat

Size: 96x1

Dimensions: lat

Datatype: double

Attributes:

bounds= 'lat_bnds'

units = 'degrees_north'

axis= 'Y'

long_name = 'Latitude'

standard_name = 'latitude'

lat_bnds

Size: 2x96

Dimensions: bnds,lat

Datatype: double

lon

Size: 192x1

Dimensions: lon

Datatype: double

Attributes:

bounds= 'lon_bnds'

units = 'degrees_east'

axis= 'X'

long_name = 'Longitude'

standard_name = 'longitude'

lon_bnds

Size: 2x192

Dimensions: bnds,lon

Datatype: double

nLand

Size: 192x96x240

Dimensions: lon,lat,time

Datatype: single

Attributes:

standard_name = 'mass_content_of_nitrogen_in_vegetation_and_litter_and_soil_and_forestry_and_agricultural_products'

long_name = 'Total Nitrogen in All Terrestrial Nitrogen Pools'

comment = 'Report missing data over ocean grid cells. For fractional land report value averaged over the land fraction.'

units = 'kg m-2'

original_name = 'nLand'

cell_methods= 'area: mean where land time: mean'

cell_measures = 'area: areacella'

history = '2019-10-29T16:24:02Z altered by CMOR: replaced missing value flag (-9e+33) and corresponding data with standard missing value (1e+20). 2019-10-29T16:24:03Z altered by CMOR: Inverted axis: lat.'

missing_value = 1.000000020040877e+20

_FillValue= 1.000000020040877e+20

**B-1 dry and wet deposition onto land**

Format: netcdf4

Global Attributes:

Conventions = 'CF-1.7 CMIP-6.2'

activity_id = 'ScenarioMIP'

branch_method = 'standard'

branch_time_in_child= 735110

branch_time_in_parent = 735110

case_id = '1728'

cesm_casename = 'b.e21.BSSP126cmip6.f09_g17.CMIP6-SSP1-2.6.102'

contact = 'cesm_cmip6@ucar.edu'

creation_date = '2020-05-27T19:00:44Z'

data_specs_version= '01.00.31'

experiment= 'SSP-based RCP scenario with low radiative forcing by the end of the century.Following approximately RCP2.6 global forcing pathway with SSP1 socioeconomic conditions. Radiative forcing reaches a level of 2.6 W/m2 in 2100. Concentration-driven.'

experiment_id = 'ssp126'

external_variables= 'areacella'

forcing_index = 1

frequency = 'mon'

further_info_url= 'https://furtherinfo.es-doc.org/CMIP6.NCAR.CESM2.ssp126.none.r11i1p1f1'

grid= 'native 0.9x1.25 finite volume grid (192x288 latxlon)'

grid_label= 'gn'

initialization_index= 1

institution = 'National Center for Atmospheric Research, Climate and Global Dynamics Laboratory, 1850 Table Mesa Drive, Boulder, CO 80305, USA'

institution_id= 'NCAR'

license = 'CMIP6 model data produced by <The National Center for Atmospheric Research> is licensed under a Creative Commons Attribution-[]ShareAlike 4.0 International License (https://creativecommons.org/licenses/). Consult https://pcmdi.llnl.gov/CMIP6/TermsOfUse for terms of use governing CMIP6 output, including citation requirements and proper acknowledgment. Further information about this data, including some limitations, can be found via the further_info_url (recorded as a global attribute in this file)[]. The data producers and data providers make no warranty, either express or implied, including, but not limited to, warranties of merchantability and fitness for a particular purpose. All liabilities arising from the supply of the information (including any liability arising in negligence) are excluded to the fullest extent permitted by law.'

mip_era = 'CMIP6'

model_doi_url = 'https://doi.org/10.5065/D67H1H0V'

nominal_resolution= '100 km'

parent_activity_id= 'CMIP'

parent_experiment_id= 'historical'

parent_mip_era= 'CMIP6'

parent_source_id= 'CESM2'

parent_time_units = 'days since 0001-01-01 00:00:00'

parent_variant_label= 'r11i1p1f1'

physics_index = 1

product = 'model-output'

realization_index = 11

realm = 'land'

source= 'CESM2 (2017): atmosphere: CAM6 (0.9x1.25 finite volume grid; 288 x 192 longitude/latitude; 32 levels; top level 2.25 mb); ocean: POP2 (320x384 longitude/latitude; 60 levels; top grid cell 0-10 m); sea_ice: CICE5.1 (same grid as ocean); land: CLM5 0.9x1.25 finite volume grid; 288 x 192 longitude/latitude; 32 levels; top level 2.25 mb); aerosol: MAM4 (0.9x1.25 finite volume grid; 288 x 192 longitude/latitude; 32 levels; top level 2.25 mb); atmoschem: MAM4 (0.9x1.25 finite volume grid; 288 x 192 longitude/latitude; 32 levels; top level 2.25 mb); landIce: CISM2.1; ocnBgchem: MARBL (320x384 longitude/latitude; 60 levels; top grid cell 0-10 m)'

source_id = 'CESM2'

source_type = 'AOGCM BGC AER'

sub_experiment= 'none'

sub_experiment_id = 'none'

table_id= 'Emon'

tracking_id = 'hdl:21.14100/5ce69c4d-2fed-4d10-aaad-c04c765e5d18'

variable_id = 'fNdep'

variant_info= 'CMIP6 SSP1-2.6 experiments (2015-2100) with CAM6, interactive land (CLM5), coupled ocean (POP2) with biogeochemistry (MARBL), interactive sea ice (CICE5.1), and non-evolving land ice (CISM2.1).'

variant_label = 'r11i1p1f1'

Dimensions:

lat = 192

hist_interval = 2

lon = 288

time= 600 (UNLIMITED)

Variables:

fNdep

Size: 288x192x600

Dimensions: lon,lat,time

Datatype: single

Attributes:

_FillValue= 1.000000020040877e+20

cell_measures = 'area: areacella'

cell_methods= 'area: mean where land time: mean'

comment = 'chunits(NDEP_TO_SMINN, units="g m-2 s-1")'

coordinates = 'time lat lon'

description = 'Surface deposition rate of nitrogen.'

frequency = 'mon'

id= 'fNdep'

long_name = 'Dry and Wet Deposition of Reactive Nitrogen onto Land'

mipTable= 'Emon'

missing_value = 1e+20

out_name= 'fNdep'

prov= 'C4MIP [C_LandT1]'

realm = 'land'

standard_name = 'minus_tendency_of_atmosphere_mass_content_of_nitrogen_compounds_expressed_as_nitrogen_due_to_deposition'

time= 'time'

time_label= 'time-mean'

time_title= 'Temporal mean'

title = 'Dry and Wet Deposition of Reactive Nitrogen onto Land'

type= 'real'

units = 'kg m-2 s-1'

variable_id = 'fNdep'

lat

Size: 192x1

Dimensions: lat

Datatype: double

Attributes:

axis= 'Y'

bounds= 'lat_bnds'

standard_name = 'latitude'

title = 'Latitude'

type= 'double'

units = 'degrees_north'

valid_max = 90

valid_min = -90

lon

Size: 288x1

Dimensions: lon

Datatype: double

Attributes:

axis= 'X'

bounds= 'lon_bnds'

standard_name = 'longitude'

title = 'Longitude'

type= 'double'

units = 'degrees_east'

valid_max = 360

valid_min = 0

time

Size: 600x1

Dimensions: time

Datatype: double

Attributes:

axis= 'T'

bounds= 'time_bnds'

standard_name = 'time'

title = 'time'

type= 'double'

units = 'days since 0001-01-01 00:00:00'

calendar= '365_day'

time_bnds

Size: 2x600

Dimensions: hist_interval,time

Datatype: double

Attributes:

calendar = 'noleap'

units= 'days since 0001-01-01 00:00:00'

lat_bnds

Size: 2x192

Dimensions: hist_interval,lat

Datatype: single

Attributes:

units = 'degrees_north'

lon_bnds

Size: 2x288

Dimensions: hist_interval,lon

Datatype: single

Attributes:

units = 'degrees_east'

**B-2 dry deposition rate of nh3**

Format: netcdf4

Global Attributes:

Conventions = 'CF-1.7 CMIP-6.2'

activity_id = 'ScenarioMIP'

branch_method = 'standard'

branch_time_in_child= 735110

branch_time_in_parent = 735110

case_id = '966'

cesm_casename = 'b.e21.BWSSP245cmip6.f09_g17.CMIP6-SSP2-4.5-WACCM.001'

contact = 'cesm_cmip6@ucar.edu'

creation_date = '2019-03-31T16:00:33Z'

data_specs_version= '01.00.29'

experiment= 'SSP-based RCP scenario with medium radiative forcing by the end of the century.Following approximately RCP4.5 global forcing pathway with SSP2 socioeconomic conditions. Radiative forcing reaches a level of 4.5 W/m2 in 2100. Concentration-driven.'

experiment_id = 'ssp245'

external_variables= 'areacella'

forcing_index = 1

frequency = 'mon'

further_info_url= 'https://furtherinfo.es-doc.org/CMIP6.NCAR.CESM2-WACCM.ssp245.none.r1i1p1f1'

grid= 'native 0.9x1.25 finite volume grid (192x288 latxlon)'

grid_label= 'gn'

initialization_index= 1

institution = 'National Center for Atmospheric Research, Climate and Global Dynamics Laboratory, 1850 Table Mesa Drive, Boulder, CO 80305, USA'

institution_id= 'NCAR'

license = 'CMIP6 model data produced by <The National Center for Atmospheric Research> is licensed under a Creative Commons Attribution-[]ShareAlike 4.0 International License (https://creativecommons.org/licenses/). Consult https://pcmdi.llnl.gov/CMIP6/TermsOfUse for terms of use governing CMIP6 output, including citation requirements and proper acknowledgment. Further information about this data, including some limitations, can be found via the further_info_url (recorded as a global attribute in this file)[]. The data producers and data providers make no warranty, either express or implied, including, but not limited to, warranties of merchantability and fitness for a particular purpose. All liabilities arising from the supply of the information (including any liability arising in negligence) are excluded to the fullest extent permitted by law.'

mip_era = 'CMIP6'

model_doi_url = 'https://doi.org/10.5065/D67H1H0V'

nominal_resolution= '100 km'

parent_activity_id= 'CMIP'

parent_experiment_id= 'historical'

parent_mip_era= 'CMIP6'

parent_source_id= 'CESM2-WACCM'

parent_time_units = 'days since 0001-01-01 00:00:00'

parent_variant_label= 'r1i1p1f1'

physics_index = 1

product = 'model-output'

realization_index = 1

realm = 'aerosol'

source= 'CESM2 (2017): atmosphere: CAM6 (0.9x1.25 finite volume grid; 288 x 192 longitude/latitude; 70 levels; top level 4.5e-6 mb); ocean: POP2 (320x384 longitude/latitude; 60 levels; top grid cell 0-10 m); sea_ice: CICE5.1 (same grid as ocean); land: CLM5 0.9x1.25 finite volume grid; 288 x 192 longitude/latitude; 70 levels; top level 4.5e-6 mb); aerosol: MAM4 (0.9x1.25 finite volume grid; 288 x 192 longitude/latitude; 70 levels; top level 4.5e-6 mb); atmosChem: WACCM (0.9x1.25 finite volume grid; 288 x 192 longitude/latitude; 70 levels; top level 4.5e-6 mb; landIce: CISM2.1; ocnBgchem: MARBL (320x384 longitude/latitude; 60 levels; top grid cell 0-10 m)'

source_id = 'CESM2-WACCM'

source_type = 'AOGCM BGC CHEM AER'

sub_experiment= 'none'

sub_experiment_id = 'none'

table_id= 'AERmon'

tracking_id = 'hdl:21.14100/81fc97f4-3559-4a5f-90e0-fb5ec25d1ae7'

variable_id = 'drynh3'

variant_info= 'CMIP6 CESM2 future scenario SSP2-4.5, years 2015-2100, with WACCM6 with interactive chemistry (TSMLT1), interactive land (CLM5), coupled ocean (POP2) with biogeochemistry (MARBL), interactive sea ice (CICE5.1), and non-evolving land ice (CISM2.1).'

variant_label = 'r1i1p1f1'

Dimensions:

lat= 192

nbnd = 2

lon= 288

time = 600 (UNLIMITED)

Variables:

drynh3

Size: 288x192x600

Dimensions: lon,lat,time

Datatype: single

Attributes:

_FillValue= 1.000000020040877e+20

cell_measures = 'area: areacella'

cell_methods= 'area: time: mean'

comment = 'DF_NH3'

coordinates = 'time lat lon'

description = 'dry deposition includes gravitational settling, impact scavenging, and turbulent deposition'

frequency = 'mon'

id= 'drynh3'

long_name = 'Dry Deposition Rate of NH3'

mipTable= 'AERmon'

missing_value = 1e+20

out_name= 'drynh3'

prov= 'AERmon ((isd.003))'

realm = 'aerosol'

standard_name = 'minus_tendency_of_atmosphere_mass_content_of_ammonia_due_to_dry_deposition'

time= 'time'

time_label= 'time-mean'

time_title= 'Temporal mean'

title = 'Dry Deposition Rate of NH3'

type= 'real'

units = 'kg m-2 s-1'

variable_id = 'drynh3'

lat

Size: 192x1

Dimensions: lat

Datatype: double

Attributes:

axis= 'Y'

bounds= 'lat_bnds'

standard_name = 'latitude'

title = 'Latitude'

type= 'double'

units = 'degrees_north'

valid_max = 90

valid_min = -90

lon

Size: 288x1

Dimensions: lon

Datatype: double

Attributes:

axis= 'X'

bounds= 'lon_bnds'

standard_name = 'longitude'

title = 'Longitude'

type= 'double'

units = 'degrees_east'

valid_max = 360

valid_min = 0

time

Size: 600x1

Dimensions: time

Datatype: double

Attributes:

axis= 'T'

bounds= 'time_bnds'

standard_name = 'time'

title = 'time'

type= 'double'

units = 'days since 0001-01-01 00:00:00'

calendar= 'noleap'

time_bnds

Size: 2x600

Dimensions: nbnd,time

Datatype: double

Attributes:

calendar = 'noleap'

units= 'days since 0001-01-01 00:00:00'

lat_bnds

Size: 2x192

Dimensions: nbnd,lat

Datatype: double

Attributes:

units = 'degrees_north'

lon_bnds

Size: 2x288

Dimensions: nbnd,lon

Datatype: double

Attributes:

units = 'degrees_east'

**B-3 dry deposition rate of noy**

Format: netcdf4_classic

Global Attributes:

external_variables= 'areacella'

history = 'File was processed by fremetar (GFDL analog of CMOR). TripleID: [exper_id_yNUt7Z2sYG,realiz_id_P3rVyzRXEK,run_id_VpSnhwtpUd]'

table_id= 'AERmon'

activity_id = 'ScenarioMIP'

branch_method = 'standard'

branch_time_in_child= 60225

branch_time_in_parent = 60225

comment = '<null ref>'

contact = 'gfdl.climate.model.info@noaa.gov'

Conventions = 'CF-1.7 CMIP-6.0 UGRID-1.0'

creation_date = '2019-06-19T11:33:17Z'

data_specs_version= '01.00.27'

experiment= 'update of RCP2.6 based on SSP1'

experiment_id = 'ssp126'

forcing_index = 1

frequency = 'mon'

further_info_url= 'https://furtherinfo.es-doc.org/CMIP6.NOAA-GFDL.GFDL-ESM4.ssp126.none.r1i1p1f1'

grid= 'atmos data regridded from Cubed-sphere (c96) to 180,288; interpolation method: conserve_order1'

grid_label= 'gr1'

initialization_index= 1

institution = 'National Oceanic and Atmospheric Administration, Geophysical Fluid Dynamics Laboratory, Princeton, NJ 08540, USA'

institution_id= 'NOAA-GFDL'

license = 'CMIP6 model data produced by NOAA-GFDL is licensed under a Creative Commons Attribution-ShareAlike 4.0 International License (https://creativecommons.org/licenses/). Consult https://pcmdi.llnl.gov/CMIP6/TermsOfUse for terms of use governing CMIP6 output, including citation requirements and proper acknowledgment. Further information about this data, including some limitations, can be found via the further_info_url (recorded as a global attribute in this file). The data producers and data providers make no warranty, either express or implied, including, but not limited to, warranties of merchantability and fitness for a particular purpose. All liabilities arising from the supply of the information (including any liability arising in negligence) are excluded to the fullest extent permitted by law.'

mip_era = 'CMIP6'

nominal_resolution= '100 km'

parent_activity_id= 'CMIP'

parent_experiment_id= 'historical'

parent_mip_era= 'CMIP6'

parent_source_id= 'GFDL-ESM4'

parent_time_units = 'days since 1850-1-1'

parent_variant_label= 'r1i1p1f1'

physics_index = 1

product = 'model-output'

realization_index = 1

realm = 'aerosol'

source= 'GFDL-ESM4 (2018):

atmos: GFDL-AM4.1 (Cubed-sphere (c96) - 1 degree nominal horizontal resolution; 360 x 180 longitude/latitude; 49 levels; top level 1 Pa)

ocean: GFDL-OM4p5 (GFDL-MOM6, tripolar - nominal 0.5 deg; 720 x 576 longitude/latitude; 75 levels; top grid cell 0-2 m)

seaIce: GFDL-SIM4p5 (GFDL-SIS2.0, tripolar - nominal 0.5 deg; 720 x 576 longitude/latitude; 5 layers; 5 thickness categories)

land: GFDL-LM4.1

aerosol: interactive

atmosChem: GFDL-ATMCHEM4.1 (full atmospheric chemistry)

ocnBgchem: GFDL-COBALTv2

landIce: GFDL-LM4.1

(GFDL ID: 2019_0303)'

source_id = 'GFDL-ESM4'

source_type = 'AOGCM AER CHEM BGC'

sub_experiment= 'none'

sub_experiment_id = 'none'

title = 'NOAA GFDL GFDL-ESM4 model output prepared for CMIP6 update of RCP2.6 based on SSP1'

tracking_id = 'hdl:21.14100/5f770796-846a-4240-ba8b-be638bf24be6'

variable_id = 'drynoy'

variant_info= 'N/A'

references= 'see further_info_url attribute'

variant_label = 'r1i1p1f1'

Dimensions:

bnds = 2

time = 1032(UNLIMITED)

lat= 180

lon= 288

Variables:

bnds

Size: 2x1

Dimensions: bnds

Datatype: double

Attributes:

long_name = 'vertex number'

drynoy

Size: 288x180x1032

Dimensions: lon,lat,time

Datatype: single

Attributes:

long_name = 'dry deposition rate of noy'

units = 'kg m-2 s-1'

missing_value = 1.000000020040877e+20

_FillValue= 1.000000020040877e+20

cell_methods= 'area: time: mean'

cell_measures = 'area: areacella'

standard_name = 'minus_tendency_of_atmosphere_mass_content_of_noy_expressed_as_nitrogen_due_to_dry_deposition'

interp_method = 'conserve_order1'

original_name = 'drynoy'

lat

Size: 180x1

Dimensions: lat

Datatype: double

Attributes:

long_name = 'latitude'

units = 'degrees_north'

axis= 'Y'

bounds= 'lat_bnds'

standard_name = 'latitude'

cell_methods= 'time: point'

lat_bnds

Size: 2x180

Dimensions: bnds,lat

Datatype: double

Attributes:

long_name = 'latitude bounds'

units = 'degrees_north'

axis= 'Y'

lon

Size: 288x1

Dimensions: lon

Datatype: double

Attributes:

long_name = 'longitude'

units = 'degrees_east'

axis= 'X'

bounds= 'lon_bnds'

standard_name = 'longitude'

cell_methods= 'time: point'

lon_bnds

Size: 2x288

Dimensions: bnds,lon

Datatype: double

Attributes:

long_name = 'longitude bounds'

units = 'degrees_east'

axis= 'X'

time

Size: 1032x1

Dimensions: time

Datatype: double

Attributes:

long_name = 'time'

units = 'days since 1850-01-01 00:00:00'

axis= 'T'

calendar_type = 'noleap'

calendar= 'noleap'

bounds= 'time_bnds'

standard_name = 'time'

description = 'Temporal mean'

time_bnds

Size: 2x1032

Dimensions: bnds,time

Datatype: double

Attributes:

long_name = 'time axis boundaries'

units = 'days since 1850-01-01 00:00:00'

**B-4 content of ammonia due to dry deposition**

Format: classic

Global Attributes:

Conventions = 'CF-1.7 CMIP-6.2'

activity_id = 'ScenarioMIP'

branch_method = 'standard'

branch_time_in_child= 0

branch_time_in_parent = 0

contact = 'Kenneth Lo (cdkkl@giss.nasa.gov)'

creation_date = '2020-04-09T00:21:26Z'

data_specs_version= '01.00.23'

experiment= 'low-end scenario reaching 1.9 W m-2, based on SSP1'

experiment_id = 'ssp119'

external_variables= 'areacella'

forcing_index = 1

frequency = 'mon'

further_info_url= 'https://furtherinfo.es-doc.org/CMIP6.NASA-GISS.GISS-E2-1-G.ssp119.none.r1i1p3f1'

grid= 'atmospheric grid: 144x90, ocean grid: 288x180'

grid_label= 'gn'

history = '2020-04-09T00:21:26Z ; CMOR rewrote data to be consistent with CMIP6, CF-1.7 CMIP-6.2 and CF standards.'

initialization_index= 1

institution = 'Goddard Institute for Space Studies, New York, NY 10025, USA'

institution_id= 'NASA-GISS'

mip_era = 'CMIP6'

model_id= 'E212TomaSSP119aF40oQ40'

nominal_resolution= '250 km'

parent_activity_id= 'CMIP'

parent_experiment_id= 'historical'

parent_experiment_rip = 'r1i1p3'

parent_mip_era= 'CMIP6'

parent_source_id= 'GISS-E2-1-G'

parent_time_units = 'days since 2015-1-1'

parent_variant_label= 'r1i1p3f1'

physics_index = 3

product = 'model-output'

realization_index = 1

realm = 'aerosol'

references= 'https://data.giss.nasa.gov/modelE/cmip6'

source= 'GISS-E2.1G (2019):

aerosol: Varies with physics-version (p==1 none, p==3 OMA, p==4 TOMAS, p==5 MATRIX)

atmos: GISS-E2.1 (2.5x2 degree; 144 x 90 longitude/latitude; 40 levels; top level 0.1 hPa)

atmosChem: Varies with physics-version (p==1 Non-interactive, p>1 GPUCCINI)

land: GISS LSM

landIce: none

ocean: GISS Ocean (GO1, 1 degree; 360 x 180 longitude/latitude; 40 levels; top grid cell 0-10 m)

ocnBgchem: none

seaIce: GISS SI'

source_id = 'GISS-E2-1-G'

source_type = 'AOGCM'

sub_experiment= 'none'

sub_experiment_id = 'none'

table_id= 'AERmon'

table_info= 'Creation Date:(21 March 2018) MD5:d211846f9d8f448e2718291a152c71ca'

title = 'GISS-E2-1-G output prepared for CMIP6'

tracking_id = 'hdl:21.14100/a1137466-3301-4921-8f2f-7be85e350c88'

variable_id = 'drynh3'

variant_label = 'r1i1p3f1'

license = 'CMIP6 model data produced by NASA Goddard Institute for Space Studies is licensed under a Creative Commons Attribution ShareAlike 4.0 International License (https://creativecommons.org/licenses). Consult https://pcmdi.llnl.gov/CMIP6/TermsOfUse for terms of use governing CMIP6 output, including citation requirements and proper acknowledgment. Further information about this data, including some limitations, can be found via the further_info_url (recorded as a global attribute in this file) and at https:///pcmdi.llnl.gov/. The data producers and data providers make no warranty, either express or implied, including, but not limited to, warranties of merchantability and fitness for a particular purpose. All liabilities arising from the supply of the information (including any liability arising in negligence) are excluded to the fullest extent permitted by law.'

cmor_version= '3.3.2'

Dimensions:

time = 432 (UNLIMITED)

lat= 90

lon= 144

bnds = 2

Variables:

time

Size: 432x1

Dimensions: time

Datatype: double

Attributes:

bounds= 'time_bnds'

units = 'days since 2015-1-1'

calendar= '365_day'

axis= 'T'

long_name = 'time'

standard_name = 'time'

time_bnds

Size: 2x432

Dimensions: bnds,time

Datatype: double

lat

Size: 90x1

Dimensions: lat

Datatype: double

Attributes:

bounds= 'lat_bnds'

units = 'degrees_north'

axis= 'Y'

long_name = 'latitude'

standard_name = 'latitude'

lat_bnds

Size: 2x90

Dimensions: bnds,lat

Datatype: double

lon

Size: 144x1

Dimensions: lon

Datatype: double

Attributes:

bounds= 'lon_bnds'

units = 'degrees_east'

axis= 'X'

long_name = 'longitude'

standard_name = 'longitude'

lon_bnds

Size: 2x144

Dimensions: bnds,lon

Datatype: double

drynh3

Size: 144x90x432

Dimensions: lon,lat,time

Datatype: single

Attributes:

standard_name = 'tendency_of_atmosphere_mass_content_of_ammonia_due_to_dry_deposition'

long_name = 'dry deposition rate of nh3'

comment = 'dry deposition includes gravitational settling, impact scavenging, and turbulent deposition'

units = 'kg m-2 s-1'

cell_methods= 'area: time: mean'

cell_measures = 'area: areacella'

history = '2020-04-09T00:21:26Z altered by CMOR: replaced missing value flag (-1e+30) with standard missing value (1e+20).'

missing_value = 1.000000020040877e+20

_FillValue= 1.000000020040877e+20

**B-5 content of ammonia due to wet deposition**

Format: classic

Global Attributes:

Conventions = 'CF-1.7 CMIP-6.2'

activity_id = 'ScenarioMIP'

branch_method = 'standard'

branch_time_in_child= 0

branch_time_in_parent = 0

contact = 'Kenneth Lo (cdkkl@giss.nasa.gov)'

creation_date = '2020-08-10T02:50:20Z'

data_specs_version= '01.00.23'

experiment= 'update of RCP2.6 based on SSP1'

experiment_id = 'ssp126'

external_variables= 'areacella'

forcing_index = 1

frequency = 'mon'

further_info_url= 'https://furtherinfo.es-doc.org/CMIP6.NASA-GISS.GISS-E2-1-G.ssp126.none.r1i1p5f1'

grid= 'atmospheric grid: 144x90, ocean grid: 288x180'

grid_label= 'gn'

history = '2020-08-10T02:50:20Z ; CMOR rewrote data to be consistent with CMIP6, CF-1.7 CMIP-6.2 and CF standards.'

initialization_index= 1

institution = 'Goddard Institute for Space Studies, New York, NY 10025, USA'

institution_id= 'NASA-GISS'

mip_era = 'CMIP6'

model_id= 'E214TmatrixSSP126aF40oQ40'

nominal_resolution= '250 km'

parent_activity_id= 'CMIP'

parent_experiment_id= 'historical'

parent_experiment_rip = 'r1i1p5'

parent_mip_era= 'CMIP6'

parent_source_id= 'GISS-E2-1-G'

parent_time_units = 'days since 2015-1-1'

parent_variant_label= 'r1i1p5f1'

physics_index = 5

product = 'model-output'

realization_index = 1

realm = 'aerosol'

references= 'https://data.giss.nasa.gov/modelE/cmip6'

source= 'GISS-E2.1G (2019):

aerosol: Varies with physics-version (p==1 none, p==3 OMA, p==4 TOMAS, p==5 MATRIX)

atmos: GISS-E2.1 (2.5x2 degree; 144 x 90 longitude/latitude; 40 levels; top level 0.1 hPa)

atmosChem: Varies with physics-version (p==1 Non-interactive, p>1 GPUCCINI)

land: GISS LSM

landIce: none

ocean: GISS Ocean (GO1, 1 degree; 360 x 180 longitude/latitude; 40 levels; top grid cell 0-10 m)

ocnBgchem: none

seaIce: GISS SI'

source_id = 'GISS-E2-1-G'

source_type = 'AOGCM'

sub_experiment= 'none'

sub_experiment_id = 'none'

table_id= 'AERmon'

table_info= 'Creation Date:(21 March 2018) MD5:d211846f9d8f448e2718291a152c71ca'

title = 'GISS-E2-1-G output prepared for CMIP6'

tracking_id = 'hdl:21.14100/52dfce08-497f-447a-a835-b56a6036f380'

variable_id = 'wetnh3'

variant_label = 'r1i1p5f1'

license = 'CMIP6 model data produced by NASA Goddard Institute for Space Studies is licensed under a Creative Commons Attribution ShareAlike 4.0 International License (https://creativecommons.org/licenses). Consult https://pcmdi.llnl.gov/CMIP6/TermsOfUse for terms of use governing CMIP6 output, including citation requirements and proper acknowledgment. Further information about this data, including some limitations, can be found via the further_info_url (recorded as a global attribute in this file) and at https:///pcmdi.llnl.gov/. The data producers and data providers make no warranty, either express or implied, including, but not limited to, warranties of merchantability and fitness for a particular purpose. All liabilities arising from the supply of the information (including any liability arising in negligence) are excluded to the fullest extent permitted by law.'

cmor_version= '3.3.2'

Dimensions:

time = 432 (UNLIMITED)

lat= 90

lon= 144

bnds = 2

Variables:

time

Size: 432x1

Dimensions: time

Datatype: double

Attributes:

bounds= 'time_bnds'

units = 'days since 2015-1-1'

calendar= '365_day'

axis= 'T'

long_name = 'time'

standard_name = 'time'

time_bnds

Size: 2x432

Dimensions: bnds,time

Datatype: double

lat

Size: 90x1

Dimensions: lat

Datatype: double

Attributes:

bounds= 'lat_bnds'

units = 'degrees_north'

axis= 'Y'

long_name = 'latitude'

standard_name = 'latitude'

lat_bnds

Size: 2x90

Dimensions: bnds,lat

Datatype: double

lon

Size: 144x1

Dimensions: lon

Datatype: double

Attributes:

bounds= 'lon_bnds'

units = 'degrees_east'

axis= 'X'

long_name = 'longitude'

standard_name = 'longitude'

lon_bnds

Size: 2x144

Dimensions: bnds,lon

Datatype: double

wetnh3

Size: 144x90x432

Dimensions: lon,lat,time

Datatype: single

Attributes:

standard_name = 'tendency_of_atmosphere_mass_content_of_ammonia_due_to_wet_deposition'

long_name = 'wet deposition rate of nh3'

comment = ''tendency_of_X' means derivative of X with respect to time.'Content' indicates a quantity per unit area.'Wet deposition' means deposition by precipitation.'

units = 'kg m-2 s-1'

cell_methods= 'area: time: mean'

cell_measures = 'area: areacella'

history = '2020-08-10T02:50:20Z altered by CMOR: replaced missing value flag (-1e+30) with standard missing value (1e+20).'

missing_value = 1.000000020040877e+20

_FillValue= 1.000000020040877e+20

**B-6 content of ammonia due to emission**

Format: classic

Global Attributes:

Conventions = 'CF-1.7 CMIP-6.2'

activity_id = 'ScenarioMIP'

branch_method = 'standard'

branch_time_in_child= 0

branch_time_in_parent = 0

contact = 'Kenneth Lo (cdkkl@giss.nasa.gov)'

creation_date = '2020-08-10T02:49:27Z'

data_specs_version= '01.00.23'

experiment= 'update of RCP2.6 based on SSP1'

experiment_id = 'ssp126'

external_variables= 'areacella'

forcing_index = 1

frequency = 'mon'

further_info_url= 'https://furtherinfo.es-doc.org/CMIP6.NASA-GISS.GISS-E2-1-G.ssp126.none.r1i1p5f1'

grid= 'atmospheric grid: 144x90, ocean grid: 288x180'

grid_label= 'gn'

history = '2020-08-10T02:49:27Z ; CMOR rewrote data to be consistent with CMIP6, CF-1.7 CMIP-6.2 and CF standards.'

initialization_index= 1

institution = 'Goddard Institute for Space Studies, New York, NY 10025, USA'

institution_id= 'NASA-GISS'

mip_era = 'CMIP6'

model_id= 'E214TmatrixSSP126aF40oQ40'

nominal_resolution= '250 km'

parent_activity_id= 'CMIP'

parent_experiment_id= 'historical'

parent_experiment_rip = 'r1i1p5'

parent_mip_era= 'CMIP6'

parent_source_id= 'GISS-E2-1-G'

parent_time_units = 'days since 2015-1-1'

parent_variant_label= 'r1i1p5f1'

physics_index = 5

product = 'model-output'

realization_index = 1

realm = 'aerosol'

references= 'https://data.giss.nasa.gov/modelE/cmip6'

source= 'GISS-E2.1G (2019):

aerosol: Varies with physics-version (p==1 none, p==3 OMA, p==4 TOMAS, p==5 MATRIX)

atmos: GISS-E2.1 (2.5x2 degree; 144 x 90 longitude/latitude; 40 levels; top level 0.1 hPa)

atmosChem: Varies with physics-version (p==1 Non-interactive, p>1 GPUCCINI)

land: GISS LSM

landIce: none

ocean: GISS Ocean (GO1, 1 degree; 360 x 180 longitude/latitude; 40 levels; top grid cell 0-10 m)

ocnBgchem: none

seaIce: GISS SI'

source_id = 'GISS-E2-1-G'

source_type = 'AOGCM'

sub_experiment= 'none'

sub_experiment_id = 'none'

table_id= 'AERmon'

table_info= 'Creation Date:(21 March 2018) MD5:d211846f9d8f448e2718291a152c71ca'

title = 'GISS-E2-1-G output prepared for CMIP6'

tracking_id = 'hdl:21.14100/80182dfc-9125-48ed-a201-61a92c14bb6d'

variable_id = 'eminh3'

variant_label = 'r1i1p5f1'

license = 'CMIP6 model data produced by NASA Goddard Institute for Space Studies is licensed under a Creative Commons Attribution ShareAlike 4.0 International License (https://creativecommons.org/licenses). Consult https://pcmdi.llnl.gov/CMIP6/TermsOfUse for terms of use governing CMIP6 output, including citation requirements and proper acknowledgment. Further information about this data, including some limitations, can be found via the further_info_url (recorded as a global attribute in this file) and at https:///pcmdi.llnl.gov/. The data producers and data providers make no warranty, either express or implied, including, but not limited to, warranties of merchantability and fitness for a particular purpose. All liabilities arising from the supply of the information (including any liability arising in negligence) are excluded to the fullest extent permitted by law.'

cmor_version= '3.3.2'

Dimensions:

time = 432 (UNLIMITED)

lat= 90

lon= 144

bnds = 2

Variables:

time

Size: 432x1

Dimensions: time

Datatype: double

Attributes:

bounds= 'time_bnds'

units = 'days since 2015-1-1'

calendar= '365_day'

axis= 'T'

long_name = 'time'

standard_name = 'time'

time_bnds

Size: 2x432

Dimensions: bnds,time

Datatype: double

lat

Size: 90x1

Dimensions: lat

Datatype: double

Attributes:

bounds= 'lat_bnds'

units = 'degrees_north'

axis= 'Y'

long_name = 'latitude'

standard_name = 'latitude'

lat_bnds

Size: 2x90

Dimensions: bnds,lat

Datatype: double

lon

Size: 144x1

Dimensions: lon

Datatype: double

Attributes:

bounds= 'lon_bnds'

units = 'degrees_east'

axis= 'X'

long_name = 'longitude'

standard_name = 'longitude'

lon_bnds

Size: 2x144

Dimensions: bnds,lon

Datatype: double

eminh3

Size: 144x90x432

Dimensions: lon,lat,time

Datatype: single

Attributes:

standard_name = 'tendency_of_atmosphere_mass_content_of_ammonia_due_to_emission'

long_name = 'total emission rate of nh3'

comment = 'Integrate 3D emission field vertically to 2d field.'

units = 'kg m-2 s-1'

cell_methods= 'area: time: mean'

cell_measures = 'area: areacella'

history = '2020-08-10T02:49:27Z altered by CMOR: replaced missing value flag (-1e+30) with standard missing value (1e+20).'

missing_value = 1.000000020040877e+20

_FillValue= 1.000000020040877e+20

**B-7 content of nitrogen due to emission**

Format: classic

Global Attributes:

Conventions = 'CF-1.7 CMIP-6.2'

activity_id = 'ScenarioMIP'

branch_method = 'standard'

branch_time_in_child= 0

branch_time_in_parent = 0

contact = 'Kenneth Lo (cdkkl@giss.nasa.gov)'

creation_date = '2020-08-10T02:49:30Z'

data_specs_version= '01.00.23'

experiment= 'update of RCP2.6 based on SSP1'

experiment_id = 'ssp126'

external_variables= 'areacella'

forcing_index = 1

frequency = 'mon'

further_info_url= 'https://furtherinfo.es-doc.org/CMIP6.NASA-GISS.GISS-E2-1-G.ssp126.none.r1i1p5f1'

grid= 'atmospheric grid: 144x90, ocean grid: 288x180'

grid_label= 'gn'

history = '2020-08-10T02:49:30Z ; CMOR rewrote data to be consistent with CMIP6, CF-1.7 CMIP-6.2 and CF standards.'

initialization_index= 1

institution = 'Goddard Institute for Space Studies, New York, NY 10025, USA'

institution_id= 'NASA-GISS'

mip_era = 'CMIP6'

model_id= 'E214TmatrixSSP126aF40oQ40'

nominal_resolution= '250 km'

parent_activity_id= 'CMIP'

parent_experiment_id= 'historical'

parent_experiment_rip = 'r1i1p5'

parent_mip_era= 'CMIP6'

parent_source_id= 'GISS-E2-1-G'

parent_time_units = 'days since 2015-1-1'

parent_variant_label= 'r1i1p5f1'

physics_index = 5

product = 'model-output'

realization_index = 1

realm = 'aerosol'

references= 'https://data.giss.nasa.gov/modelE/cmip6'

source= 'GISS-E2.1G (2019):

aerosol: Varies with physics-version (p==1 none, p==3 OMA, p==4 TOMAS, p==5 MATRIX)

atmos: GISS-E2.1 (2.5x2 degree; 144 x 90 longitude/latitude; 40 levels; top level 0.1 hPa)

atmosChem: Varies with physics-version (p==1 Non-interactive, p>1 GPUCCINI)

land: GISS LSM

landIce: none

ocean: GISS Ocean (GO1, 1 degree; 360 x 180 longitude/latitude; 40 levels; top grid cell 0-10 m)

ocnBgchem: none

seaIce: GISS SI'

source_id = 'GISS-E2-1-G'

source_type = 'AOGCM'

sub_experiment= 'none'

sub_experiment_id = 'none'

table_id= 'AERmon'

table_info= 'Creation Date:(21 March 2018) MD5:d211846f9d8f448e2718291a152c71ca'

title = 'GISS-E2-1-G output prepared for CMIP6'

tracking_id = 'hdl:21.14100/0bd65971-fb94-4983-92c5-11680468ca12'

variable_id = 'emianox'

variant_label = 'r1i1p5f1'

license = 'CMIP6 model data produced by NASA Goddard Institute for Space Studies is licensed under a Creative Commons Attribution ShareAlike 4.0 International License (https://creativecommons.org/licenses). Consult https://pcmdi.llnl.gov/CMIP6/TermsOfUse for terms of use governing CMIP6 output, including citation requirements and proper acknowledgment. Further information about this data, including some limitations, can be found via the further_info_url (recorded as a global attribute in this file) and at https:///pcmdi.llnl.gov/. The data producers and data providers make no warranty, either express or implied, including, but not limited to, warranties of merchantability and fitness for a particular purpose. All liabilities arising from the supply of the information (including any liability arising in negligence) are excluded to the fullest extent permitted by law.'

cmor_version= '3.3.2'

Dimensions:

time = 432 (UNLIMITED)

lat= 90

lon= 144

bnds = 2

Variables:

time

Size: 432x1

Dimensions: time

Datatype: double

Attributes:

bounds= 'time_bnds'

units = 'days since 2015-1-1'

calendar= '365_day'

axis= 'T'

long_name = 'time'

standard_name = 'time'

time_bnds

Size: 2x432

Dimensions: bnds,time

Datatype: double

lat

Size: 90x1

Dimensions: lat

Datatype: double

Attributes:

bounds= 'lat_bnds'

units = 'degrees_north'

axis= 'Y'

long_name = 'latitude'

standard_name = 'latitude'

lat_bnds

Size: 2x90

Dimensions: bnds,lat

Datatype: double

lon

Size: 144x1

Dimensions: lon

Datatype: double

Attributes:

bounds= 'lon_bnds'

units = 'degrees_east'

axis= 'X'

long_name = 'longitude'

standard_name = 'longitude'

lon_bnds

Size: 2x144

Dimensions: bnds,lon

Datatype: double

emianox

Size: 144x90x432

Dimensions: lon,lat,time

Datatype: single

Attributes:

standard_name = 'tendency_of_atmosphere_mass_content_of_nox_expressed_as_nitrogen_due_to_emission'

long_name = 'anthropogenic emission rate of nox'

comment = 'Store flux as Nitrogen. Anthropogenic fraction. NOx=NO+NO2, Includes agricultural waste burning but no other biomass burning. Integrate 3D emission field vertically to 2d field.'

units = 'kg m-2 s-1'

cell_methods= 'area: time: mean'

cell_measures = 'area: areacella'

history = '2020-08-10T02:49:30Z altered by CMOR: replaced missing value flag (-1e+30) with standard missing value (1e+20).'

missing_value = 1.000000020040877e+20

_FillValue= 1.000000020040877e+20

**C-1 mineral ammonium in the soil**

Format: netcdf4_classic

Global Attributes:

Conventions = 'CF-1.7 CMIP-6.2'

activity_id = 'ScenarioMIP'

branch_method= 'Hybrid-restart from year 2015-01-01 of historical'

branch_time = 0

branch_time_in_child = 0

branch_time_in_parent= 60225

contact = 'Please send any requests or bug reports to noresm-ncc@met.no.'

creation_date= '2019-12-24T19:49:22Z'

data_specs_version= '01.00.31'

experiment= 'update of RCP2.6 based on SSP1'

experiment_id= 'ssp126'

external_variables= 'areacella'

forcing_index= 1

frequency= 'mon'

further_info_url = 'https://furtherinfo.es-doc.org/CMIP6.NCC.NorESM2-MM.ssp126.none.r1i1p1f1'

grid = 'finite-volume grid with 0.9x1.25 degree lat/lon resolution'

grid_label= 'gn'

history = '2019-12-24T19:49:22Z ; CMOR rewrote data to be consistent with CMIP6, CF-1.7 CMIP-6.2 and CF standards.'

initialization_index = 1

institution = 'NorESM Climate modeling Consortium consisting of CICERO (Center for International Climate and Environmental Research, Oslo 0349), MET-Norway (Norwegian Meteorological Institute, Oslo 0313), NERSC (Nansen Environmental and Remote Sensing Center, Bergen 5006), NILU (Norwegian Institute for Air Research, Kjeller 2027), UiB (University of Bergen, Bergen 5007), UiO (University of Oslo, Oslo 0313) and UNI (Uni Research, Bergen 5008), Norway. Mailing address: NCC, c/o MET-Norway, Henrik Mohns plass 1, Oslo 0313, Norway'

institution_id= 'NCC'

mip_era = 'CMIP6'

model_id = 'NorESM2-MM'

nominal_resolution= '100 km'

parent_activity_id= 'CMIP'

parent_experiment_id = 'historical'

parent_mip_era= 'CMIP6'

parent_source_id = 'NorESM2-MM'

parent_sub_experiment_id = 'none'

parent_time_units= 'days since 1850-01-01'

parent_variant_label = 'r1i1p1f1'

physics_index= 1

product = 'model-output'

realization_index= 1

realm= 'land'

run_variant = 'N/A'

source= 'NorESM2-MM (2017):

aerosol: OsloAero

atmos: CAM-OSLO (1 degree resolution; 288 x 192; 32 levels; top level 3 mb)

atmosChem: OsloChemSimp

land: CLM

landIce: CISM

ocean: MICOM (1 degree resolution; 360 x 384; 70 levels; top grid cell minimum 0-2.5 m [native model uses hybrid density and generic upper-layer coordinate interpolated to z-level for contributed data])

ocnBgchem: HAMOCC

seaIce: CICE'

source_id= 'NorESM2-MM'

source_type = 'AOGCM AER BGC'

sub_experiment= 'none'

sub_experiment_id= 'none'

table_id = 'Emon'

table_info= 'Creation Date:(24 July 2019) MD5:0bb394a356ef9d214d027f1aca45853e'

title= 'NorESM2-MM output prepared for CMIP6'

variable_id = 'nMineralNH4'

variant_label= 'r1i1p1f1'

license = 'CMIP6 model data produced by NCC is licensed under a Creative Commons Attribution ShareAlike 4.0 International License (https://creativecommons.org/licenses). Consult https://pcmdi.llnl.gov/CMIP6/TermsOfUse for terms of use governing CMIP6 output, including citation requirements and proper acknowledgment. Further information about this data, including some limitations, can be found via the further_info_url (recorded as a global attribute in this file) and at https:///pcmdi.llnl.gov/. The data producers and data providers make no warranty, either express or implied, including, but not limited to, warranties of merchantability and fitness for a particular purpose. All liabilities arising from the supply of the information (including any liability arising in negligence) are excluded to the fullest extent permitted by law.'

cmor_version = '3.5.0'

tracking_id = 'hdl:21.14100/12142d42-3303-4e26-98c8-8848e92a2ebc'

Dimensions:

time = 71(UNLIMITED)

lat = 192

lon = 288

bnds = 2

Variables:

time

Size:71x1

Dimensions: time

Datatype:double

Attributes:

bounds= 'time_bnds'

units = 'days since 0001-01-01 00:00:00'

calendar = 'noleap'

axis = 'T'

long_name = 'time'

standard_name = 'time'

time_bnds

Size:2x71

Dimensions: bnds,time

Datatype:double

lat

Size:192x1

Dimensions: lat

Datatype:double

Attributes:

bounds= 'lat_bnds'

units = 'degrees_north'

axis = 'Y'

long_name = 'Latitude'

standard_name = 'latitude'

lat_bnds

Size:2x192

Dimensions: bnds,lat

Datatype:double

lon

Size:288x1

Dimensions: lon

Datatype:double

Attributes:

bounds= 'lon_bnds'

units = 'degrees_east'

axis = 'X'

long_name = 'Longitude'

standard_name = 'longitude'

lon_bnds

Size:2x288

Dimensions: bnds,lon

Datatype:double

nMineralNH4

Size:288x192x71

Dimensions: lon,lat,time

Datatype:single

Attributes:

standard_name = 'soil_mass_content_of_inorganic_ammonium_expressed_as_nitrogen'

long_name = 'Mineral Ammonium in the Soil'

comment= 'SUM of ammonium over all soil layers'

units = 'kg m-2'

original_name = 'SMIN_NH4'

cell_methods = 'area: mean where land time: mean'

cell_measures = 'area: areacella'

missing_value = 1.000000020040877e+20

_FillValue= 1.000000020040877e+20

history= '2019-12-24T19:49:22Z altered by CMOR: Converted type from 'd' to 'f'.

**C-2 mineral nitrogen in the soil**

Format: netcdf4_classic

Global Attributes:

Conventions= 'CF-1.7 CMIP-6.2'

activity_id= 'ScenarioMIP'

branch_method= 'Hybrid-restart from year 2015-01-01 of historical'

branch_time= 0

branch_time_in_child = 0

branch_time_in_parent= 60225

contact= 'Please send any requests or bug reports to noresm-ncc@met.no.'

creation_date= '2019-12-24T19:28:41Z'

data_specs_version = '01.00.31'

experiment = 'update of RCP2.6 based on SSP1'

experiment_id= 'ssp126'

external_variables = 'areacella'

forcing_index= 1

frequency= 'mon'

further_info_url = 'https://furtherinfo.es-doc.org/CMIP6.NCC.NorESM2-MM.ssp126.none.r1i1p1f1'

grid = 'finite-volume grid with 0.9x1.25 degree lat/lon resolution'

grid_label = 'gn'

history= '2019-12-24T19:28:41Z ; CMOR rewrote data to be consistent with CMIP6, CF-1.7 CMIP-6.2 and CF standards.'

initialization_index = 1

institution= 'NorESM Climate modeling Consortium consisting of CICERO (Center for International Climate and Environmental Research, Oslo 0349), MET-Norway (Norwegian Meteorological Institute, Oslo 0313), NERSC (Nansen Environmental and Remote Sensing Center, Bergen 5006), NILU (Norwegian Institute for Air Research, Kjeller 2027), UiB (University of Bergen, Bergen 5007), UiO (University of Oslo, Oslo 0313) and UNI (Uni Research, Bergen 5008), Norway. Mailing address: NCC, c/o MET-Norway, Henrik Mohns plass 1, Oslo 0313, Norway'

institution_id = 'NCC'

mip_era= 'CMIP6'

model_id = 'NorESM2-MM'

nominal_resolution = '100 km'

parent_activity_id = 'CMIP'

parent_experiment_id = 'historical'

parent_mip_era = 'CMIP6'

parent_source_id = 'NorESM2-MM'

parent_sub_experiment_id = 'none'

parent_time_units= 'days since 1850-01-01'

parent_variant_label = 'r1i1p1f1'

physics_index= 1

product= 'model-output'

realization_index= 1

realm= 'land'

run_variant= 'N/A'

source = 'NorESM2-MM (2017):

aerosol: OsloAero

atmos: CAM-OSLO (1 degree resolution; 288 x 192; 32 levels; top level 3 mb)

atmosChem: OsloChemSimp

land: CLM

landIce: CISM

ocean: MICOM (1 degree resolution; 360 x 384; 70 levels; top grid cell minimum 0-2.5 m [native model uses hybrid density and generic upper-layer coordinate interpolated to z-level for contributed data])

ocnBgchem: HAMOCC

seaIce: CICE'

source_id= 'NorESM2-MM'

source_type= 'AOGCM AER BGC'

sub_experiment = 'none'

sub_experiment_id= 'none'

table_id = 'Emon'

table_info = 'Creation Date:(24 July 2019) MD5:0bb394a356ef9d214d027f1aca45853e'

title= 'NorESM2-MM output prepared for CMIP6'

variable_id= 'nMineralNO3'

variant_label= 'r1i1p1f1'

license= 'CMIP6 model data produced by NCC is licensed under a Creative Commons Attribution ShareAlike 4.0 International License (https://creativecommons.org/licenses). Consult https://pcmdi.llnl.gov/CMIP6/TermsOfUse for terms of use governing CMIP6 output, including citation requirements and proper acknowledgment. Further information about this data, including some limitations, can be found via the further_info_url (recorded as a global attribute in this file) and at https:///pcmdi.llnl.gov/. The data producers and data providers make no warranty, either express or implied, including, but not limited to, warranties of merchantability and fitness for a particular purpose. All liabilities arising from the supply of the information (including any liability arising in negligence) are excluded to the fullest extent permitted by law.'

cmor_version = '3.5.0'

tracking_id= 'hdl:21.14100/60ccb52e-6fe4-42d8-b6f0-a9847041cc53'

Dimensions:

time = 71(UNLIMITED)

lat= 192

lon= 288

bnds = 2

Variables:

time

Size: 71x1

Dimensions: time

Datatype: double

Attributes:

bounds= 'time_bnds'

units = 'days since 0001-01-01 00:00:00'

calendar= 'noleap'

axis= 'T'

long_name = 'time'

standard_name = 'time'

time_bnds

Size: 2x71

Dimensions: bnds,time

Datatype: double

lat

Size: 192x1

Dimensions: lat

Datatype: double

Attributes:

bounds= 'lat_bnds'

units = 'degrees_north'

axis= 'Y'

long_name = 'Latitude'

standard_name = 'latitude'

lat_bnds

Size: 2x192

Dimensions: bnds,lat

Datatype: double

lon

Size: 288x1

Dimensions: lon

Datatype: double

Attributes:

bounds= 'lon_bnds'

units = 'degrees_east'

axis= 'X'

long_name = 'Longitude'

standard_name = 'longitude'

lon_bnds

Size: 2x288

Dimensions: bnds,lon

Datatype: double

nMineralNO3

Size: 288x192x71

Dimensions: lon,lat,time

Datatype: single

Attributes:

standard_name = 'soil_mass_content_of_inorganic_nitrate_expressed_as_nitrogen'

long_name = 'Mineral Nitrate in the Soil'

comment = 'SUM of nitrate over all soil layers'

units = 'kg m-2'

original_name = 'SMIN_NO3'

cell_methods= 'area: mean where land time: mean'

cell_measures = 'area: areacella'

missing_value = 1.000000020040877e+20

_FillValue= 1.000000020040877e+20

history = '2019-12-24T19:28:41Z altered by CMOR: Converted type from 'd' to 'f'.'

**C-3 nitrogen mass in soil pool**

Format:

netcdf4

Global Attributes:

Conventions = 'CF-1.7 CMIP-6.2'

activity_id = 'ScenarioMIP'

branch_method = 'standard'

branch_time_in_child= 735110

branch_time_in_parent = 735110

case_id = '1728'

cesm_casename = 'b.e21.BSSP126cmip6.f09_g17.CMIP6-SSP1-2.6.102'

contact = 'cesm_cmip6@ucar.edu'

creation_date = '2020-05-27T20:43:42Z'

data_specs_version= '01.00.31'

experiment= 'SSP-based RCP scenario with low radiative forcing by the end of the century.Following approximately RCP2.6 global forcing pathway with SSP1 socioeconomic conditions. Radiative forcing reaches a level of 2.6 W/m2 in 2100. Concentration-driven.'

experiment_id = 'ssp126'

external_variables= 'areacella'

forcing_index = 1

frequency = 'mon'

further_info_url= 'https://furtherinfo.es-doc.org/CMIP6.NCAR.CESM2.ssp126.none.r11i1p1f1'

grid= 'native 0.9x1.25 finite volume grid (192x288 latxlon)'

grid_label= 'gn'

initialization_index= 1

institution = 'National Center for Atmospheric Research, Climate and Global Dynamics Laboratory, 1850 Table Mesa Drive, Boulder, CO 80305, USA'

institution_id= 'NCAR'

license = 'CMIP6 model data produced by <The National Center for Atmospheric Research> is licensed under a Creative Commons Attribution-[]ShareAlike 4.0 International License (https://creativecommons.org/licenses/). Consult https://pcmdi.llnl.gov/CMIP6/TermsOfUse for terms of use governing CMIP6 output, including citation requirements and proper acknowledgment. Further information about this data, including some limitations, can be found via the further_info_url (recorded as a global attribute in this file)[]. The data producers and data providers make no warranty, either express or implied, including, but not limited to, warranties of merchantability and fitness for a particular purpose. All liabilities arising from the supply of the information (including any liability arising in negligence) are excluded to the fullest extent permitted by law.'

mip_era = 'CMIP6'

model_doi_url = 'https://doi.org/10.5065/D67H1H0V'

nominal_resolution= '100 km'

parent_activity_id= 'CMIP'

parent_experiment_id= 'historical'

parent_mip_era= 'CMIP6'

parent_source_id= 'CESM2'

parent_time_units = 'days since 0001-01-01 00:00:00'

parent_variant_label= 'r11i1p1f1'

physics_index = 1

product = 'model-output'

realization_index = 11

realm = 'land'

source= 'CESM2 (2017): atmosphere: CAM6 (0.9x1.25 finite volume grid; 288 x 192 longitude/latitude; 32 levels; top level 2.25 mb); ocean: POP2 (320x384 longitude/latitude; 60 levels; top grid cell 0-10 m); sea_ice: CICE5.1 (same grid as ocean); land: CLM5 0.9x1.25 finite volume grid; 288 x 192 longitude/latitude; 32 levels; top level 2.25 mb); aerosol: MAM4 (0.9x1.25 finite volume grid; 288 x 192 longitude/latitude; 32 levels; top level 2.25 mb); atmoschem: MAM4 (0.9x1.25 finite volume grid; 288 x 192 longitude/latitude; 32 levels; top level 2.25 mb); landIce: CISM2.1; ocnBgchem: MARBL (320x384 longitude/latitude; 60 levels; top grid cell 0-10 m)'

source_id = 'CESM2'

source_type = 'AOGCM BGC AER'

sub_experiment= 'none'

sub_experiment_id = 'none'

table_id= 'Emon'

tracking_id = 'hdl:21.14100/9c2cedf7-5c83-4d79-a073-bb7ca07d1bfd'

variable_id = 'nSoil'

variant_info= 'CMIP6 SSP1-2.6 experiments (2015-2100) with CAM6, interactive land (CLM5), coupled ocean (POP2) with biogeochemistry (MARBL), interactive sea ice (CICE5.1), and non-evolving land ice (CISM2.1).'

variant_label = 'r11i1p1f1'

Dimensions:

lat = 192

hist_interval = 2

lon = 288

time= 600 (UNLIMITED)

Variables:

nSoil

Size: 288x192x600

Dimensions: lon,lat,time

Datatype: single

Attributes:

_FillValue= 1.000000020040877e+20

cell_measures = 'area: areacella'

cell_methods= 'area: mean where land time: mean'

comment = 'chunits(TOTSOMN, units="g m-2")'

coordinates = 'time lat lon'

description = 'Report missing data over ocean grid cells. For fractional land report value averaged over the land fraction.'

frequency = 'mon'

id= 'nSoil'

long_name = 'Nitrogen Mass in Soil Pool'

mipTable= 'Emon'

missing_value = 1e+20

out_name= 'nSoil'

prov= 'PMIP [PMIP-Lmon-02]'

realm = 'land'

standard_name = 'soil_mass_content_of_nitrogen'

time= 'time'

time_label= 'time-mean'

time_title= 'Temporal mean'

title = 'Nitrogen Mass in Soil Pool'

type= 'real'

units = 'kg m-2'

variable_id = 'nSoil'

lat

Size: 192x1

Dimensions: lat

Datatype: double

Attributes:

axis= 'Y'

bounds= 'lat_bnds'

standard_name = 'latitude'

title = 'Latitude'

type= 'double'

units = 'degrees_north'

valid_max = 90

valid_min = -90

lon

Size: 288x1

Dimensions: lon

Datatype: double

Attributes:

axis= 'X'

bounds= 'lon_bnds'

standard_name = 'longitude'

title = 'Longitude'

type= 'double'

units = 'degrees_east'

valid_max = 360

valid_min = 0

time

Size: 600x1

Dimensions: time

Datatype: double

Attributes:

axis= 'T'

bounds= 'time_bnds'

standard_name = 'time'

title = 'time'

type= 'double'

units = 'days since 0001-01-01 00:00:00'

calendar= '365_day'

time_bnds

Size: 2x600

Dimensions: hist_interval,time

Datatype: double

Attributes:

calendar = 'noleap'

units= 'days since 0001-01-01 00:00:00'

lat_bnds

Size: 2x192

Dimensions: hist_interval,lat

Datatype: single

Attributes:

units = 'degrees_north'

lon_bnds

Size: 2x288

Dimensions: hist_interval,lon

Datatype: single

Attributes:

units = 'degrees_east'

**C-4 evaporation flux**

Format:

netcdf4_classic

Global Attributes:

CCCma_model_hash = 'Unknown'

CCCma_parent_runid = 'p2-his09'

CCCma_pycmor_hash = '7c87dd3a822d55650b3c17cd65db0ca251282530'

CCCma_runid = 'p2-s7009'

Conventions = 'CF-1.7 CMIP-6.2'

YMDH_branch_time_in_child = '2015:01:01:00'

YMDH_branch_time_in_parent = '2015:01:01:00'

activity_id = 'ScenarioMIP AerChemMIP'

branch_method = 'Spin-up documentation'

branch_time_in_child = 60225

branch_time_in_parent = 60225

contact = 'ec.cccma.info-info.ccmac.ec@canada.ca'

creation_date = '2019-05-29T20:59:36Z'

data_specs_version = '01.00.29'

experiment = 'gap-filling scenario reaching 7.0 based on SSP3'

experiment_id = 'ssp370'

external_variables = 'areacella'

forcing_index = 1

frequency = 'mon'

further_info_url = 'https://furtherinfo.es-doc.org/CMIP6.CCCma.CanESM5.ssp370.none.r9i1p2f1'

grid = 'T63L49 native atmosphere, T63 Linear Gaussian Grid; 128 x 64 longitude/latitude; 49 levels; top level 1 hPa'

grid_label = 'gn'

history = '2019-05-29T20:59:36Z ;rewrote data to be consistent with ScenarioMIP for variable prw found in table Amon.'

initialization_index = 1

institution = 'Canadian Centre for Climate Modelling and Analysis, Environment and Climate Change Canada, Victoria, BC V8P 5C2, Canada'

institution_id = 'CCCma'

mip_era = 'CMIP6'

nominal_resolution = '500 km'

parent_activity_id = 'CMIP'

parent_experiment_id = 'historical'

parent_mip_era = 'CMIP6'

parent_source_id = 'CanESM5'

parent_time_units = 'days since 1850-01-01 0:0:0.0'

parent_variant_label = 'r9i1p2f1'

physics_index = 2

product = 'model-output'

realization_index = 9

realm = 'atmos'

references = 'Geophysical Model Development Special issue on CanESM5 (https://www.geosci-model-dev.net/special_issues.html)'

source = 'CanESM5 (2019):

aerosol: interactive

atmos: CanAM5 (T63L49 native atmosphere, T63 Linear Gaussian Grid; 128 x 64 longitude/latitude; 49 levels; top level 1 hPa)

atmosChem: specified oxidants for aerosols

land: CLASS3.6/CTEM1.2

landIce: specified ice sheets

ocean: NEMO3.4.1 (ORCA1 tripolar grid, 1 deg with refinement to 1/3 deg within 20 degrees of the equator; 361 x 290 longitude/latitude; 45 vertical levels; top grid cell 0-6.19 m)

ocnBgchem: Canadian Model of Ocean Carbon (CMOC); NPZD ecosystem with OMIP prescribed carbonate chemistry

seaIce: LIM2'

source_id = 'CanESM5'

source_type = 'AOGCM'

sub_experiment = 'none'

sub_experiment_id = 'none'

table_id = 'Amon'

table_info = 'Creation Date:(20 February 2019) MD5:374fbe5a2bcca535c40f7f23da271e49'

title = 'CanESM5 output prepared for CMIP6'

tracking_id = 'hdl:21.14100/3811fa95-8422-49da-ba3b-f6e7a2114d0c'

variable_id = 'prw'

variant_label = 'r9i1p2f1'

version = 'v20190429'

license = 'CMIP6 model data produced by The Government of Canada (Canadian Centre for Climate Modelling and Analysis, Environment and Climate Change Canada) is licensed under a Creative Commons Attribution ShareAlike 4.0 International License (https://creativecommons.org/licenses). Consult https://pcmdi.llnl.gov/CMIP6/TermsOfUse for terms of use governing CMIP6 output, including citation requirements and proper acknowledgment. Further information about this data, including some limitations, can be found via the further_info_url (recorded as a global attribute in this file) and at https:///pcmdi.llnl.gov/. The data producers and data providers make no warranty, either express or implied, including, but not limited to, warranties of merchantability and fitness for a particular purpose. All liabilities arising from the supply of the information (including any liability arising in negligence) are excluded to the fullest extent permitted by law.'

cmor_version = '3.4.0'

Dimensions:

time = 1032 (UNLIMITED)

bnds = 2

lat = 64

lon = 128

Variables:

time

Size: 1032x1

Dimensions: time

Datatype: double

Attributes:

bounds = 'time_bnds'

units = 'days since 1850-01-01 0:0:0.0'

calendar = '365_day'

axis = 'T'

long_name = 'time'

standard_name = 'time'

time_bnds

Size: 2x1032

Dimensions: bnds,time

Datatype: double

lat

Size: 64x1

Dimensions: lat

Datatype: double

Attributes:

bounds = 'lat_bnds'

units = 'degrees_north'

axis = 'Y'

long_name = 'Latitude'

standard_name = 'latitude'

lat_bnds

Size: 2x64

Dimensions: bnds,lat

Datatype: double

lon

Size: 128x1

Dimensions: lon

Datatype: double

Attributes:

bounds = 'lon_bnds'

units = 'degrees_east'

axis = 'X'

long_name = 'Longitude'

standard_name = 'longitude'

lon_bnds

Size: 2x128

Dimensions: bnds,lon

Datatype: double

prw

Size: 128x64x1032

Dimensions: lon,lat,time

Datatype: single

Attributes:

standard_name = 'atmosphere_mass_content_of_water_vapor'

long_name = 'Water Vapor Path'

comment = 'vertically integrated through the atmospheric column'

units = 'kg m-2'

original_name = 'PWAT'

cell_methods = 'area: time: mean'

cell_measures = 'area: areacella'

history = '2019-05-29T20:59:36Z altered by CMOR: Reordered dimensions, original order: lat lon time. 2019-05-29T20:59:36Z altered by CMOR: replaced missing value flag (1e+38) with standard missing value (1e+20).'

missing_value = 1.000000020040877e+20

_FillValue = 1.000000020040877e+20

**C-5 sublimation and transpiration flux**

Format: netcdf4_classic

Global Attributes:

CCCma_model_hash = 'Unknown'

CCCma_parent_runid = 'rc3.1-his11'

CCCma_pycmor_hash = '26c970628162d607fffd14254956ebc6dd3b6f49'

CCCma_runid = 'rc3.1-s2611'

Conventions = 'CF-1.7 CMIP-6.2'

YMDH_branch_time_in_child = '2015:01:01:00'

YMDH_branch_time_in_parent = '2015:01:01:00'

activity_id = 'ScenarioMIP'

branch_method = 'Spin-up documentation'

branch_time_in_child = 60225

branch_time_in_parent = 60225

contact = 'ec.cccma.info-info.ccmac.ec@canada.ca'

creation_date = '2019-09-26T17:19:43Z'

data_specs_version = '01.00.30'

experiment = 'update of RCP2.6 based on SSP1'

experiment_id = 'ssp126'

external_variables = 'areacella'

forcing_index = 1

frequency = 'mon'

further_info_url = 'https://furtherinfo.es-doc.org/CMIP6.CCCma.CanESM5.ssp126.none.r11i1p1f1'

grid = 'T63L49 native atmosphere, T63 Linear Gaussian Grid; 128 x 64 longitude/latitude; 49 levels; top level 1 hPa'

grid_label = 'gn'

history = '2019-09-26T17:19:43Z ;rewrote data to be consistent with ScenarioMIP for variable evspsbl found in table Amon.'

initialization_index = 1

institution = 'Canadian Centre for Climate Modelling and Analysis, Environment and Climate Change Canada, Victoria, BC V8P 5C2, Canada'

institution_id = 'CCCma'

mip_era = 'CMIP6'

nominal_resolution = '500 km'

parent_activity_id = 'CMIP'

parent_experiment_id = 'historical'

parent_mip_era = 'CMIP6'

parent_source_id = 'CanESM5'

parent_time_units = 'days since 1850-01-01 0:0:0.0'

parent_variant_label = 'r11i1p1f1'

physics_index = 1

product = 'model-output'

realization_index = 11

realm = 'atmos'

references = 'Geophysical Model Development Special issue on CanESM5 (https://www.geosci-model-dev.net/special_issue989.html)'

source = 'CanESM5 (2019):

aerosol: interactive

atmos: CanAM5 (T63L49 native atmosphere, T63 Linear Gaussian Grid; 128 x 64 longitude/latitude; 49 levels; top level 1 hPa)

atmosChem: specified oxidants for aerosols

land: CLASS3.6/CTEM1.2

landIce: specified ice sheets

ocean: NEMO3.4.1 (ORCA1 tripolar grid, 1 deg with refinement to 1/3 deg within 20 degrees of the equator; 361 x 290 longitude/latitude; 45 vertical levels; top grid cell 0-6.19 m)

ocnBgchem: Canadian Model of Ocean Carbon (CMOC); NPZD ecosystem with OMIP prescribed carbonate chemistry

seaIce: LIM2'

source_id = 'CanESM5'

source_type = 'AOGCM'

sub_experiment = 'none'

sub_experiment_id = 'none'

table_id = 'Amon'

table_info = 'Creation Date:(09 May 2019) MD5:38ea1fbdf3f31659e83c719fb4c48428'

title = 'CanESM5 output prepared for CMIP6'

tracking_id = 'hdl:21.14100/e6ef729b-ed50-4f6d-8ef4-4ed902275098'

variable_id = 'evspsbl'

variant_label = 'r11i1p1f1'

version = 'v20190429'

license = 'CMIP6 model data produced by The Government of Canada (Canadian Centre for Climate Modelling and Analysis, Environment and Climate Change Canada) is licensed under a Creative Commons Attribution ShareAlike 4.0 International License (https://creativecommons.org/licenses). Consult https://pcmdi.llnl.gov/CMIP6/TermsOfUse for terms of use governing CMIP6 output, including citation requirements and proper acknowledgment. Further information about this data, including some limitations, can be found via the further_info_url (recorded as a global attribute in this file) and at https:///pcmdi.llnl.gov/. The data producers and data providers make no warranty, either express or implied, including, but not limited to, warranties of merchantability and fitness for a particular purpose. All liabilities arising from the supply of the information (including any liability arising in negligence) are excluded to the fullest extent permitted by law.'

cmor_version = '3.5.0'

Dimensions:

time = 1032 (UNLIMITED)

bnds = 2

lat = 64

lon = 128

Variables:

time

Size: 1032x1

Dimensions: time

Datatype: double

Attributes:

bounds = 'time_bnds'

units = 'days since 1850-01-01 0:0:0.0'

calendar = '365_day'

axis = 'T'

long_name = 'time'

standard_name = 'time'

time_bnds

Size: 2x1032

Dimensions: bnds,time

Datatype: double

lat

Size: 64x1

Dimensions: lat

Datatype: double

Attributes:

bounds = 'lat_bnds'

units = 'degrees_north'

axis = 'Y'

long_name = 'Latitude'

standard_name = 'latitude'

lat_bnds

Size: 2x64

Dimensions: bnds,lat

Datatype: double

lon

Size: 128x1

Dimensions: lon

Datatype: double

Attributes:

bounds = 'lon_bnds'

units = 'degrees_east'

axis = 'X'

long_name = 'Longitude'

standard_name = 'longitude'

lon_bnds

Size: 2x128

Dimensions: bnds,lon

Datatype: double

evspsbl

Size: 128x64x1032

Dimensions: lon,lat,time

Datatype: single

Attributes:

standard_name = 'water_evapotranspiration_flux'

long_name = 'Evaporation Including Sublimation and Transpiration'

comment = 'Evaporation at surface (also known as evapotranspiration): flux of water into the atmosphere due to conversion of both liquid and solid phases to vapor (from underlying surface and vegetation)'

units = 'kg m-2 s-1'

original_name = 'QFS'

cell_methods = 'area: time: mean'

cell_measures = 'area: areacella'

history = '2019-09-26T17:19:43Z altered by CMOR: Reordered dimensions, original order: lat lon time. 2019-09-26T17:19:43Z altered by CMOR: replaced missing value flag (1e+38) and corresponding data with standard missing value (1e+20).'

missing_value = 1.000000020040877e+20

_FillValue = 1.000000020040877e+20

**C-6 total nitrogen loss to leaching**

Format:

netcdf4_classic

Global Attributes:

Conventions = 'CF-1.7 CMIP-6.2'

activity_id = 'ScenarioMIP'

branch_method = 'standard'

branch_time_in_child = 60225

branch_time_in_parent = 60225

comment = 'none'

contact = 'T. Lovato'

creation_date = '2020-06-22T08:18:25Z'

data_specs_version = '01.00.31'

experiment = 'update of RCP2.6 based on SSP1'

experiment_id = 'ssp126'

external_variables = 'areacella'

forcing_index = 1

frequency = 'mon'

further_info_url = 'https://furtherinfo.es-doc.org/CMIP6.CMCC.CMCC-CM2-SR5.ssp126.none.r1i1p1f1'

grid = 'native land regular grid'

grid_label = 'gn'

history = '2020-06-22T08:18:25Z ;rewrote data to be consistent with ScenarioMIP for variable fNleach found in table Emon.;

none'

initialization_index = 1

institution = 'Fondazione Centro Euro-Mediterraneo sui Cambiamenti Climatici, Lecce 73100, Italy'

institution_id = 'CMCC'

mip_era = 'CMIP6'

nominal_resolution = '100 km'

parent_activity_id = 'CMIP'

parent_experiment_id = 'historical'

parent_mip_era = 'CMIP6'

parent_source_id = 'CMCC-CM2-SR5'

parent_time_units = 'days since 1850-01-01'

parent_variant_label = 'r1i1p1f1'

physics_index = 1

product = 'model-output'

realization_index = 1

realm = 'land'

references = 'none'

run_variant = '1st realization'

source = 'CMCC-CM2-SR5 (2016):

aerosol: MAM3

atmos: CAM5.3 (1deg; 288 x 192 longitude/latitude; 30 levels; top at ~2 hPa)

atmosChem: none

land: CLM4.5 (BGC mode)

landIce: none

ocean: NEMO3.6 (ORCA1 tripolar primarly 1 deg lat/lon with meridional refinement down to 1/3 degree in the tropics; 362 x 292 longitude/latitude; 50 vertical levels; top grid cell 0-1 m)

ocnBgchem: none

seaIce: CICE4.0'

source_id = 'CMCC-CM2-SR5'

source_type = 'AOGCM'

sub_experiment = 'none'

sub_experiment_id = 'none'

table_id = 'Emon'

table_info = 'Creation Date:(05 February 2020) MD5:6a248fd76c55aa6d6f7b3cc6866b5faf'

title = 'CMCC-CM2-SR5 output prepared for CMIP6'

variable_id = 'fNleach'

variant_label = 'r1i1p1f1'

license = 'CMIP6 model data produced by CMCC is licensed under a Creative Commons Attribution ShareAlike 4.0 International License (https://creativecommons.org/licenses). Consult https://pcmdi.llnl.gov/CMIP6/TermsOfUse for terms of use governing CMIP6 output, including citation requirements and proper acknowledgment. Further information about this data, including some limitations, can be found via the further_info_url (recorded as a global attribute in this file) and at https:///pcmdi.llnl.gov/. The data producers and data providers make no warranty, either express or implied, including, but not limited to, warranties of merchantability and fitness for a particular purpose. All liabilities arising from the supply of the information (including any liability arising in negligence) are excluded to the fullest extent permitted by law.'

cmor_version = '3.5.0'

tracking_id = 'hdl:21.14100/9914bbe3-58e2-40bb-9d35-232adf3412bb'

Dimensions:

time = 1032 (UNLIMITED)

lat = 192

lon = 288

bnds = 2

Variables:

time

Size: 1032x1

Dimensions: time

Datatype: double

Attributes:

bounds = 'time_bnds'

units = 'days since 1850-01-01'

calendar = '365_day'

axis = 'T'

long_name = 'time'

standard_name = 'time'

time_bnds

Size: 2x1032

Dimensions: bnds,time

Datatype: double

lat

Size: 192x1

Dimensions: lat

Datatype: double

Attributes:

bounds = 'lat_bnds'

units = 'degrees_north'

axis = 'Y'

long_name = 'Latitude'

standard_name = 'latitude'

lat_bnds

Size: 2x192

Dimensions: bnds,lat

Datatype: double

lon

Size: 288x1

Dimensions: lon

Datatype: double

Attributes:

bounds = 'lon_bnds'

units = 'degrees_east'

axis = 'X'

long_name = 'Longitude'

standard_name = 'longitude'

lon_bnds

Size: 2x288

Dimensions: bnds,lon

Datatype: double

fNleach

Size: 288x192x1032

Dimensions: lon,lat,time

Datatype: single

Attributes:

standard_name = 'mass_flux_of_carbon_out_of_soil_due_to_leaching_and_runoff'

long_name = 'Total Nitrogen Loss to Leaching or Runoff (Sum of Ammonium, Nitrite and Nitrate)'

comment = 'In accordance with common usage in geophysical disciplines, 'flux' implies per unit area, called 'flux density' in physics. The specification of a physical process by the phrase 'due_to_' process means that the quantity named is a single term in a sum of terms which together compose the general quantity named by omitting the phrase. 'Leaching' means the loss of water soluble chemical species from soil. Runoff is the liquid water which drains from land. If not specified, 'runoff' refers to the sum of surface runoff and subsurface drainage.'

units = 'kg m-2 s-1'

original_name = 'SMIN_NO3_LEACHED,SOM_N_LEACHED'

cell_methods = 'area: mean where land time: mean'

cell_measures = 'area: areacella'

missing_value = 1.000000020040877e+20

_FillValue = 1.000000020040877e+20

**C-7 total nitrogen loss to runoff**

Format:

netcdf4_classic

Global Attributes:

Conventions = 'CF-1.7 CMIP-6.2'

activity_id = 'ScenarioMIP'

branch_method = 'standard'

branch_time_in_child = 60265

branch_time_in_parent = 60265

creation_date = '2020-12-07T04:37:56Z'

data_specs_version = '01.00.28'

experiment = 'update of RCP2.6 based on SSP1'

experiment_id = 'ssp126'

external_variables = 'areacella'

forcing_index = 2

frequency = 'mon'

further_info_url = 'https://furtherinfo.es-doc.org/CMIP6.MIROC.MIROC-ES2L.ssp126.none.r10i1p1f2'

grid = 'native atmosphere T42 Gaussian grid'

grid_label = 'gn'

history = '2020-12-07T04:37:56Z ; CMOR rewrote data to be consistent with CMIP6, CF-1.7 CMIP-6.2 and CF standards.'

initialization_index = 1

institution = 'JAMSTEC (Japan Agency for Marine-Earth Science and Technology, Kanagawa 236-0001, Japan), AORI (Atmosphere and Ocean Research Institute, The University of Tokyo, Chiba 277-8564, Japan), NIES (National Institute for Environmental Studies, Ibaraki 305-8506, Japan), and R-CCS (RIKEN Center for Computational Science, Hyogo 650-0047, Japan)'

institution_id = 'MIROC'

mip_era = 'CMIP6'

nominal_resolution = '500 km'

parent_activity_id = 'CMIP'

parent_experiment_id = 'historical'

parent_mip_era = 'CMIP6'

parent_source_id = 'MIROC-ES2L'

parent_time_units = 'days since 1850-1-1'

parent_variant_label = 'r1i1p1f2'

physics_index = 1

product = 'model-output'

realization_index = 10

realm = 'land'

source = 'MIROC-ES2L (2018):

aerosol: SPRINTARS6.0

atmos: CCSR AGCM (T42; 128 x 64 longitude/latitude; 40 levels; top level 3 hPa)

atmosChem: none

land: MATSIRO6.0+VISIT-e ver.1.0

landIce: none

ocean: COCO4.9 (tripolar primarily 1deg; 360 x 256 longitude/latitude; 63 levels; top grid cell 0-2 m)

ocnBgchem: OECO ver.2.0; NPZD-type with C/N/P/Fe/O cycles

seaIce: COCO4.9'

source_id = 'MIROC-ES2L'

source_type = 'AOGCM AER BGC'

sub_experiment = 'none'

sub_experiment_id = 'none'

table_id = 'Emon'

table_info = 'Creation Date:(06 November 2018) MD5:d0a12333b2450fdd2d9d815a3ed90e4f'

title = 'MIROC-ES2L output prepared for CMIP6'

variable_id = 'fNleach'

variant_label = 'r10i1p1f2'

license = 'CMIP6 model data produced by MIROC is licensed under a Creative Commons Attribution ShareAlike 4.0 International License (https://creativecommons.org/licenses/). Consult https://pcmdi.llnl.gov/CMIP6/TermsOfUse for terms of use governing CMIP6 output, including citation requirements and proper acknowledgment. Further information about this data, including some limitations, can be found via the further_info_url (recorded as a global attribute in this file). The data producers and data providers make no warranty, either express or implied, including, but not limited to, warranties of merchantability and fitness for a particular purpose. All liabilities arising from the supply of the information (including any liability arising in negligence) are excluded to the fullest extent permitted by law.'

cmor_version = '3.3.2'

tracking_id = 'hdl:21.14100/0ba5e2bc-8a2e-4fd2-a2a9-f7a99ab4bee5'

Dimensions:

time = 1032 (UNLIMITED)

lat = 64

lon = 128

bnds = 2

Variables:

time

Size: 1032x1

Dimensions: time

Datatype: double

Attributes:

bounds = 'time_bnds'

units = 'days since 1850-1-1'

calendar = 'gregorian'

axis = 'T'

long_name = 'time'

standard_name = 'time'

time_bnds

Size: 2x1032

Dimensions: bnds,time

Datatype: double

lat

Size: 64x1

Dimensions: lat

Datatype: double

Attributes:

bounds = 'lat_bnds'

units = 'degrees_north'

axis = 'Y'

long_name = 'Latitude'

standard_name = 'latitude'

lat_bnds

Size: 2x64

Dimensions: bnds,lat

Datatype: double

lon

Size: 128x1

Dimensions: lon

Datatype: double

Attributes:

bounds = 'lon_bnds'

units = 'degrees_east'

axis = 'X'

long_name = 'Longitude'

standard_name = 'longitude'

lon_bnds

Size: 2x128

Dimensions: bnds,lon

Datatype: double

fNleach

Size: 128x64x1032

Dimensions: lon,lat,time

Datatype: single

Attributes:

standard_name = 'mass_flux_of_carbon_out_of_soil_due_to_leaching_and_runoff'

long_name = 'Total N loss to leaching or runoff (sum of ammonium, nitrite and nitrate)'

comment = 'In accordance with common usage in geophysical disciplines, 'flux' implies per unit area, called 'flux density' in physics. The specification of a physical process by the phrase 'due_to_' process means that the quantity named is a single term in a sum of terms which together compose the general quantity named by omitting the phrase. 'Leaching' means the loss of water soluble chemical species from soil. Runoff is the liquid water which drains from land. If not specified, 'runoff' refers to the sum of surface runoff and subsurface drainage.'

units = 'kg m-2 s-1'

original_name = 'LNLEACHS'

cell_methods = 'area: mean where land time: mean'

cell_measures = 'area: areacella'

history = '2020-12-07T04:37:56Z altered by CMOR: replaced missing value flag (-999) with standard missing value (1e+20). 2020-12-07T04:37:56Z altered by CMOR: Inverted axis: lat.'

missing_value = 1.000000020040877e+20

_FillValue = 1.000000020040877e+20

**D-1 flux into atmosphere due to autotrophic respiration**

Format:

netcdf4_classic

Global Attributes:

CCCma_model_hash = 'Unknown'

CCCma_parent_runid = 'rc3.1-his11'

CCCma_pycmor_hash = '26c970628162d607fffd14254956ebc6dd3b6f49'

CCCma_runid = 'rc3.1-s2611'

Conventions = 'CF-1.7 CMIP-6.2'

YMDH_branch_time_in_child = '2015:01:01:00'

YMDH_branch_time_in_parent = '2015:01:01:00'

activity_id = 'ScenarioMIP'

branch_method = 'Spin-up documentation'

branch_time_in_child = 60225

branch_time_in_parent = 60225

contact = 'ec.cccma.info-info.ccmac.ec@canada.ca'

creation_date = '2019-09-26T17:09:08Z'

data_specs_version = '01.00.30'

experiment = 'update of RCP2.6 based on SSP1'

experiment_id = 'ssp126'

external_variables = 'areacella'

forcing_index = 1

frequency = 'mon'

further_info_url = 'https://furtherinfo.es-doc.org/CMIP6.CCCma.CanESM5.ssp126.none.r11i1p1f1'

grid = 'T63L49 native atmosphere, T63 Linear Gaussian Grid; 128 x 64 longitude/latitude; 49 levels; top level 1 hPa'

grid_label = 'gn'

history = '2019-09-26T17:09:08Z ;rewrote data to be consistent with ScenarioMIP for variable rGrowth found in table Lmon.'

initialization_index = 1

institution = 'Canadian Centre for Climate Modelling and Analysis, Environment and Climate Change Canada, Victoria, BC V8P 5C2, Canada'

institution_id = 'CCCma'

mip_era = 'CMIP6'

nominal_resolution = '500 km'

parent_activity_id = 'CMIP'

parent_experiment_id = 'historical'

parent_mip_era = 'CMIP6'

parent_source_id = 'CanESM5'

parent_time_units = 'days since 1850-01-01 0:0:0.0'

parent_variant_label = 'r11i1p1f1'

physics_index = 1

product = 'model-output'

realization_index = 11

realm = 'land'

references = 'Geophysical Model Development Special issue on CanESM5 (https://www.geosci-model-dev.net/special_issue989.html)'

source = 'CanESM5 (2019):

aerosol: interactive

atmos: CanAM5 (T63L49 native atmosphere, T63 Linear Gaussian Grid; 128 x 64 longitude/latitude; 49 levels; top level 1 hPa)

atmosChem: specified oxidants for aerosols

land: CLASS3.6/CTEM1.2

landIce: specified ice sheets

ocean: NEMO3.4.1 (ORCA1 tripolar grid, 1 deg with refinement to 1/3 deg within 20 degrees of the equator; 361 x 290 longitude/latitude; 45 vertical levels; top grid cell 0-6.19 m)

ocnBgchem: Canadian Model of Ocean Carbon (CMOC); NPZD ecosystem with OMIP prescribed carbonate chemistry

seaIce: LIM2'

source_id = 'CanESM5'

source_type = 'AOGCM'

sub_experiment = 'none'

sub_experiment_id = 'none'

table_id = 'Lmon'

table_info = 'Creation Date:(09 May 2019) MD5:38ea1fbdf3f31659e83c719fb4c48428'

title = 'CanESM5 output prepared for CMIP6'

tracking_id = 'hdl:21.14100/a1cc959d-3ea6-42ab-9526-b35045dc793e'

variable_id = 'rGrowth'

variant_label = 'r11i1p1f1'

version = 'v20190429'

license = 'CMIP6 model data produced by The Government of Canada (Canadian Centre for Climate Modelling and Analysis, Environment and Climate Change Canada) is licensed under a Creative Commons Attribution ShareAlike 4.0 International License (https://creativecommons.org/licenses). Consult https://pcmdi.llnl.gov/CMIP6/TermsOfUse for terms of use governing CMIP6 output, including citation requirements and proper acknowledgment. Further information about this data, including some limitations, can be found via the further_info_url (recorded as a global attribute in this file) and at https:///pcmdi.llnl.gov/. The data producers and data providers make no warranty, either express or implied, including, but not limited to, warranties of merchantability and fitness for a particular purpose. All liabilities arising from the supply of the information (including any liability arising in negligence) are excluded to the fullest extent permitted by law.'

cmor_version = '3.5.0'

Dimensions:

time = 1032 (UNLIMITED)

bnds = 2

lat = 64

lon = 128

Variables:

time

Size: 1032x1

Dimensions: time

Datatype: double

Attributes:

bounds = 'time_bnds'

units = 'days since 1850-01-01 0:0:0.0'

calendar = '365_day'

axis = 'T'

long_name = 'time'

standard_name = 'time'

time_bnds

Size: 2x1032

Dimensions: bnds,time

Datatype: double

lat

Size: 64x1

Dimensions: lat

Datatype: double

Attributes:

bounds = 'lat_bnds'

units = 'degrees_north'

axis = 'Y'

long_name = 'Latitude'

standard_name = 'latitude'

lat_bnds

Size: 2x64

Dimensions: bnds,lat

Datatype: double

lon

Size: 128x1

Dimensions: lon

Datatype: double

Attributes:

bounds = 'lon_bnds'

units = 'degrees_east'

axis = 'X'

long_name = 'Longitude'

standard_name = 'longitude'

lon_bnds

Size: 2x128

Dimensions: bnds,lon

Datatype: double

rGrowth

Size: 128x64x1032

Dimensions: lon,lat,time

Datatype: single

Attributes:

standard_name = 'surface_upward_mass_flux_of_carbon_dioxide_expressed_as_carbon_due_to_plant_respiration_for_biomass_growth'

long_name = 'Carbon Mass Flux into Atmosphere Due to Growth Autotrophic Respiration on Land'

comment = 'CFRG*12.011E-9, ScenarioMIP_table_comment: Growth respiration is defined as the additional carbon cost for the synthesis of new growth.'

units = 'kg m-2 s-1'

original_name = 'CFRG'

history = 'mltby12em9 2019-09-26T17:09:08Z altered by CMOR: Reordered dimensions, original order: lat lon time. 2019-09-26T17:09:08Z altered by CMOR: replaced missing value flag (1e+38) and corresponding data with standard missing value (1e+20).'

cell_methods = 'area: mean where land time: mean'

cell_measures = 'area: areacella'

missing_value = 1.000000020040877e+20

_FillValue = 1.000000020040877e+20

**D-2 flux into atmosphere due to heterotrophic respiration**

Format:

netcdf4_classic

Global Attributes:

CCCma_model_hash = 'Unknown'

CCCma_parent_runid = 'rc3.1-his11'

CCCma_pycmor_hash = '26c970628162d607fffd14254956ebc6dd3b6f49'

CCCma_runid = 'rc3.1-s2611'

Conventions = 'CF-1.7 CMIP-6.2'

YMDH_branch_time_in_child = '2015:01:01:00'

YMDH_branch_time_in_parent = '2015:01:01:00'

activity_id = 'ScenarioMIP'

branch_method = 'Spin-up documentation'

branch_time_in_child = 60225

branch_time_in_parent = 60225

contact= 'ec.cccma.info-info.ccmac.ec@canada.ca'

creation_date = '2019-09-26T17:09:10Z'

data_specs_version = '01.00.30'

experiment= 'update of RCP2.6 based on SSP1'

experiment_id = 'ssp126'

external_variables = 'areacella'

forcing_index = 1

frequency= 'mon'

further_info_url = 'https://furtherinfo.es-doc.org/CMIP6.CCCma.CanESM5.ssp126.none.r11i1p1f1'

grid= 'T63L49 native atmosphere, T63 Linear Gaussian Grid; 128 x 64 longitude/latitude; 49 levels; top level 1 hPa'

grid_label= 'gn'

history= '2019-09-26T17:09:10Z ;rewrote data to be consistent with ScenarioMIP for variable rh found in table Lmon.'

initialization_index = 1

institution = 'Canadian Centre for Climate Modelling and Analysis, Environment and Climate Change Canada, Victoria, BC V8P 5C2, Canada'

institution_id = 'CCCma'

mip_era= 'CMIP6'

nominal_resolution = '500 km'

parent_activity_id = 'CMIP'

parent_experiment_id = 'historical'

parent_mip_era = 'CMIP6'

parent_source_id = 'CanESM5'

parent_time_units = 'days since 1850-01-01 0:0:0.0'

parent_variant_label = 'r11i1p1f1'

physics_index = 1

product= 'model-output'

realization_index = 11

realm= 'land'

references= 'Geophysical Model Development Special issue on CanESM5 (https://www.geosci-model-dev.net/special_issue989.html)'

source= 'CanESM5 (2019):

aerosol: interactive

atmos: CanAM5 (T63L49 native atmosphere, T63 Linear Gaussian Grid; 128 x 64 longitude/latitude; 49 levels; top level 1 hPa)

atmosChem: specified oxidants for aerosols

land: CLASS3.6/CTEM1.2

landIce: specified ice sheets

ocean: NEMO3.4.1 (ORCA1 tripolar grid, 1 deg with refinement to 1/3 deg within 20 degrees of the equator; 361 x 290 longitude/latitude; 45 vertical levels; top grid cell 0-6.19 m)

ocnBgchem: Canadian Model of Ocean Carbon (CMOC); NPZD ecosystem with OMIP prescribed carbonate chemistry

seaIce: LIM2'

source_id= 'CanESM5'

source_type = 'AOGCM'

sub_experiment = 'none'

sub_experiment_id = 'none'

table_id= 'Lmon'

table_info= 'Creation Date:(09 May 2019) MD5:38ea1fbdf3f31659e83c719fb4c48428'

title= 'CanESM5 output prepared for CMIP6'

tracking_id = 'hdl:21.14100/9af247f1-7432-46f0-b0ec-2db5369f9141'

variable_id = 'rh'

variant_label = 'r11i1p1f1'

version= 'v20190429'

license= 'CMIP6 model data produced by The Government of Canada (Canadian Centre for Climate Modelling and Analysis, Environment and Climate Change Canada) is licensed under a Creative Commons Attribution ShareAlike 4.0 International License (https://creativecommons.org/licenses). Consult https://pcmdi.llnl.gov/CMIP6/TermsOfUse for terms of use governing CMIP6 output, including citation requirements and proper acknowledgment. Further information about this data, including some limitations, can be found via the further_info_url (recorded as a global attribute in this file) and at https:///pcmdi.llnl.gov/. The data producers and data providers make no warranty, either express or implied, including, but not limited to, warranties of merchantability and fitness for a particular purpose. All liabilities arising from the supply of the information (including any liability arising in negligence) are excluded to the fullest extent permitted by law.'

cmor_version = '3.5.0'

Dimensions:

time = 1032 (UNLIMITED)

bnds = 2

lat = 64

lon = 128

Variables:

time

Size: 1032x1

Dimensions: time

Datatype: double

Attributes:

bounds = 'time_bnds'

units = 'days since 1850-01-01 0:0:0.0'

calendar = '365_day'

axis = 'T'

long_name = 'time'

standard_name = 'time'

time_bnds

Size: 2x1032

Dimensions: bnds,time

Datatype: double

lat

Size: 64x1

Dimensions: lat

Datatype: double

Attributes:

bounds = 'lat_bnds'

units = 'degrees_north'

axis = 'Y'

long_name = 'Latitude'

standard_name = 'latitude'

lat_bnds

Size: 2x64

Dimensions: bnds,lat

Datatype: double

lon

Size: 128x1

Dimensions: lon

Datatype: double

Attributes:

bounds = 'lon_bnds'

units = 'degrees_east'

axis = 'X'

long_name = 'Longitude'

standard_name = 'longitude'

lon_bnds

Size: 2x128

Dimensions: bnds,lon

Datatype: double

rh

Size: 128x64x1032

Dimensions: lon,lat,time

Datatype: single

Attributes:

standard_name = 'surface_upward_mass_flux_of_carbon_dioxide_expressed_as_carbon_due_to_heterotrophic_respiration'

long_name = 'Carbon Mass Flux into Atmosphere Due to Heterotrophic Respiration on Land'

comment = '(CFRH+CFRD)*12.011E-9, ScenarioMIP_table_comment: Carbon mass flux per unit area into atmosphere due to heterotrophic respiration on land (respiration by consumers)'

units = 'kg m-2 s-1'

original_name = 'ADD'

history = 'addmltby12em9 2019-09-26T17:09:10Z altered by CMOR: Reordered dimensions, original order: lat lon time. 2019-09-26T17:09:10Z altered by CMOR: replaced missing value flag (1e+38) and corresponding data with standard missing value (1e+20).'

cell_methods = 'area: mean where land time: mean'

cell_measures = 'area: areacella'

missing_value = 1.000000020040877e+20

_FillValue = 1.000000020040877e+20

**D-3 primary mole productivity**

Format: netcdf4

Global Attributes:

Conventions = 'CF-1.7 CMIP-6.2'

activity_id = 'ScenarioMIP'

branch_method = 'standard'

branch_time_in_child= 735110

branch_time_in_parent = 735110

case_id = '1728'

cesm_casename = 'b.e21.BSSP126cmip6.f09_g17.CMIP6-SSP1-2.6.102'

contact = 'cesm_cmip6@ucar.edu'

creation_date = '2020-05-27T16:13:38Z'

data_specs_version= '01.00.31'

experiment= 'SSP-based RCP scenario with low radiative forcing by the end of the century.Following approximately RCP2.6 global forcing pathway with SSP1 socioeconomic conditions. Radiative forcing reaches a level of 2.6 W/m2 in 2100. Concentration-driven.'

experiment_id = 'ssp126'

external_variables= 'areacella'

forcing_index = 1

frequency = 'mon'

further_info_url= 'https://furtherinfo.es-doc.org/CMIP6.NCAR.CESM2.ssp126.none.r11i1p1f1'

grid= 'native 0.9x1.25 finite volume grid (192x288 latxlon)'

grid_label= 'gn'

initialization_index= 1

institution = 'National Center for Atmospheric Research, Climate and Global Dynamics Laboratory, 1850 Table Mesa Drive, Boulder, CO 80305, USA'

institution_id= 'NCAR'

license = 'CMIP6 model data produced by <The National Center for Atmospheric Research> is licensed under a Creative Commons Attribution-[]ShareAlike 4.0 International License (https://creativecommons.org/licenses/). Consult https://pcmdi.llnl.gov/CMIP6/TermsOfUse for terms of use governing CMIP6 output, including citation requirements and proper acknowledgment. Further information about this data, including some limitations, can be found via the further_info_url (recorded as a global attribute in this file)[]. The data producers and data providers make no warranty, either express or implied, including, but not limited to, warranties of merchantability and fitness for a particular purpose. All liabilities arising from the supply of the information (including any liability arising in negligence) are excluded to the fullest extent permitted by law.'

mip_era = 'CMIP6'

model_doi_url = 'https://doi.org/10.5065/D67H1H0V'

nominal_resolution= '100 km'

parent_activity_id= 'CMIP'

parent_experiment_id= 'historical'

parent_mip_era= 'CMIP6'

parent_source_id= 'CESM2'

parent_time_units = 'days since 0001-01-01 00:00:00'

parent_variant_label= 'r11i1p1f1'

physics_index = 1

product = 'model-output'

realization_index = 11

realm = 'land'

source= 'CESM2 (2017): atmosphere: CAM6 (0.9x1.25 finite volume grid; 288 x 192 longitude/latitude; 32 levels; top level 2.25 mb); ocean: POP2 (320x384 longitude/latitude; 60 levels; top grid cell 0-10 m); sea_ice: CICE5.1 (same grid as ocean); land: CLM5 0.9x1.25 finite volume grid; 288 x 192 longitude/latitude; 32 levels; top level 2.25 mb); aerosol: MAM4 (0.9x1.25 finite volume grid; 288 x 192 longitude/latitude; 32 levels; top level 2.25 mb); atmoschem: MAM4 (0.9x1.25 finite volume grid; 288 x 192 longitude/latitude; 32 levels; top level 2.25 mb); landIce: CISM2.1; ocnBgchem: MARBL (320x384 longitude/latitude; 60 levels; top grid cell 0-10 m)'

source_id = 'CESM2'

source_type = 'AOGCM BGC AER'

sub_experiment= 'none'

sub_experiment_id = 'none'

table_id= 'Emon'

tracking_id = 'hdl:21.14100/c87344aa-cb00-4c65-80ac-95d37aab3394'

variable_id = 'fNnetmin'

variant_info= 'CMIP6 SSP1-2.6 experiments (2015-2100) with CAM6, interactive land (CLM5), coupled ocean (POP2) with biogeochemistry (MARBL), interactive sea ice (CICE5.1), and non-evolving land ice (CISM2.1).'

variant_label = 'r11i1p1f1'

Dimensions:

lat = 192

hist_interval = 2

lon = 288

time= 600 (UNLIMITED)

Variables:

fNnetmin

Size: 288x192x600

Dimensions: lon,lat,time

Datatype: single

Attributes:

_FillValue= 1.000000020040877e+20

cell_measures = 'area: areacella'

cell_methods= 'area: mean where land time: mean'

comment = 'chunits(ACTUAL_IMMOB, units="g m-2 s-1")+chunits(NET_NMIN, units="g m-2 s-1")'

coordinates = 'time lat lon'

description = 'Loss of soil nitrogen through remineralization and immobilisation. Remineralization is the degradation of organic matter into inorganic forms of carbon, nitrogen, phosphorus and other micronutrients, which consumes oxygen and releases energy. Immobilisation of nitrogen refers to retention of nitrogen by micro-organisms under certain conditions, making it unavailable for plants.'

frequency = 'mon'

id= 'fNnetmin'

long_name = 'Net Nitrogen Release from Soil and Litter as the Outcome of Nitrogen Immobilisation and Gross Mineralisation'

mipTable= 'Emon'

missing_value = 1e+20

out_name= 'fNnetmin'

prov= 'C4MIP [C_LandT1]'

realm = 'land'

standard_name = 'mass_flux_of_nitrogen_compounds_expressed_as_nitrogen_out_of_litter_and_soil_due_to_immobilisation_and_remineralization'

time= 'time'

time_label= 'time-mean'

time_title= 'Temporal mean'

title = 'Net Nitrogen Release from Soil and Litter as the Outcome of Nitrogen Immobilisation and Gross Mineralisation'

type= 'real'

units = 'kg m-2 s-1'

variable_id = 'fNnetmin'

lat

Size: 192x1

Dimensions: lat

Datatype: double

Attributes:

axis= 'Y'

bounds= 'lat_bnds'

standard_name = 'latitude'

title = 'Latitude'

type= 'double'

units = 'degrees_north'

valid_max = 90

valid_min = -90

lon

Size: 288x1

Dimensions: lon

Datatype: double

Attributes:

axis= 'X'

bounds= 'lon_bnds'

standard_name = 'longitude'

title = 'Longitude'

type= 'double'

units = 'degrees_east'

valid_max = 360

valid_min = 0

time

Size: 600x1

Dimensions: time

Datatype: double

Attributes:

axis= 'T'

bounds= 'time_bnds'

standard_name = 'time'

title = 'time'

type= 'double'

units = 'days since 0001-01-01 00:00:00'

calendar= '365_day'

time_bnds

Size: 2x600

Dimensions: hist_interval,time

Datatype: double

Attributes:

calendar = 'noleap'

units= 'days since 0001-01-01 00:00:00'

lat_bnds

Size: 2x192

Dimensions: hist_interval,lat

Datatype: single

Attributes:

units = 'degrees_north'

lon_bnds

Size: 2x288

Dimensions: hist_interval,lon

Datatype: single

Attributes:

units = 'degrees_east'

**D-4 nitrogen immobilisation and gross mineralization**

Format: netcdf4

Global Attributes:

Conventions = 'CF-1.7 CMIP-6.2'

branch_method = 'standard'

branch_time_in_child= 735110

branch_time_in_parent = 735110

case_id = '969'

cesm_casename = 'b.e21.BWSSP370cmip6.f09_g17.CMIP6-SSP3-7.0-WACCM.001'

contact = 'cesm_cmip6@ucar.edu'

creation_date = '2019-03-30T21:07:03Z'

data_specs_version= '01.00.29'

experiment= 'Gap: Baseline scenario with a medium to high radiative forcing by the end of century. Following approximately RCP7.0 global forcing pathway with SSP3 socioeconomic conditions. Radiative forcing reaches a level of 7.0 W/m2 in 2100.Concentration-driven.'

experiment_id = 'ssp370'

external_variables= 'areacella'

forcing_index = 1

frequency = 'mon'

further_info_url= 'https://furtherinfo.es-doc.org/CMIP6.NCAR.CESM2-WACCM.ssp370.none.r1i1p1f1'

grid= 'native 0.9x1.25 finite volume grid (192x288 latxlon)'

grid_label= 'gn'

initialization_index= 1

institution = 'National Center for Atmospheric Research, Climate and Global Dynamics Laboratory, 1850 Table Mesa Drive, Boulder, CO 80305, USA'

institution_id= 'NCAR'

license = 'CMIP6 model data produced by <The National Center for Atmospheric Research> is licensed under a Creative Commons Attribution-[]ShareAlike 4.0 International License (https://creativecommons.org/licenses/). Consult https://pcmdi.llnl.gov/CMIP6/TermsOfUse for terms of use governing CMIP6 output, including citation requirements and proper acknowledgment. Further information about this data, including some limitations, can be found via the further_info_url (recorded as a global attribute in this file)[]. The data producers and data providers make no warranty, either express or implied, including, but not limited to, warranties of merchantability and fitness for a particular purpose. All liabilities arising from the supply of the information (including any liability arising in negligence) are excluded to the fullest extent permitted by law.'

mip_era = 'CMIP6'

model_doi_url = 'https://doi.org/10.5065/D67H1H0V'

nominal_resolution= '100 km'

parent_activity_id= 'CMIP'

parent_experiment_id= 'historical'

parent_mip_era= 'CMIP6'

parent_source_id= 'CESM2-WACCM'

parent_time_units = 'days since 0001-01-01 00:00:00'

parent_variant_label= 'r1i1p1f1'

physics_index = 1

product = 'model-output'

realization_index = 1

realm = 'land'

source= 'CESM2 (2017): atmosphere: CAM6 (0.9x1.25 finite volume grid; 288 x 192 longitude/latitude; 70 levels; top level 4.5e-6 mb); ocean: POP2 (320x384 longitude/latitude; 60 levels; top grid cell 0-10 m); sea_ice: CICE5.1 (same grid as ocean); land: CLM5 0.9x1.25 finite volume grid; 288 x 192 longitude/latitude; 70 levels; top level 4.5e-6 mb); aerosol: MAM4 (0.9x1.25 finite volume grid; 288 x 192 longitude/latitude; 70 levels; top level 4.5e-6 mb); atmosChem: WACCM (0.9x1.25 finite volume grid; 288 x 192 longitude/latitude; 70 levels; top level 4.5e-6 mb; landIce: CISM2.1; ocnBgchem: MARBL (320x384 longitude/latitude; 60 levels; top grid cell 0-10 m)'

source_id = 'CESM2-WACCM'

source_type = 'AOGCM BGC CHEM AER'

sub_experiment= 'none'

sub_experiment_id = 'none'

table_id= 'Emon'

tracking_id = 'hdl:21.14100/86cc5845-2985-4f90-9d75-decb87d00bed'

variable_id = 'fNnetmin'

variant_info= 'CMIP6 CESM2 future scenario SSP3-7.0, years 2015-2100, with WACCM6 with interactive chemistry (TSMLT1), interactive land (CLM5), coupled ocean (POP2) with biogeochemistry (MARBL), interactive sea ice (CICE5.1), and non-evolving land ice (CISM2.1).'

variant_label = 'r1i1p1f1'

activity_id = 'ScenarioMIP'

Dimensions:

lat = 192

hist_interval = 2

lon = 288

time= 600 (UNLIMITED)

Variables:

fNnetmin

Size: 288x192x600

Dimensions: lon,lat,time

Datatype: single

Attributes:

_FillValue= 1.000000020040877e+20

cell_measures = 'area: areacella'

cell_methods= 'area: mean where land time: mean'

comment = 'chunits(ACTUAL_IMMOB, units="g m-2 s-1")+chunits(NET_NMIN, units="g m-2 s-1")'

coordinates = 'time lat lon'

deflate = '0'

deflate_level = '0'

description = 'Loss of soil nitrogen through remineralization and immobilisation. Remineralization is the degradation of organic matter into inorganic forms of carbon, nitrogen, phosphorus and other micronutrients, which consumes oxygen and releases energy. Immobilisation of nitrogen refers to retention of nitrogen by micro-organisms under certain conditions, making it unavailable for plants.'

frequency = 'mon'

id= 'fNnetmin'

long_name = 'Net Nitrogen Release from Soil and Litter as the Outcome of Nitrogen Immobilisation and Gross Mineralisation'

mipTable= 'Emon'

missing_value = 1e+20

out_name= 'fNnetmin'

prov= 'C4MIP [C_LandT1]'

realm = 'land'

shuffle = '0'

standard_name = 'mass_flux_of_nitrogen_compounds_expressed_as_nitrogen_out_of_litter_and_soil_due_to_immobilisation_and_remineralization'

time= 'time'

time_label= 'time-mean'

time_title= 'Temporal mean'

title = 'Net Nitrogen Release from Soil and Litter as the Outcome of Nitrogen Immobilisation and Gross Mineralisation'

type= 'real'

units = 'kg m-2 s-1'

variable_id = 'fNnetmin'

lat

Size: 192x1

Dimensions: lat

Datatype: double

Attributes:

axis= 'Y'

bounds= 'lat_bnds'

standard_name = 'latitude'

title = 'Latitude'

type= 'double'

units = 'degrees_north'

valid_max = 90

valid_min = -90

lon

Size: 288x1

Dimensions: lon

Datatype: double

Attributes:

axis= 'X'

bounds= 'lon_bnds'

standard_name = 'longitude'

title = 'Longitude'

type= 'double'

units = 'degrees_east'

valid_max = 360

valid_min = 0

time

Size: 600x1

Dimensions: time

Datatype: double

Attributes:

axis= 'T'

bounds= 'time_bnds'

standard_name = 'time'

title = 'time'

type= 'double'

units = 'days since 0001-01-01 00:00:00'

calendar= 'noleap'

time_bnds

Size: 2x600

Dimensions: hist_interval,time

Datatype: double

Attributes:

calendar = 'noleap'

units= 'days since 0001-01-01 00:00:00'

lat_bnds

Size: 2x192

Dimensions: hist_interval,lat

Datatype: single

Attributes:

units = 'degrees_north'

lon_bnds

Size: 2x288

Dimensions: hist_interval,lon

Datatype: single

Attributes:

units = 'degrees_east'

**D-5 total plant nitrogen uptake**

Format:

netcdf4_classic

Global Attributes:

Conventions = 'CF-1.7 CMIP-6.2'

activity_id = 'ScenarioMIP'

branch_method = 'standard'

branch_time_in_child= 60265

branch_time_in_parent = 60265

contact = 'cmip6-mpi-esm@dkrz.de'

creation_date = '2019-10-29T16:24:02Z'

data_specs_version= '01.00.30'

experiment= 'update of RCP2.6 based on SSP1'

experiment_id = 'ssp126'

external_variables= 'areacella'

forcing_index = 1

frequency = 'mon'

further_info_url= 'https://furtherinfo.es-doc.org/CMIP6.MPI-M.MPI-ESM1-2-LR.ssp126.none.r1i1p1f1'

grid= 'gn'

grid_label= 'gn'

history = '2019-10-29T16:24:02Z ; CMOR rewrote data to be consistent with CMIP6, CF-1.7 CMIP-6.2 and CF standards.'

initialization_index= 1

institution = 'Max Planck Institute for Meteorology, Hamburg 20146, Germany'

institution_id= 'MPI-M'

mip_era = 'CMIP6'

nominal_resolution= '250 km'

parent_activity_id= 'CMIP'

parent_experiment_id= 'historical'

parent_mip_era= 'CMIP6'

parent_source_id= 'MPI-ESM1-2-LR'

parent_time_units = 'days since 1850-1-1 00:00:00'

parent_variant_label= 'r1i1p1f1'

physics_index = 1

product = 'model-output'

project_id= 'CMIP6'

realization_index = 1

realm = 'land'

references= 'MPI-ESM: Mauritsen, T. et al. (2019), Developments in the MPI‐M Earth System Model version 1.2 (MPI‐ESM1.2) and Its Response to Increasing CO2, J. Adv. Model. Earth Syst.,11, 998-1038, doi:10.1029/2018MS001400,

Mueller, W.A. et al. (2018): A high‐resolution version of the Max Planck Institute Earth System Model MPI‐ESM1.2‐HR. J. Adv. Model. EarthSyst.,10,1383–1413, doi:10.1029/2017MS001217'

source= 'MPI-ESM1.2-LR (2017):

aerosol: none, prescribed MACv2-SP

atmos: ECHAM6.3 (spectral T63; 192 x 96 longitude/latitude; 47 levels; top level 0.01 hPa)

atmosChem: none

land: JSBACH3.20

landIce: none/prescribed

ocean: MPIOM1.63 (bipolar GR1.5, approximately 1.5deg; 256 x 220 longitude/latitude; 40 levels; top grid cell 0-12 m)

ocnBgchem: HAMOCC6

seaIce: unnamed (thermodynamic (Semtner zero-layer) dynamic (Hibler 79) sea ice model)'

source_id = 'MPI-ESM1-2-LR'

source_type = 'AOGCM'

sub_experiment= 'none'

sub_experiment_id = 'none'

table_id= 'Emon'

table_info= 'Creation Date:(09 May 2019) MD5:e6ef8ececc8f338646ebfb3aeed36bfc'

title = 'MPI-ESM1-2-LR output prepared for CMIP6'

variable_id = 'fNup'

variant_label = 'r1i1p1f1'

license = 'CMIP6 model data produced by MPI-M is licensed under a Creative Commons Attribution ShareAlike 4.0 International License (https://creativecommons.org/licenses). Consult https://pcmdi.llnl.gov/CMIP6/TermsOfUse for terms of use governing CMIP6 output, including citation requirements and proper acknowledgment. Further information about this data, including some limitations, can be found via the further_info_url (recorded as a global attribute in this file) and. The data producers and data providers make no warranty, either express or implied, including, but not limited to, warranties of merchantability and fitness for a particular purpose. All liabilities arising from the supply of the information (including any liability arising in negligence) are excluded to the fullest extent permitted by law.'

cmor_version= '3.5.0'

tracking_id = 'hdl:21.14100/fa1de949-0743-4530-bfc2-7d09cf05d75e'

Dimensions:

time = 240 (UNLIMITED)

lat= 96

lon= 192

bnds = 2

Variables:

time

Size: 240x1

Dimensions: time

Datatype: double

Attributes:

bounds= 'time_bnds'

units = 'days since 1850-1-1 00:00:00'

calendar= 'proleptic_gregorian'

axis= 'T'

long_name = 'time'

standard_name = 'time'

time_bnds

Size: 2x240

Dimensions: bnds,time

Datatype: double

lat

Size: 96x1

Dimensions: lat

Datatype: double

Attributes:

bounds= 'lat_bnds'

units = 'degrees_north'

axis= 'Y'

long_name = 'Latitude'

standard_name = 'latitude'

lat_bnds

Size: 2x96

Dimensions: bnds,lat

Datatype: double

lon

Size: 192x1

Dimensions: lon

Datatype: double

Attributes:

bounds= 'lon_bnds'

units = 'degrees_east'

axis= 'X'

long_name = 'Longitude'

standard_name = 'longitude'

lon_bnds

Size: 2x192

Dimensions: bnds,lon

Datatype: double

fNup

Size: 192x96x240

Dimensions: lon,lat,time

Datatype: single

Attributes:

standard_name = 'tendency_of_vegetation_mass_content_of_nitrogen_compounds_expressed_as_nitrogen_due_to_fixation'

long_name = 'Total Plant Nitrogen Uptake (Sum of Ammonium and Nitrate) Irrespective of the Source of Nitrogen'

comment = 'The uptake of nitrogen by fixation: nitrogen fixation means the uptake of nitrogen gas directly from the atmosphere.'

units = 'kg m-2 s-1'

original_name = 'fNup'

cell_methods= 'area: mean where land time: mean'

cell_measures = 'area: areacella'

history = '2019-10-29T16:24:02Z altered by CMOR: replaced missing value flag (-9e+33) and corresponding data with standard missing value (1e+20). 2019-10-29T16:24:02Z altered by CMOR: Inverted axis: lat.'

missing_value = 1.000000020040877e+20

_FillValue= 1.000000020040877e+20

**D-6 biological nitrogen fixation**

Format:

netcdf4_classic

Global Attributes:

Conventions = 'CF-1.7 CMIP-6.2'

activity_id = 'ScenarioMIP'

branch_method = 'standard'

branch_time_in_child= 60265

branch_time_in_parent = 60265

contact = 'cmip6-mpi-esm@dkrz.de'

creation_date = '2019-10-29T16:24:02Z'

data_specs_version= '01.00.30'

experiment= 'update of RCP2.6 based on SSP1'

experiment_id = 'ssp126'

external_variables= 'areacella'

forcing_index = 1

frequency = 'mon'

further_info_url= 'https://furtherinfo.es-doc.org/CMIP6.MPI-M.MPI-ESM1-2-LR.ssp126.none.r1i1p1f1'

grid= 'gn'

grid_label= 'gn'

history = '2019-10-29T16:24:02Z ; CMOR rewrote data to be consistent with CMIP6, CF-1.7 CMIP-6.2 and CF standards.'

initialization_index= 1

institution = 'Max Planck Institute for Meteorology, Hamburg 20146, Germany'

institution_id= 'MPI-M'

mip_era = 'CMIP6'

nominal_resolution= '250 km'

parent_activity_id= 'CMIP'

parent_experiment_id= 'historical'

parent_mip_era= 'CMIP6'

parent_source_id= 'MPI-ESM1-2-LR'

parent_time_units = 'days since 1850-1-1 00:00:00'

parent_variant_label= 'r1i1p1f1'

physics_index = 1

product = 'model-output'

project_id= 'CMIP6'

realization_index = 1

realm = 'land'

references= 'MPI-ESM: Mauritsen, T. et al. (2019), Developments in the MPI‐M Earth System Model version 1.2 (MPI‐ESM1.2) and Its Response to Increasing CO2, J. Adv. Model. Earth Syst.,11, 998-1038, doi:10.1029/2018MS001400,

Mueller, W.A. et al. (2018): A high‐resolution version of the Max Planck Institute Earth System Model MPI‐ESM1.2‐HR. J. Adv. Model. EarthSyst.,10,1383–1413, doi:10.1029/2017MS001217'

source= 'MPI-ESM1.2-LR (2017):

aerosol: none, prescribed MACv2-SP

atmos: ECHAM6.3 (spectral T63; 192 x 96 longitude/latitude; 47 levels; top level 0.01 hPa)

atmosChem: none

land: JSBACH3.20

landIce: none/prescribed

ocean: MPIOM1.63 (bipolar GR1.5, approximately 1.5deg; 256 x 220 longitude/latitude; 40 levels; top grid cell 0-12 m)

ocnBgchem: HAMOCC6

seaIce: unnamed (thermodynamic (Semtner zero-layer) dynamic (Hibler 79) sea ice model)'

source_id = 'MPI-ESM1-2-LR'

source_type = 'AOGCM'

sub_experiment= 'none'

sub_experiment_id = 'none'

table_id= 'Emon'

table_info= 'Creation Date:(09 May 2019) MD5:e6ef8ececc8f338646ebfb3aeed36bfc'

title = 'MPI-ESM1-2-LR output prepared for CMIP6'

variable_id = 'fNup'

variant_label = 'r1i1p1f1'

license = 'CMIP6 model data produced by MPI-M is licensed under a Creative Commons Attribution ShareAlike 4.0 International License (https://creativecommons.org/licenses). Consult https://pcmdi.llnl.gov/CMIP6/TermsOfUse for terms of use governing CMIP6 output, including citation requirements and proper acknowledgment. Further information about this data, including some limitations, can be found via the further_info_url (recorded as a global attribute in this file) and. The data producers and data providers make no warranty, either express or implied, including, but not limited to, warranties of merchantability and fitness for a particular purpose. All liabilities arising from the supply of the information (including any liability arising in negligence) are excluded to the fullest extent permitted by law.'

cmor_version= '3.5.0'

tracking_id = 'hdl:21.14100/fa1de949-0743-4530-bfc2-7d09cf05d75e'

Dimensions:

time = 240 (UNLIMITED)

lat= 96

lon= 192

bnds = 2

Variables:

time

Size: 240x1

Dimensions: time

Datatype: double

Attributes:

bounds= 'time_bnds'

units = 'days since 1850-1-1 00:00:00'

calendar= 'proleptic_gregorian'

axis= 'T'

long_name = 'time'

standard_name = 'time'

time_bnds

Size: 2x240

Dimensions: bnds,time

Datatype: double

lat

Size: 96x1

Dimensions: lat

Datatype: double

Attributes:

bounds= 'lat_bnds'

units = 'degrees_north'

axis= 'Y'

long_name = 'Latitude'

standard_name = 'latitude'

lat_bnds

Size: 2x96

Dimensions: bnds,lat

Datatype: double

lon

Size: 192x1

Dimensions: lon

Datatype: double

Attributes:

bounds= 'lon_bnds'

units = 'degrees_east'

axis= 'X'

long_name = 'Longitude'

standard_name = 'longitude'

lon_bnds

Size: 2x192

Dimensions: bnds,lon

Datatype: double

fNup

Size: 192x96x240

Dimensions: lon,lat,time

Datatype: single

Attributes:

standard_name = 'tendency_of_vegetation_mass_content_of_nitrogen_compounds_expressed_as_nitrogen_due_to_fixation'

long_name = 'Total Plant Nitrogen Uptake (Sum of Ammonium and Nitrate) Irrespective of the Source of Nitrogen'

comment = 'The uptake of nitrogen by fixation: nitrogen fixation means the uptake of nitrogen gas directly from the atmosphere.'

units = 'kg m-2 s-1'

original_name = 'fNup'

cell_methods= 'area: mean where land time: mean'

cell_measures = 'area: areacella'

history = '2019-10-29T16:24:02Z altered by CMOR: replaced missing value flag (-9e+33) and corresponding data with standard missing value (1e+20). 2019-10-29T16:24:02Z altered by CMOR: Inverted axis: lat.'

missing_value = 1.000000020040877e+20

_FillValue= 1.000000020040877e+20

**E-1 heterotrophic respiration from litter on land**

Format: netcdf4

Global Attributes:

Conventions = 'CF-1.7 CMIP-6.2'

activity_id = 'ScenarioMIP'

branch_method = 'standard'

branch_time_in_child= 735110

branch_time_in_parent = 735110

case_id = '1729'

cesm_casename = 'b.e21.BSSP126cmip6.f09_g17.CMIP6-SSP1-2.6.103'

contact = 'cesm_cmip6@ucar.edu'

creation_date = '2020-05-26T19:39:38Z'

data_specs_version= '01.00.31'

experiment= 'SSP-based RCP scenario with low radiative forcing by the end of the century.Following approximately RCP2.6 global forcing pathway with SSP1 socioeconomic conditions. Radiative forcing reaches a level of 2.6 W/m2 in 2100. Concentration-driven.'

experiment_id = 'ssp126'

external_variables= 'areacella'

forcing_index = 1

frequency = 'mon'

further_info_url= 'https://furtherinfo.es-doc.org/CMIP6.NCAR.CESM2.ssp126.none.r4i1p1f1'

grid= 'native 0.9x1.25 finite volume grid (192x288 latxlon)'

grid_label= 'gn'

initialization_index= 1

institution = 'National Center for Atmospheric Research, Climate and Global Dynamics Laboratory, 1850 Table Mesa Drive, Boulder, CO 80305, USA'

institution_id= 'NCAR'

license = 'CMIP6 model data produced by <The National Center for Atmospheric Research> is licensed under a Creative Commons Attribution-[]ShareAlike 4.0 International License (https://creativecommons.org/licenses/). Consult https://pcmdi.llnl.gov/CMIP6/TermsOfUse for terms of use governing CMIP6 output, including citation requirements and proper acknowledgment. Further information about this data, including some limitations, can be found via the further_info_url (recorded as a global attribute in this file)[]. The data producers and data providers make no warranty, either express or implied, including, but not limited to, warranties of merchantability and fitness for a particular purpose. All liabilities arising from the supply of the information (including any liability arising in negligence) are excluded to the fullest extent permitted by law.'

mip_era = 'CMIP6'

model_doi_url = 'https://doi.org/10.5065/D67H1H0V'

nominal_resolution= '100 km'

parent_activity_id= 'CMIP'

parent_experiment_id= 'historical'

parent_mip_era= 'CMIP6'

parent_source_id= 'CESM2'

parent_time_units = 'days since 0001-01-01 00:00:00'

parent_variant_label= 'r4i1p1f1'

physics_index = 1

product = 'model-output'

realization_index = 4

realm = 'land'

source= 'CESM2 (2017): atmosphere: CAM6 (0.9x1.25 finite volume grid; 288 x 192 longitude/latitude; 32 levels; top level 2.25 mb); ocean: POP2 (320x384 longitude/latitude; 60 levels; top grid cell 0-10 m); sea_ice: CICE5.1 (same grid as ocean); land: CLM5 0.9x1.25 finite volume grid; 288 x 192 longitude/latitude; 32 levels; top level 2.25 mb); aerosol: MAM4 (0.9x1.25 finite volume grid; 288 x 192 longitude/latitude; 32 levels; top level 2.25 mb); atmoschem: MAM4 (0.9x1.25 finite volume grid; 288 x 192 longitude/latitude; 32 levels; top level 2.25 mb); landIce: CISM2.1; ocnBgchem: MARBL (320x384 longitude/latitude; 60 levels; top grid cell 0-10 m)'

source_id = 'CESM2'

source_type = 'AOGCM BGC AER'

sub_experiment= 'none'

sub_experiment_id = 'none'

table_id= 'Lmon'

tracking_id = 'hdl:21.14100/ac6a0edb-e427-4cf8-9c82-e083569fc602'

variable_id = 'ra'

variant_info= 'CMIP6 SSP1-2.6 experiments (2015-2100) with CAM6, interactive land (CLM5), coupled ocean (POP2) with biogeochemistry (MARBL), interactive sea ice (CICE5.1), and non-evolving land ice (CISM2.1).'

variant_label = 'r4i1p1f1'

Dimensions:

lat = 192

hist_interval = 2

lon = 288

time= 600 (UNLIMITED)

Variables:

ra

Size: 288x192x600

Dimensions: lon,lat,time

Datatype: single

Attributes:

_FillValue= 1.000000020040877e+20

cell_measures = 'area: areacella'

cell_methods= 'area: mean where land time: mean'

comment = 'chunits(AR, units="g m-2 s-1")'

coordinates = 'time lat lon'

description = 'Carbon mass flux per unit area into atmosphere due to autotrophic respiration on land (respiration by producers) [see rh for heterotrophic production]'

frequency = 'mon'

id= 'ra'

long_name = 'Carbon Mass Flux into Atmosphere Due to Autotrophic (Plant) Respiration on Land [kgC m-2 s-1]'

mipTable= 'Lmon'

missing_value = 1e+20

out_name= 'ra'

positive= 'up'

prov= 'Lmon ((isd.003))'

realm = 'land'

standard_name = 'surface_upward_mass_flux_of_carbon_dioxide_expressed_as_carbon_due_to_plant_respiration'

time= 'time'

time_label= 'time-mean'

time_title= 'Temporal mean'

title = 'Carbon Mass Flux into Atmosphere Due to Autotrophic (Plant) Respiration on Land [kgC m-2 s-1]'

type= 'real'

units = 'kg m-2 s-1'

variable_id = 'ra'

lat

Size: 192x1

Dimensions: lat

Datatype: double

Attributes:

axis= 'Y'

bounds= 'lat_bnds'

standard_name = 'latitude'

title = 'Latitude'

type= 'double'

units = 'degrees_north'

valid_max = 90

valid_min = -90

lon

Size: 288x1

Dimensions: lon

Datatype: double

Attributes:

axis= 'X'

bounds= 'lon_bnds'

standard_name = 'longitude'

title = 'Longitude'

type= 'double'

units = 'degrees_east'

valid_max = 360

valid_min = 0

time

Size: 600x1

Dimensions: time

Datatype: double

Attributes:

axis= 'T'

bounds= 'time_bnds'

standard_name = 'time'

title = 'time'

type= 'double'

units = 'days since 0001-01-01 00:00:00'

calendar= '365_day'

time_bnds

Size: 2x600

Dimensions: hist_interval,time

Datatype: double

Attributes:

calendar = 'noleap'

units= 'days since 0001-01-01 00:00:00'

lat_bnds

Size: 2x192

Dimensions: hist_interval,lat

Datatype: single

Attributes:

units = 'degrees_north'

lon_bnds

Size: 2x288

Dimensions: hist_interval,lon

Datatype: single

Attributes:

units = 'degrees_east'

**E-2 nitrogen mass in litter pool**

Format: netcdf4_classic

Global Attributes:

Conventions = 'CF-1.7 CMIP-6.2'

activity_id = 'ScenarioMIP'

branch_method = 'standard'

branch_time_in_child= 60265

branch_time_in_parent = 60265

creation_date = '2021-05-25T03:20:37Z'

data_specs_version= '01.00.30'

experiment= 'update of RCP2.6 based on SSP1'

experiment_id = 'ssp126'

external_variables= 'areacella'

forcing_index = 1

frequency = 'mon'

further_info_url= 'https://furtherinfo.es-doc.org/CMIP6.CSIRO.ACCESS-ESM1-5.ssp126.none.r11i1p1f1'

grid= 'native atmosphere N96 grid (145x192 latxlon)'

grid_label= 'gn'

history = '2021-05-25T03:20:37Z ; CMOR rewrote data to be consistent with CMIP6, CF-1.7 CMIP-6.2 and CF standards.'

initialization_index= 1

institution = 'Commonwealth Scientific and Industrial Research Organisation, Aspendale, Victoria 3195, Australia'

institution_id= 'CSIRO'

mip_era = 'CMIP6'

nominal_resolution= '250 km'

notes = 'Exp: ESM-ssp126; Local ID: SSP-126-15; Variable: nLitter (['fld_s03i864', 'fld_s03i865', 'fld_s03i866', 'fld_s03i317'])'

parent_activity_id= 'CMIP'

parent_experiment_id= 'historical'

parent_mip_era= 'CMIP6'

parent_source_id= 'ACCESS-ESM1-5'

parent_time_units = 'days since 1850-1-1'

parent_variant_label= 'r11i1p1f1'

physics_index = 1

product = 'model-output'

realization_index = 11

realm = 'land'

run_variant = 'forcing: GHG, Oz, SA, Sl, Vl, BC, OC, (GHG = CO2, N2O, CH4, CFC11, CFC12, CFC113, HCFC22, HFC125, HFC134a)'

source= 'ACCESS-ESM1.5 (2019):

aerosol: CLASSIC (v1.0)

atmos: HadGAM2 (r1.1, N96; 192 x 145 longitude/latitude; 38 levels; top level 39255 m)

atmosChem: none

land: CABLE2.4

landIce: none

ocean: ACCESS-OM2 (MOM5, tripolar primarily 1deg; 360 x 300 longitude/latitude; 50 levels; top grid cell 0-10 m)

ocnBgchem: WOMBAT (same grid as ocean)

seaIce: CICE4.1 (same grid as ocean)'

source_id = 'ACCESS-ESM1-5'

source_type = 'AOGCM'

sub_experiment= 'none'

sub_experiment_id = 'none'

table_id= 'Emon'

table_info= 'Creation Date:(30 April 2019) MD5:12ec21eb48eb992c2e353382c1c903b1'

title = 'ACCESS-ESM1-5 output prepared for CMIP6'

variable_id = 'nLitter'

variant_label = 'r11i1p1f1'

version = 'v20210525'

license = 'CMIP6 model data produced by CSIRO is licensed under a Creative Commons Attribution-ShareAlike 4.0 International License (https://creativecommons.org/licenses/). Consult https://pcmdi.llnl.gov/CMIP6/TermsOfUse for terms of use governing CMIP6 output, including citation requirements and proper acknowledgment.Further information about this data, including some limitations, can be found via the further_info_url (recorded as a global attribute in this file). The data producers and data providers make no warranty, either express or implied, including, but not limited to, warranties of merchantability and fitness for a particular purpose. All liabilities arising from the supply of the information (including any liability arising in negligence) are excluded to the fullest extent permitted by law.'

cmor_version= '3.4.0'

tracking_id = 'hdl:21.14100/789fcb61-9913-418b-9bc9-e0139d8beee2'

Dimensions:

time = 1032(UNLIMITED)

lat= 145

lon= 192

bnds = 2

Variables:

time

Size: 1032x1

Dimensions: time

Datatype: double

Attributes:

bounds= 'time_bnds'

units = 'days since 1850-01-01'

calendar= 'proleptic_gregorian'

axis= 'T'

long_name = 'time'

standard_name = 'time'

time_bnds

Size: 2x1032

Dimensions: bnds,time

Datatype: double

lat

Size: 145x1

Dimensions: lat

Datatype: double

Attributes:

bounds= 'lat_bnds'

units = 'degrees_north'

axis= 'Y'

long_name = 'Latitude'

standard_name = 'latitude'

lat_bnds

Size: 2x145

Dimensions: bnds,lat

Datatype: double

lon

Size: 192x1

Dimensions: lon

Datatype: double

Attributes:

bounds= 'lon_bnds'

units = 'degrees_east'

axis= 'X'

long_name = 'Longitude'

standard_name = 'longitude'

lon_bnds

Size: 2x192

Dimensions: bnds,lon

Datatype: double

nLitter

Size: 192x145x1032

Dimensions: lon,lat,time

Datatype: single

Attributes:

standard_name= 'litter_mass_content_of_nitrogen'

long_name= 'Nitrogen Mass in Litter Pool'

comment= 'Report missing data over ocean grid cells. For fractional land report value averaged over the land fraction.'

units= 'kg m-2'

original_units = 'g m-2'

history= '2021-05-25T03:20:36Z altered by CMOR: Converted units from 'g m-2' to 'kg m-2'.'

cell_methods = 'area: mean where land time: mean'

cell_measures= 'area: areacella'

missing_value= 1.000000020040877e+20

_FillValue = 1.000000020040877e+20

**E-3 litter pools on land-use tiles**

Format: netcdf4

Global Attributes:

Conventions = 'CF-1.7 CMIP-6.2'

activity_id = 'ScenarioMIP'

branch_method = 'standard'

branch_time_in_child= 735110

branch_time_in_parent = 735110

case_id = '1728'

cesm_casename = 'b.e21.BSSP126cmip6.f09_g17.CMIP6-SSP1-2.6.102'

contact = 'cesm_cmip6@ucar.edu'

creation_date = '2020-05-27T18:34:27Z'

data_specs_version= '01.00.31'

experiment= 'SSP-based RCP scenario with low radiative forcing by the end of the century.Following approximately RCP2.6 global forcing pathway with SSP1 socioeconomic conditions. Radiative forcing reaches a level of 2.6 W/m2 in 2100. Concentration-driven.'

experiment_id = 'ssp126'

external_variables= 'areacella'

forcing_index = 1

frequency = 'mon'

further_info_url= 'https://furtherinfo.es-doc.org/CMIP6.NCAR.CESM2.ssp126.none.r11i1p1f1'

grid= 'native 0.9x1.25 finite volume grid (192x288 latxlon)'

grid_label= 'gn'

initialization_index= 1

institution = 'National Center for Atmospheric Research, Climate and Global Dynamics Laboratory, 1850 Table Mesa Drive, Boulder, CO 80305, USA'

institution_id= 'NCAR'

license = 'CMIP6 model data produced by <The National Center for Atmospheric Research> is licensed under a Creative Commons Attribution-[]ShareAlike 4.0 International License (https://creativecommons.org/licenses/). Consult https://pcmdi.llnl.gov/CMIP6/TermsOfUse for terms of use governing CMIP6 output, including citation requirements and proper acknowledgment. Further information about this data, including some limitations, can be found via the further_info_url (recorded as a global attribute in this file)[]. The data producers and data providers make no warranty, either express or implied, including, but not limited to, warranties of merchantability and fitness for a particular purpose. All liabilities arising from the supply of the information (including any liability arising in negligence) are excluded to the fullest extent permitted by law.'

mip_era = 'CMIP6'

model_doi_url = 'https://doi.org/10.5065/D67H1H0V'

nominal_resolution= '100 km'

parent_activity_id= 'CMIP'

parent_experiment_id= 'historical'

parent_mip_era= 'CMIP6'

parent_source_id= 'CESM2'

parent_time_units = 'days since 0001-01-01 00:00:00'

parent_variant_label= 'r11i1p1f1'

physics_index = 1

product = 'model-output'

realization_index = 11

realm = 'land'

source= 'CESM2 (2017): atmosphere: CAM6 (0.9x1.25 finite volume grid; 288 x 192 longitude/latitude; 32 levels; top level 2.25 mb); ocean: POP2 (320x384 longitude/latitude; 60 levels; top grid cell 0-10 m); sea_ice: CICE5.1 (same grid as ocean); land: CLM5 0.9x1.25 finite volume grid; 288 x 192 longitude/latitude; 32 levels; top level 2.25 mb); aerosol: MAM4 (0.9x1.25 finite volume grid; 288 x 192 longitude/latitude; 32 levels; top level 2.25 mb); atmoschem: MAM4 (0.9x1.25 finite volume grid; 288 x 192 longitude/latitude; 32 levels; top level 2.25 mb); landIce: CISM2.1; ocnBgchem: MARBL (320x384 longitude/latitude; 60 levels; top grid cell 0-10 m)'

source_id = 'CESM2'

source_type = 'AOGCM BGC AER'

sub_experiment= 'none'

sub_experiment_id = 'none'

table_id= 'Emon'

tracking_id = 'hdl:21.14100/0947f77c-ba7f-4b78-a963-61edf8a9b076'

variable_id = 'raLut'

variant_info= 'CMIP6 SSP1-2.6 experiments (2015-2100) with CAM6, interactive land (CLM5), coupled ocean (POP2) with biogeochemistry (MARBL), interactive sea ice (CICE5.1), and non-evolving land ice (CISM2.1).'

variant_label = 'r11i1p1f1'

Dimensions:

lat = 192

hist_interval = 2

landuse = 4

lon = 288

time= 600 (UNLIMITED)

Variables:

raLut

Size: 288x192x4x600

Dimensions: lon,lat,landuse,time

Datatype: single

Attributes:

_FillValue= 1.000000020040877e+20

cell_measures = 'area: areacella'

cell_methods= 'area: time: mean where sector'

comment = 'chunits(CLM_landunit_to_CMIP6_Lut(AR,"all",time,lat,lon,grid1d_ixy,grid1d_jxy,grid1d_lon,grid1d_lat,land1d_lon,land1d_lat,land1d_ityplunit,land1d_active,land1d_wtgcell,landUse), units="g m-2 s-1")'

coordinates = 'time landuse lat lon'

description = 'Carbon mass flux per unit area into atmosphere due to autotrophic respiration on land (respiration by producers) [see rh for heterotrophic production]. Calculated on land-use tiles.'

frequency = 'mon'

id= 'raLut'

long_name = 'Autotrophic Respiration on Land-Use Tile as Carbon Mass Flux [kgC m-2 s-1]'

mipTable= 'Emon'

missing_value = 1e+20

out_name= 'raLut'

prov= 'LUMIP [Lmon_Lut]'

realm = 'land'

standard_name = 'surface_upward_mass_flux_of_carbon_dioxide_expressed_as_carbon_due_to_plant_respiration'

time= 'time'

time_label= 'time-mean'

time_title= 'Temporal mean'

title = 'Autotrophic Respiration on Land-Use Tile as Carbon Mass Flux [kgC m-2 s-1]'

type= 'real'

units = 'kg m-2 s-1'

variable_id = 'raLut'

landuse

Size: 4x1

Dimensions: landuse

Datatype: int32

Attributes:

coords= 'type_description'

requested = 'primary_and_secondary_land=0, pastures=1, crops=2, urban=3'

standard_name = 'area_type'

title = 'Land use type'

type= 'int'

units = '1'

lat

Size: 192x1

Dimensions: lat

Datatype: double

Attributes:

axis= 'Y'

bounds= 'lat_bnds'

standard_name = 'latitude'

title = 'Latitude'

type= 'double'

units = 'degrees_north'

valid_max = 90

valid_min = -90

lon

Size: 288x1

Dimensions: lon

Datatype: double

Attributes:

axis= 'X'

bounds= 'lon_bnds'

standard_name = 'longitude'

title = 'Longitude'

type= 'double'

units = 'degrees_east'

valid_max = 360

valid_min = 0

time

Size: 600x1

Dimensions: time

Datatype: double

Attributes:

axis= 'T'

bounds= 'time_bnds'

standard_name = 'time'

title = 'time'

type= 'double'

units = 'days since 0001-01-01 00:00:00'

calendar= '365_day'

time_bnds

Size: 2x600

Dimensions: hist_interval,time

Datatype: double

Attributes:

calendar = 'noleap'

units= 'days since 0001-01-01 00:00:00'

lat_bnds

Size: 2x192

Dimensions: hist_interval,lat

Datatype: single

Attributes:

units = 'degrees_north'

lon_bnds

Size: 2x288

Dimensions: hist_interval,lon

Datatype: single

Attributes:

units = 'degrees_east'

**F-1 total n added for cropland fertilization**

Format: netcdf4_classic

Global Attributes:

Conventions = 'CF-1.7 CMIP-6.2'

activity_id = 'ScenarioMIP'

branch_method = 'standard'

branch_time_in_child= 60265

branch_time_in_parent = 60265

creation_date = '2019-08-19T03:48:35Z'

data_specs_version= '01.00.28'

experiment= 'update of RCP2.6 based on SSP1'

experiment_id = 'ssp126'

external_variables= 'areacella'

forcing_index = 2

frequency = 'mon'

further_info_url= 'https://furtherinfo.es-doc.org/CMIP6.MIROC.MIROC-ES2L.ssp126.none.r1i1p1f2'

grid= 'native atmosphere T42 Gaussian grid'

grid_label= 'gn'

history = '2019-08-19T03:48:35Z ; CMOR rewrote data to be consistent with CMIP6, CF-1.7 CMIP-6.2 and CF standards.'

initialization_index= 1

institution = 'JAMSTEC (Japan Agency for Marine-Earth Science and Technology, Kanagawa 236-0001, Japan), AORI (Atmosphere and Ocean Research Institute, The University of Tokyo, Chiba 277-8564, Japan), NIES (National Institute for Environmental Studies, Ibaraki 305-8506, Japan), and R-CCS (RIKEN Center for Computational Science, Hyogo 650-0047, Japan)'

institution_id= 'MIROC'

mip_era = 'CMIP6'

nominal_resolution= '500 km'

parent_activity_id= 'CMIP'

parent_experiment_id= 'historical'

parent_mip_era= 'CMIP6'

parent_source_id= 'MIROC-ES2L'

parent_time_units = 'days since 1850-1-1'

parent_variant_label= 'r1i1p1f2'

physics_index = 1

product = 'model-output'

realization_index = 1

realm = 'land'

source= 'MIROC-ES2L (2018):

aerosol: SPRINTARS6.0

atmos: CCSR AGCM (T42; 128 x 64 longitude/latitude; 40 levels; top level 3 hPa)

atmosChem: none

land: MATSIRO6.0+VISIT-e ver.1.0

landIce: none

ocean: COCO4.9 (tripolar primarily 1deg; 360 x 256 longitude/latitude; 63 levels; top grid cell 0-2 m)

ocnBgchem: OECO ver.2.0; NPZD-type with C/N/P/Fe/O cycles

seaIce: COCO4.9'

source_id = 'MIROC-ES2L'

source_type = 'AOGCM AER BGC'

sub_experiment= 'none'

sub_experiment_id = 'none'

table_id= 'Emon'

table_info= 'Creation Date:(06 November 2018) MD5:0728c79344e0f262bb76e4f9ff0d9afc'

title = 'MIROC-ES2L output prepared for CMIP6'

variable_id = 'fNfert'

variant_label = 'r1i1p1f2'

license = 'CMIP6 model data produced by MIROC is licensed under a Creative Commons Attribution ShareAlike 4.0 International License (https://creativecommons.org/licenses/). Consult https://pcmdi.llnl.gov/CMIP6/TermsOfUse for terms of use governing CMIP6 output, including citation requirements and proper acknowledgment. Further information about this data, including some limitations, can be found via the further_info_url (recorded as a global attribute in this file). The data producers and data providers make no warranty, either express or implied, including, but not limited to, warranties of merchantability and fitness for a particular purpose. All liabilities arising from the supply of the information (including any liability arising in negligence) are excluded to the fullest extent permitted by law.'

cmor_version= '3.3.2'

tracking_id = 'hdl:21.14100/d76c8ed7-800b-4bfd-8c12-6dcafc91b223'

Dimensions:

time = 1032(UNLIMITED)

lat= 64

lon= 128

bnds = 2

Variables:

time

Size: 1032x1

Dimensions: time

Datatype: double

Attributes:

bounds= 'time_bnds'

units = 'days since 1850-1-1'

calendar= 'gregorian'

axis= 'T'

long_name = 'time'

standard_name = 'time'

time_bnds

Size: 2x1032

Dimensions: bnds,time

Datatype: double

lat

Size: 64x1

Dimensions: lat

Datatype: double

Attributes:

bounds= 'lat_bnds'

units = 'degrees_north'

axis= 'Y'

long_name = 'Latitude'

standard_name = 'latitude'

lat_bnds

Size: 2x64

Dimensions: bnds,lat

Datatype: double

lon

Size: 128x1

Dimensions: lon

Datatype: double

Attributes:

bounds= 'lon_bnds'

units = 'degrees_east'

axis= 'X'

long_name = 'Longitude'

standard_name = 'longitude'

lon_bnds

Size: 2x128

Dimensions: bnds,lon

Datatype: double

fNfert

Size: 128x64x1032

Dimensions: lon,lat,time

Datatype: single

Attributes:

standard_name = 'tendency_of_soil_mass_content_of_nitrogen_compounds_expressed_as_nitrogen_due_to_fertilization'

long_name = 'total N added for cropland fertilisation (artificial and manure)'

comment = 'relative to total land area of a grid cell, not relative to agricultural area'

units = 'kg m-2 s-1'

original_name = 'LNFRTNO3+LNFRTNH'

cell_methods= 'area: mean where land time: mean'

cell_measures = 'area: areacella'

history = '2019-08-19T03:48:35Z altered by CMOR: replaced missing value flag (-999) with standard missing value (1e+20). 2019-08-19T03:48:35Z altered by CMOR: Inverted axis: lat.'

missing_value = 1.000000020040877e+20

_FillValue= 1.000000020040877e+20

**F-2 nitrogen mass flux out of land due to any human activity**

Format: netcdf4_classic

Global Attributes:

CDO = 'Climate Data Operators version 2.0.0rc2 (https://mpimet.mpg.de/cdo)'

Conventions = 'CF-1.7 CMIP-6.2'

activity_id = 'ScenarioMIP'

branch_method = 'standard'

branch_time_in_child= 60265

branch_time_in_parent = 60265

contact = 'cmip6-mpi-esm@dkrz.de'

creation_date = '2021-11-23T20:44:07Z'

data_specs_version= '01.00.30'

experiment= 'update of RCP2.6 based on SSP1'

experiment_id = 'ssp126'

external_variables= 'areacella'

forcing_index = 1

frequency = 'mon'

further_info_url= 'https://furtherinfo.es-doc.org/CMIP6.MPI-M.MPI-ESM1-2-LR.ssp126.none.r11i1p1f1'

grid= 'gn'

grid_label= 'gn'

history = '2021-11-23T20:44:07Z ; CMOR rewrote data to be consistent with CMIP6, CF-1.7 CMIP-6.2 and CF standards.'

initialization_index= 1

institution = 'Max Planck Institute for Meteorology, Hamburg 20146, Germany'

institution_id= 'MPI-M'

mip_era = 'CMIP6'

nominal_resolution= '250 km'

parent_activity_id= 'CMIP'

parent_experiment_id= 'historical'

parent_mip_era= 'CMIP6'

parent_source_id= 'MPI-ESM1-2-LR'

parent_time_units = 'days since 1850-1-1 00:00:00'

parent_variant_label= 'r11i1p1f1'

physics_index = 1

product = 'model-output'

project_id= 'CMIP6'

realization_index = 11

realm = 'land'

references= 'MPI-ESM: Mauritsen, T. et al. (2019), Developments in the MPI‐M Earth System Model version 1.2 (MPI‐ESM1.2) and Its Response to Increasing CO2, J. Adv. Model. Earth Syst.,11, 998-1038, doi:10.1029/2018MS001400,

Mueller, W.A. et al. (2018): A high‐resolution version of the Max Planck Institute Earth System Model MPI‐ESM1.2‐HR. J. Adv. Model. EarthSyst.,10,1383–1413, doi:10.1029/2017MS001217'

source= 'MPI-ESM1.2-LR (2017):

aerosol: none, prescribed MACv2-SP

atmos: ECHAM6.3 (spectral T63; 192 x 96 longitude/latitude; 47 levels; top level 0.01 hPa)

atmosChem: none

land: JSBACH3.20

landIce: none/prescribed

ocean: MPIOM1.63 (bipolar GR1.5, approximately 1.5deg; 256 x 220 longitude/latitude; 40 levels; top grid cell 0-12 m)

ocnBgchem: HAMOCC6

seaIce: unnamed (thermodynamic (Semtner zero-layer) dynamic (Hibler 79) sea ice model)'

source_id = 'MPI-ESM1-2-LR'

source_type = 'AOGCM BGC'

sub_experiment= 'none'

sub_experiment_id = 'none'

table_id= 'Emon'

table_info= 'Creation Date:(09 May 2019) MD5:5f007c16960eee824e07a4ce809e3ed1'

title = 'MPI-ESM1-2-LR output prepared for CMIP6'

variable_id = 'fNAnthDisturb'

variant_label = 'r11i1p1f1'

license = 'CMIP6 model data produced by MPI-M is licensed under a Creative Commons Attribution ShareAlike 4.0 International License (https://creativecommons.org/licenses). Consult https://pcmdi.llnl.gov/CMIP6/TermsOfUse for terms of use governing CMIP6 output, including citation requirements and proper acknowledgment. Further information about this data, including some limitations, can be found via the further_info_url (recorded as a global attribute in this file) and. The data producers and data providers make no warranty, either express or implied, including, but not limited to, warranties of merchantability and fitness for a particular purpose. All liabilities arising from the supply of the information (including any liability arising in negligence) are excluded to the fullest extent permitted by law.'

cmor_version= '3.6.0'

tracking_id = 'hdl:21.14100/e6581d23-3cf2-4742-a87b-70426d21f6c7'

Dimensions:

time = 240 (UNLIMITED)

lat= 96

lon= 192

bnds = 2

Variables:

time

Size: 240x1

Dimensions: time

Datatype: double

Attributes:

bounds= 'time_bnds'

units = 'days since 1850-1-1 00:00:00'

calendar= 'proleptic_gregorian'

axis= 'T'

long_name = 'time'

standard_name = 'time'

time_bnds

Size: 2x240

Dimensions: bnds,time

Datatype: double

lat

Size: 96x1

Dimensions: lat

Datatype: double

Attributes:

bounds= 'lat_bnds'

units = 'degrees_north'

axis= 'Y'

long_name = 'Latitude'

standard_name = 'latitude'

lat_bnds

Size: 2x96

Dimensions: bnds,lat

Datatype: double

lon

Size: 192x1

Dimensions: lon

Datatype: double

Attributes:

bounds= 'lon_bnds'

units = 'degrees_east'

axis= 'X'

long_name = 'Longitude'

standard_name = 'longitude'

lon_bnds

Size: 2x192

Dimensions: bnds,lon

Datatype: double

fNAnthDisturb

Size: 192x96x240

Dimensions: lon,lat,time

Datatype: single

Attributes:

standard_name = 'tendency_of_atmosphere_mass_content_of_nitrogen_compounds_expressed_as_nitrogen_due_to_anthropogenic_emission'

long_name = 'Nitrogen Mass Flux out of Land Due to any Human Activity'

comment = 'In contrast to the carbon flux fAnthDisturb, the corresponding N flux is non-zero, because nitrogen reaches the atmosphere directly while carbon only via product pools. An exception is N from crop harvest., ScenarioMIP_table_comment: will require some careful definition to make sure we capture everything - any human activity that releases nitrogen from landinstead of into product pool goes here. E.g. Deforestation fire, harvest assumed to decompose straight away, grazing...'

units = 'kg m-2 s-1'

original_name = 'fNAnthDisturb'

cell_methods= 'area: mean where land time: mean'

cell_measures = 'area: areacella'

history = '2021-11-23T20:44:07Z altered by CMOR: replaced missing value flag (-9e+33) and corresponding data with standard missing value (1e+20). 2021-11-23T20:44:07Z altered by CMOR: Inverted axis: lat.'

missing_value = 1.000000020040877e+20

_FillValue= 1.000000020040877e+20

**F-3 content of nox expressed as nitrogen due to emission**

Format: netcdf4_classic

Global Attributes:

Conventions = 'CF-1.7 CMIP-6.2'

activity_id = 'ScenarioMIP'

branch_method = 'standard'

branch_time_in_child= 60265

branch_time_in_parent = 60265

contact = 'cmip6-mpi-esm@dkrz.de'

creation_date = '2019-10-29T16:24:02Z'

data_specs_version= '01.00.30'

experiment= 'update of RCP2.6 based on SSP1'

experiment_id = 'ssp126'

external_variables= 'areacella'

forcing_index = 1

frequency = 'mon'

further_info_url= 'https://furtherinfo.es-doc.org/CMIP6.MPI-M.MPI-ESM1-2-LR.ssp126.none.r1i1p1f1'

grid= 'gn'

grid_label= 'gn'

history = '2019-10-29T16:24:02Z ; CMOR rewrote data to be consistent with CMIP6, CF-1.7 CMIP-6.2 and CF standards.'

initialization_index= 1

institution = 'Max Planck Institute for Meteorology, Hamburg 20146, Germany'

institution_id= 'MPI-M'

mip_era = 'CMIP6'

nominal_resolution= '250 km'

parent_activity_id= 'CMIP'

parent_experiment_id= 'historical'

parent_mip_era= 'CMIP6'

parent_source_id= 'MPI-ESM1-2-LR'

parent_time_units = 'days since 1850-1-1 00:00:00'

parent_variant_label= 'r1i1p1f1'

physics_index = 1

product = 'model-output'

project_id= 'CMIP6'

realization_index = 1

realm = 'land'

references= 'MPI-ESM: Mauritsen, T. et al. (2019), Developments in the MPI‐M Earth System Model version 1.2 (MPI‐ESM1.2) and Its Response to Increasing CO2, J. Adv. Model. Earth Syst.,11, 998-1038, doi:10.1029/2018MS001400,

Mueller, W.A. et al. (2018): A high‐resolution version of the Max Planck Institute Earth System Model MPI‐ESM1.2‐HR. J. Adv. Model. EarthSyst.,10,1383–1413, doi:10.1029/2017MS001217'

source= 'MPI-ESM1.2-LR (2017):

aerosol: none, prescribed MACv2-SP

atmos: ECHAM6.3 (spectral T63; 192 x 96 longitude/latitude; 47 levels; top level 0.01 hPa)

atmosChem: none

land: JSBACH3.20

landIce: none/prescribed

ocean: MPIOM1.63 (bipolar GR1.5, approximately 1.5deg; 256 x 220 longitude/latitude; 40 levels; top grid cell 0-12 m)

ocnBgchem: HAMOCC6

seaIce: unnamed (thermodynamic (Semtner zero-layer) dynamic (Hibler 79) sea ice model)'

source_id = 'MPI-ESM1-2-LR'

source_type = 'AOGCM'

sub_experiment= 'none'

sub_experiment_id = 'none'

table_id= 'Emon'

table_info= 'Creation Date:(09 May 2019) MD5:e6ef8ececc8f338646ebfb3aeed36bfc'

title = 'MPI-ESM1-2-LR output prepared for CMIP6'

variable_id = 'nLand'

variant_label = 'r1i1p1f1'

license = 'CMIP6 model data produced by MPI-M is licensed under a Creative Commons Attribution ShareAlike 4.0 International License (https://creativecommons.org/licenses). Consult https://pcmdi.llnl.gov/CMIP6/TermsOfUse for terms of use governing CMIP6 output, including citation requirements and proper acknowledgment. Further information about this data, including some limitations, can be found via the further_info_url (recorded as a global attribute in this file) and. The data producers and data providers make no warranty, either express or implied, including, but not limited to, warranties of merchantability and fitness for a particular purpose. All liabilities arising from the supply of the information (including any liability arising in negligence) are excluded to the fullest extent permitted by law.'

cmor_version= '3.5.0'

tracking_id = 'hdl:21.14100/e960d134-aa84-46d1-89dc-ee9814c9dde2'

Dimensions:

time = 240 (UNLIMITED)

lat= 96

lon= 192

bnds = 2

Variables:

time

Size: 240x1

Dimensions: time

Datatype: double

Attributes:

bounds= 'time_bnds'

units = 'days since 1850-1-1 00:00:00'

calendar= 'proleptic_gregorian'

axis= 'T'

long_name = 'time'

standard_name = 'time'

time_bnds

Size: 2x240

Dimensions: bnds,time

Datatype: double

lat

Size: 96x1

Dimensions: lat

Datatype: double

Attributes:

bounds= 'lat_bnds'

units = 'degrees_north'

axis= 'Y'

long_name = 'Latitude'

standard_name = 'latitude'

lat_bnds

Size: 2x96

Dimensions: bnds,lat

Datatype: double

lon

Size: 192x1

Dimensions: lon

Datatype: double

Attributes:

bounds= 'lon_bnds'

units = 'degrees_east'

axis= 'X'

long_name = 'Longitude'

standard_name = 'longitude'

lon_bnds

Size: 2x192

Dimensions: bnds,lon

Datatype: double

nLand

Size: 192x96x240

Dimensions: lon,lat,time

Datatype: single

Attributes:

standard_name = 'mass_content_of_nitrogen_in_vegetation_and_litter_and_soil_and_forestry_and_agricultural_products'

long_name = 'Total Nitrogen in All Terrestrial Nitrogen Pools'

comment = 'Report missing data over ocean grid cells. For fractional land report value averaged over the land fraction.'

units = 'kg m-2'

original_name = 'nLand'

cell_methods= 'area: mean where land time: mean'

cell_measures = 'area: areacella'

history = '2019-10-29T16:24:02Z altered by CMOR: replaced missing value flag (-9e+33) and corresponding data with standard missing value (1e+20). 2019-10-29T16:24:03Z altered by CMOR: Inverted axis: lat.'

missing_value = 1.000000020040877e+20

_FillValue= 1.000000020040877e+20

# Appendix 2

**Description of algorithm parameters**

**Decision tree**

**Analysis procedure**

1. Through the training set data, the regression model of decision number is established, and the structure of decision tree is obtained.

2. The feature importance is calculated by the decision tree.

3. The established decision tree regression model is applied to the training and testing data, and the model evaluation results are obtained.

4. Due to the randomness of the decision tree, the results of each operation are different. If the training model is saved, the subsequent data can be directly uploaded into the training model for calculation and prediction.

5. Note: Decision trees cannot get a definite equation like traditional models, and the model is usually evaluated by testing the prediction accuracy of the data.

**Detailed conclusion**

Output result: model parameters

Parameter name: Parameter value

The training time: 0.013 seconds

Data segmentation: 0.7

Data shuffle: No

Cross verify: No

Evaluation criteria for node splitting: friedman_mse

The selection criteria of feature dividing points: the best

The maximum feature proportion considered in the partition: None

Minimum sample number of internal node splits: 2

The minimum sample number of leaf nodes: 1

The minimum weight of the sample in the leaf node: 0

Maximum depth of tree: 10

Maximum number of leaf nodes: 50

The threshold of node partition impurity: 0

**Random forest**

**Analysis procedure**

1. The random forest regression model is built by training set data.

2. Feature importance was calculated by establishing random forests.

3. The established random forest regression model is applied to the training and testing data, and the model evaluation results are obtained.

4. Due to the randomness of the random forest, the results of each operation are different. If the training model is saved, the subsequent data can be directly uploaded and substituted into the training model for calculation and prediction.

5. Note: Random forests cannot be determined by the same equations as traditional models, and the model is usually evaluated by testing the prediction accuracy of the data.

**Detailed conclusion**

Output result: model parameters

Parameter name: Parameter value

The training time: 0.092 seconds

Data segmentation: 0.7

Data shuffle: No

Cross verify: No

Node split evaluation criteria: mse

The maximum feature proportion considered in the partition: None

Minimum sample number of internal node splits: 2

The minimum sample number of leaf nodes: 1

The minimum weight of the sample in the leaf node: 0

Maximum depth of tree: 10

Maximum number of leaf nodes: 50

The threshold of node partition impurity: 0

Number of decision trees: 100

There is put back sampling: True

Out-of-pocket data test: False

**Extra tree**

**Analysis procedure**

1. ExtraTrees regression model is built through training set data.

2. The feature importance is calculated by the ExtraTrees established.

3. The ExtraTrees regression model is applied to the training and testing data, and the model evaluation results are obtained.

4. Due to the randomness of ExtraTrees, the results of each operation are different. If the training model is saved, the subsequent data can be directly uploaded into the training model for calculation and prediction.

5. Note: ExtraTrees cannot obtain a definite equation like traditional models, and the model is usually evaluated by testing the prediction accuracy of the data.

**Detailed conclusion**

Output result: model parameters

Parameter name: Parameter value

The training time: 0.101s

Data segmentation: 0.7

Data shuffle: No

Cross verify: No

Node split evaluation criteria: mse

The maximum feature proportion considered in the partition: None

Minimum sample number of internal node splits: 2

The minimum sample number of leaf nodes: 1

The minimum weight of the sample in the leaf node: 0

Maximum depth of tree: 10

Maximum number of leaf nodes: 50

The threshold of node partition impurity: 0

Number of decision trees: 100

There is put back sampling: True

Out-of-pocket data test: False

**Adaboost**

**Analysis procedure**

1. The adaboost regression model was established through the training set data.

2. The feature importance was calculated by establishing the adaboost.

3. The established adaboost regression model is applied to the training and testing data, and the model evaluation results are obtained.

4. Due to the randomness of adaboost, the results of each operation are different. If this training model is saved, the subsequent data can be directly uploaded and substituted into this training model for calculation and prediction.

5. Note: adaboost is not able to obtain definitive equations like traditional models, and the model is usually evaluated by testing the prediction accuracy of the data.

**Detailed conclusion**

Output result: model parameters

Parameter name: Parameter value

The training time: 0.112s

Data segmentation: 0.7

Data shuffle: No

Cross verify: No

Number of base classifiers: 100

Loss function: Linear

Base classifier: Decision tree classifier

Learning rate: 1

**GBDT**

**Analysis procedure**

1. The gradient lifting tree (GBDT) regression model is built by training set data.

2. The feature importance was calculated by the established gradient lifting tree (GBDT).

3. The established gradient lifting tree (GBDT) regression model is applied to the training and testing data, and the model evaluation results are obtained.

4. Due to the randomness of the gradient lift tree (GBDT), the results of each operation are different. If the training model is saved, the subsequent data can be directly uploaded into the training model for calculation and prediction.

5. Note: Gradient lift tree (GBDT) can not get a definite equation like the traditional model, and the model is usually evaluated by testing the prediction accuracy of the data.

**Detailed conclusion**

Output result: model parameters

Parameter name: Parameter value

The training time: 0.049 seconds

Data segmentation: 0.7

Data shuffle: No

Cross verify: No

Loss function: friedman_mse

Evaluation criteria for node splitting: friedman_mse

Number of base learners: 100

Learning rate: 0.1

None sampling ratio: 1

The maximum feature proportion considered in the partition: None

Minimum sample number of internal node splits: 2

The minimum sample number of leaf nodes: 1

The minimum weight of the sample in the leaf node: 0

Maximum depth of tree: 10

Maximum number of leaf nodes: 50

The threshold of node partition impurity: 0

**Catboost**

**Analysis procedure**

1. The CatBoost regression model is built by training set data.

2. The feature importance is calculated by the established CatBoost.

3. The established CatBoost regression model is applied to the training and testing data, and the model evaluation results are obtained.

4. Due to the randomness of CatBoost, the results of each operation are different. If this training model is saved, the subsequent data can be directly uploaded and substituted into this training model for calculation and prediction.

5. Note: CatBoost is not able to obtain definitive equations like traditional models, and the model is usually evaluated by testing the prediction accuracy of the data.

**Detailed conclusion**

Output result: model parameters

Parameter name: Parameter value

The training time: 0.177s

Data segmentation: 0.7

Data shuffle: No

Cross verify: No

Number of iterations: 100

Learning rate: 0.1

L2 regular term: 1

Maximum depth of tree: 10

The overfitting detection threshold: 0

The number of iterations that continue after optimization: 20

**Xgboost**

**Analysis procedure**

1. The XgBoost regression model is built through the training set data.

2. Feature importance is calculated by establishing XgBoost.

3. The established XgBoost regression model is applied to the training and testing data, and the model evaluation results are obtained.

4. Due to the randomness of XgBoost, the results of each operation are different. If this training model is saved, the subsequent data can be directly uploaded and substituted into this training model for calculation and prediction.

5. Note: XgBoost cannot get definitive equations like traditional models, and the model is usually evaluated by testing the prediction accuracy of the data.

**Detailed conclusion**

Output result: model parameters

Parameter name: Parameter value

The training time: 0.431 seconds

Data segmentation: 0.7

Data shuffle: No

Cross verify: No

Base learner gbtree

Number of base learners: 100

Learning rate: 0.1

L1 regular term: 0

L2 regular term: 1

Sample collection sampling rate: 1

Tree feature sampling rate: 1

Node feature sampling rate: 1

The minimum weight of the sample in the leaf node: 0

Maximum depth of tree: 10

**LightGBM**

**Analysis procedure**

1.Establish a LightGBM regression model through training set data.

2.Calculate feature importance through the established LightGBM.

3.Apply the established LightGBM regression model to training and test data to obtain model evaluation results.

4.Since LightGBM is random and the results of each operation are different. If the current training model is saved, subsequent data can be directly uploaded and substituted into the current training model for calculation and prediction.

5.Note: LightGBM cannot obtain a definite equation like traditional models. Usually, the model is evaluated by the prediction accuracy of test data.

**Detailed conclusion**

Output result 1: Model parameters

Parameter name Parameter value

Training time 0.025s

Data splitting 0.7

Data shuffling No

Cross-validation No

Base learner gbdt

Number of base learners 100

Learning rate 0.1

L1 regularization term 0

L2 regularization term 1

Sample feature sampling rate 1

Tree feature sampling rate 1

Node splitting threshold 0

Minimum weight of samples in leaf nodes 0

Maximum depth of tree 10

Minimum number of samples in leaf nodes 10
