# Supplementary material for: Future-Proofing China's Rivers: Balancing Nitrogen Emission Standards Amidst Climate Change
Source: Research Square preprint supplement (doi:10.21203/rs.3.rs-5257861/v1), 2024-11-28
Supplement: Supplementary file 2 [file adfc48d56974dbe1bdc82280.xlsx]

## Sheet: Topics and contents
Supplementary Material C Figure data and calculation process
Table SC1 Monthly fluxes (in year 2015) in the ten major river basins in mainland China.
Table SC2 The results of fitting the total nitrogen concentration of rivers according to the main sources and sinks of nitrogen.
(a) Figure 2-a of the manuscript The dimension reduction process of variables and the results of principal component analysis.
(b) Figure 2-a of the manuscript Feature importance of fitting influencing factors.
(c) Figure 2-b of the manuscript Dividing the section into 10 color gradations according to precipitation flux, nitrogen mass in soil pool, and population density.
(d) Figure 2-c of the manuscript The abscissa 1–10 respectively represents the section grouping corresponding to the 10 color gradations divided by precipitation flux.
(e) Figure 2-c of the manuscript The abscissa 1–10 respectively represents the section grouping corresponding to the 10 color gradations divided by nitrogen mass in soil pool.
(f) Figure 2-c of the manuscript The abscissa 1–10 respectively represents the section grouping corresponding to the 10 color gradations divided by population density.
Table SC3 The flux changes of the selected variables under four climate change scenarios.
(a) The changes of 11 variables under the SSP1-2.6 scenario from 2015 to 2050.
(b) The changes of 11 variables under the SSP2-4.5 scenario from 2015 to 2050.
(c) The changes of 11 variables under the SSP3-7.0 scenario from 2015 to 2050.
(d) The changes of 11 variables under the SSP5-8.5 scenario from 2015 to 2050.
Table SC4 Historical simulation in 2015 and simulation of different climate change and emission reduction scenarios in 2050.
Table SC5 Judge the emission reduction policy according to the background concentration of the sampling sites.
(a) The background concentration of each sampling sites in January and July.
(b) According to background concentration estimation, the seasonal differences in average concentrations of climate change patterns of SSP1-2.6 and SSP3-7.0, and the changes in average concentrations after adopting three emission standards.
(c) In order to meet the Class Ⅲ water quality standard for surface water environment, the requirements for implementing a dual-season nitrogen emission policy in winter (January) and summer (July).

## Sheet: SC1
		Ⅰ	Ⅱ	Ⅲ	Ⅳ-1	Ⅳ-2	Ⅳ-3	Ⅳ-4	A-1	A-2	A-3	A-4	B-1	B-2	B-3	B-4	B-5	B-6	B-7	C-1	C-2	C-3	C-4	C-5	C-6	C-7	D-1	D-2	D-3	D-4	D-5	D-6	E-1	E-2	E-3	F-1	F-2	F-3	population density
		K		mm s⁻¹	kg m-2 s⁻¹	mg L-1	kg m-2 s⁻¹	kg m-2 s⁻¹	kg m-2 s⁻¹	kg m-2 s⁻¹	kg m-2 s⁻¹	kg m-2 s⁻¹	kg m-2 s⁻¹	kg m-2 s⁻¹	kg m-2 s⁻¹	kg m-2 s⁻¹	kg m-2 s⁻¹	kg m-2 s⁻¹	kg m-2 s⁻¹	kg m-2 s⁻¹	kg m-2 s⁻¹	kg m-2 s⁻¹	kg m-2 s⁻¹	kg m-2 s⁻¹	kg m-2 s⁻¹	kg m-2 s⁻¹	kg m-2 s⁻¹	kg m-2 s⁻¹	kg m-2 s⁻¹	kg m-2 s⁻¹	kg m-2 s⁻¹	kg m-2 s⁻¹	kg m-2 s⁻¹	kg m-2 s⁻¹	kg m-2 s⁻¹	kg m-2 s⁻¹	kg m-2 s⁻¹	kg m-2 s⁻¹	person per square kilometer
PR	Median	268.904	0.183691	1.23137e-05	4.63483e-06	321.022	3.98741e-08	4.91971e-06	1.59437e-08	3.3302e-08	1.86758e-08	4.94969e-13	2.25471e-11	8.13306e-05	1.49524e-12	1.01259e-11	5.25364e-12	2.05119e-12	1.32997e-11	0.000401593	0.00343084	0.574735	53.4138	7.60195e-06	3.44793e-11	0.323197	4.08699e-10	2.25613e-09	9.44287e-11	3.47832e-10	4.23436e-10	2.52804e-11	0.083329	0.002194	7.71561e-09	1.0704e-12	8.8798e-14	1.1861e-14	302.757
	Standard deviation	14.844	0.555761	3.17483e-05	2.73359e-05	88.5246	7.37464e-08	2.61801e-05	2.10141e-08	2.2327e-08	1.29505e-08	1.23494e-12	2.59716e-11	8.12657e-05	1.14204e-12	1.1756e-11	7.91887e-12	1.49023e-12	1.43615e-11	0.000389046	0.00195762	0.354078	6.17649	9.63601e-06	8.19056e-11	0.253443	1.02465e-09	4.69874e-09	2.26909e-10	4.27055e-10	4.79975e-10	4.45051e-11	0.145383	0.00601553	1.13259e-08	4.01825e-12	2.99831e-13	1.42719e-13	226.19
SE	Median	268.604	0.162446	1.58927e-05	9.16774e-07	506.598	2.41221e-09	1.2519e-06	2.27537e-08	3.3302e-08	1.64067e-08	3.41258e-12	4.44193e-11	6.14417e-05	3.92951e-12	2.77435e-11	9.20562e-12	4.47122e-12	4.83183e-11	0.000355356	0.000855532	0.926941	53.8198	1.36049e-05	9.25867e-12	0.712345	9.52149e-10	6.58161e-09	3.4571e-10	3.7204e-10	6.58308e-10	6.83289e-11	0.184835	0.00245298	1.28751e-08	1.08131e-11	1.72604e-14	3.80648e-15	359.351
	Standard deviation	15.2721	0.276608	1.79369e-05	3.26737e-06	119.557	9.56578e-09	3.62612e-06	2.67512e-08	2.2327e-08	1.23665e-08	3.11617e-12	2.9891e-11	6.3658e-05	2.16099e-12	1.88398e-11	1.02768e-11	2.01934e-12	3.20111e-11	0.00021245	0.00142313	0.110813	4.70319	1.42737e-05	1.15312e-11	0.0591216	1.73054e-09	7.65734e-09	4.57939e-10	3.28485e-10	5.41123e-10	1.07719e-10	0.189279	0.000808637	1.60568e-08	3.43547e-11	1.99628e-14	8.2823e-15	114.434
YA	Median	268.942	0.263844	1.63725e-05	6.14401e-06	359.752	9.11707e-08	7.68244e-06	1.64044e-08	2.97207e-08	1.52337e-08	1.00859e-12	3.41487e-11	7.61798e-05	1.82571e-12	1.35159e-11	6.65518e-12	4.18902e-12	1.88815e-11	0.000492139	0.00424244	0.652144	53.0704	9.05188e-06	2.62007e-11	0.398644	6.22653e-10	3.46808e-09	1.38273e-10	3.83642e-10	4.85469e-10	2.9698e-11	0.100196	0.00327328	9.11779e-09	2.72292e-12	4.86036e-13	6.57701e-14	286.233
	Standard deviation	14.5205	0.631262	3.77938e-05	3.01519e-05	147.03	2.9953e-07	3.15328e-05	2.14465e-08	2.2268e-08	3.66142e-09	2.34406e-12	5.08451e-11	7.58939e-05	1.68012e-12	1.53562e-11	9.69898e-12	1.17054e-11	2.24923e-11	0.000471917	0.00494955	0.388724	6.54862	1.08673e-05	5.68863e-11	0.285815	1.39523e-09	6.16481e-09	3.01868e-10	4.54788e-10	5.0747e-10	5.5668e-11	0.162318	0.00667317	1.26816e-08	1.52519e-11	2.62945e-12	4.98756e-13	220.68
HU	Median	268.357	0.148449	1.3071e-05	8.50164e-07	440.086	3.04348e-08	9.80326e-07	1.93723e-08	2.97207e-08	1.81072e-08	2.29402e-12	3.87705e-11	6.4288e-05	3.24986e-12	2.40049e-11	8.26849e-12	3.83114e-12	3.66813e-11	0.000405152	0.00230976	1.00748	53.8005	1.16782e-05	2.09026e-11	0.631232	8.4431e-10	5.41069e-09	2.63567e-10	4.16425e-10	6.26428e-10	5.7262e-11	0.178173	0.00272336	1.20658e-08	7.7137e-12	1.76043e-13	7.61112e-14	346.402
	Standard deviation	15.1728	0.296084	1.63124e-05	3.53481e-06	134.013	1.22146e-07	3.30452e-06	2.37928e-08	2.2268e-08	1.32317e-08	2.8405e-12	2.7871e-11	6.61455e-05	2.00185e-12	1.75446e-11	9.35666e-12	2.5479e-12	2.8406e-11	0.000274526	0.00204461	0.270961	4.97604	1.28529e-05	3.35182e-11	0.14588	1.69963e-09	7.33594e-09	4.02876e-10	4.43022e-10	5.31573e-10	9.09623e-11	0.203427	0.00429644	1.55996e-08	2.9421e-11	6.95173e-13	4.42432e-13	156.119
YE	Median	269.147	0.314014	1.78123e-05	8.93194e-06	359.89	9.34732e-08	9.48194e-06	1.54095e-08	3.24843e-08	1.9658e-08	6.6807e-13	3.19985e-11	8.2071e-05	1.48829e-12	1.08051e-11	6.00639e-12	4.42414e-12	1.59412e-11	0.000376466	0.00352983	0.591545	52.8115	8.57371e-06	3.06452e-11	0.370974	5.95899e-10	3.21391e-09	1.23295e-10	4.03008e-10	4.63446e-10	2.2265e-11	0.0845221	0.00357086	8.76845e-09	1.96922e-12	2.26043e-13	3.35627e-14	248.439
	Standard deviation	14.383	0.740763	4.2707e-05	3.76374e-05	149.898	2.7123e-07	3.59133e-05	1.9323e-08	2.25731e-08	1.2804e-08	1.46013e-12	5.17668e-11	8.11383e-05	1.26171e-12	1.46529e-11	9.3819e-12	1.2885e-11	1.97389e-11	0.000465028	0.00366886	0.382716	6.95894	1.08102e-05	8.53337e-11	0.316498	1.37765e-09	6.16539e-09	2.82926e-10	4.73038e-10	5.29057e-10	4.65772e-11	0.147553	0.00736146	1.24349e-08	5.71068e-12	7.14671e-13	2.34568e-13	210.244
HA	Median	268.119	0.107595	1.15984e-05	9.04565e-07	420.612	9.30746e-09	1.03402e-06	1.54866e-08	3.24843e-08	1.88674e-08	1.87158e-12	3.74316e-11	7.03412e-05	3.01267e-12	2.35687e-11	8.05745e-12	3.26283e-12	3.38116e-11	0.000426535	0.00293606	0.981321	53.7321	1.06871e-05	2.96531e-11	0.570901	6.22734e-10	4.08294e-09	2.13635e-10	3.91279e-10	6.10436e-10	5.148e-11	0.159496	0.00171604	1.02596e-08	4.65148e-12	7.07314e-14	2.70531e-14	322.879
	Standard deviation	14.8016	0.223624	1.49026e-05	3.50956e-06	112.7	6.35976e-08	3.47625e-06	2.05128e-08	2.25731e-08	1.28357e-08	2.59968e-12	2.5936e-11	6.81416e-05	1.71058e-12	1.61365e-11	8.81238e-12	2.04021e-12	2.53811e-11	0.000275298	0.00200267	0.25247	4.81313	1.15557e-05	4.01878e-11	0.148699	1.24032e-09	5.68207e-09	3.55969e-10	3.69053e-10	4.91204e-10	8.26483e-11	0.190355	0.00246634	1.42206e-08	2.23379e-11	4.43142e-13	2.4581e-13	149.011
LR	Median	268.848	0.690849	1.66139e-05	5.28821e-06	151.082	3.88025e-07	1.3838e-06	2.21725e-08	2.02601e-08	1.84932e-08	9.11839e-13	1.76126e-11	2.75871e-05	1.53245e-12	7.3991e-12	4.37613e-12	3.36831e-12	1.14432e-11	6.73017e-05	0.000443208	1.92182	52.5977	1.40417e-05	2.87432e-12	0.805131	2.18206e-09	1.06508e-08	3.21146e-10	1.03662e-09	9.7194e-10	3.19723e-11	0.066992	0.0162308	1.85367e-08	5.1449e-12	3.08753e-12	1.46387e-12	32.2975
	Standard deviation	15.4231	0.85282	1.88181e-05	1.33885e-05	239.321	1.74098e-07	4.0738e-06	2.75369e-08	2.78346e-08	1.8197e-08	1.33788e-12	1.74251e-11	3.01019e-05	1.50519e-12	1.06226e-11	6.36057e-12	3.25066e-12	1.96124e-11	0.000130964	0.000891675	0.382664	7.30003	1.50511e-05	1.30344e-11	0.0682829	3.109e-09	1.06647e-08	5.22615e-10	1.09215e-09	9.08743e-10	4.72551e-11	0.188934	0.00533067	1.92875e-08	2.31213e-11	1.16904e-12	1.29709e-12	101.783
HE	Median	269.209	0.726475	1.5189e-05	4.22774e-06	720.137	2.21876e-06	2.57493e-06	1.90343e-08	2.02601e-08	1.68843e-08	9.08436e-13	2.11584e-11	2.6453e-05	1.43235e-12	7.61393e-12	5.01526e-12	3.72048e-12	1.33733e-11	0.000422299	0.00074358	3.75327	53.261	1.37699e-05	1.50358e-12	0.787039	2.29645e-09	1.29948e-08	2.95872e-10	9.86211e-10	1.01405e-09	2.79404e-11	0.0362902	0.0171744	1.72295e-08	6.75524e-12	4.35873e-12	1.00202e-12	22.742
	Standard deviation	15.1816	0.917337	1.97262e-05	1.5115e-05	695.314	2.60839e-06	1.22779e-05	2.55261e-08	2.78346e-08	1.55704e-08	1.29569e-12	2.33317e-11	2.6535e-05	1.43411e-12	1.04194e-11	7.20611e-12	3.79589e-12	2.07739e-11	0.000432114	0.000762517	2.50831	6.98264	1.4769e-05	7.20696e-12	0.107336	3.31244e-09	1.32704e-08	5.00003e-10	1.04742e-09	9.54775e-10	4.6145e-11	0.135435	0.00485672	1.81046e-08	2.16239e-11	1.75766e-12	1.4732e-12	89.0062
NW	Median	286.059	1.30761	3.12005e-05	8.40738e-06	273.405	6.04922e-07	1.43774e-05	2.89088e-08	1.50391e-08	1.44297e-08	1.43614e-11	9.63742e-11	0.000101337	1.04672e-11	2.76139e-11	1.63184e-11	2.87067e-11	6.89242e-11	0.000955302	0.00316992	0.534063	46.7118	1.48486e-05	3.87008e-11	0.659703	4.70727e-09	2.61455e-08	3.9349e-10	6.32092e-10	6.94048e-10	2.3041e-11	0.0982694	0.00762472	1.78205e-08	7.60779e-11	1.28189e-11	3.90245e-13	51.7498
	Standard deviation	14.1002	0.877775	4.88363e-05	3.53705e-05	204.118	9.43749e-07	3.98519e-05	2.73451e-08	2.26814e-08	1.44914e-08	1.69158e-11	5.96598e-11	8.90516e-05	6.53256e-12	1.74156e-11	3.16877e-11	2.30821e-11	4.5678e-11	0.000863338	0.00465667	0.374372	12.2598	1.28544e-05	7.56263e-11	0.220247	3.65268e-09	1.85078e-08	4.41208e-10	5.04473e-10	5.38708e-10	3.58034e-11	0.154619	0.00869648	1.19144e-08	1.28574e-10	1.80124e-11	1.40648e-12	140.642
SW	Median	271.719	1.45513	7.98863e-05	2.79231e-05	294.336	6.73795e-07	6.22312e-05	2.14091e-08	2.84802e-08	2.67744e-08	4.2056e-12	5.00888e-11	3.27425e-05	2.07664e-12	9.7259e-12	2.41657e-11	5.4093e-12	2.95129e-11	0.000581095	0.00041091	0.970361	48.8267	2.15128e-05	8.57501e-13	0.657482	2.43092e-09	1.24199e-08	3.36719e-10	1.03483e-09	1.10234e-09	3.10606e-11	0.158275	0.017668	2.05771e-08	1.01331e-11	1.73625e-11	8.97286e-13	9.96447
	Standard deviation	10.4493	0.875262	6.77399e-05	5.2065e-05	146.986	6.49411e-07	6.47635e-05	1.89255e-08	2.48412e-08	1.11662e-08	3.04893e-12	5.67261e-11	2.82088e-05	2.27266e-12	9.0043e-12	2.39539e-11	1.05051e-11	1.80468e-11	0.000560388	0.00275278	0.354976	11.5824	1.35706e-05	5.20354e-12	0.235092	2.3962e-09	1.0697e-08	4.04033e-10	5.97868e-10	6.33217e-10	3.4012e-11	0.211002	0.00455093	1.52729e-08	2.47695e-11	1.9204e-11	2.83254e-12	62.3845

## Sheet: SC2-a
Communalities.
	Initial	Extracted
surface runoff flux	1	0.405113
subsurface runoff flux	1	0.664891
litter pool	1	0.280515
precipitation flux	1	0.982536
air tempearture	1	0.822833
soil pool	1	0.72753
minerals and sediments	1	0.586001
soil moisture content	1	0.701446
leaf area index	1	0.741753
evaporation	1	0.857781
population density	1	0.574444
Extraction method: principal component analysis method
Explanation of total variance
Component	Initial eigenvalue			Sum of squared loadings extracted
	Total	Percentage of variance	Cumulative%	Total	Percentage of variance	Cumulative%
1	2.40155	21.8322	21.8322	2.40155	21.8322	21.8322
2	1.58476	14.4069	36.2392	1.58476	14.4069	36.2392
3	1.34762	12.251	48.4902	1.34762	12.251	48.4902
4	1.01066	9.18783	57.678	1.01066	9.18783	57.678
5	1.00026	9.09326	66.7713	1.00026	9.09326	66.7713
6	0.974911	8.86283	75.6341
7	0.884028	8.03662	83.6707
8	0.735143	6.68312	90.3539
9	0.454347	4.13043	94.4843
10	0.391283	3.55712	98.0414
11	0.215444	1.95858	100
Extraction method: principal component analysis method
Component matrix
	Component
	1	2	3	4	5
surface runoff flux	0.0630043	0.0664966	0.225277	0.583823	-0.0715699
subsurface runoff flux	-0.0600612	-0.0118896	-0.0900892	0.799947	0.114502
litter pool	-0.032956	0.503248	-0.113799	-0.10445	0.0480617
precipitation flux	0.0227026	-0.0168706	0.0252543	-0.0473463	0.989372
air tempearture	0.68795	-0.203072	0.551345	-0.0658026	-0.00277873
soil pool	0.234776	0.818887	-0.0404107	0.0141711	-0.000388755
minerals and sediments	0.488197	-0.108705	-0.577771	-0.0426887	-0.0143229
soil moisture content	-0.131033	0.729833	0.387102	-0.0415325	-0.00687945
leaf area index	0.832765	0.0323454	-0.216107	0.0124068	-0.0188038
evaporation	0.801235	-0.0649449	0.459771	0.00995809	0.00989367
population density	-0.522486	-0.255155	0.477271	-0.0917244	-0.0121243
Extraction method: principal component analysis method
Five components were extracted.

## Sheet: SC2-b
NH3	Decision Tree			Random Forest			Adaboost			GBDT			ExtraTree			Catboost			Xgboost			Light GBM			Avg
	surface runoff flux	0.063		surface runoff flux	0.066		surface runoff flux	0.076		surface runoff flux	0.064		surface runoff flux	0.058		surface runoff flux	0.061		surface runoff flux	0.074		surface runoff flux	0.062		surface runoff flux	0.076
	subsurface runoff flux	0.072		subsurface runoff flux	0.092		subsurface runoff flux	0.058		subsurface runoff flux	0.063		subsurface runoff flux	0.047		subsurface runoff flux	0.08		subsurface runoff flux	0.076		subsurface runoff flux	0.057		subsurface runoff flux	0.087
	litter pool	0.07		litter pool	0.062		litter pool	0.064		litter pool	0.066		litter pool	0.052		litter pool	0.06		litter pool	0.065		litter pool	0.057		litter pool	0.058
	precipitation flux	0.114		precipitation flux	0.136		precipitation flux	0.123		precipitation flux	0.126		precipitation flux	0.124		precipitation flux	0.147		precipitation flux	0.13		precipitation flux	0.125		precipitation flux	0.127
	soil pool	0.277		soil pool	0.254		soil pool	0.242		soil pool	0.26		soil pool	0.278		soil pool	0.261		soil pool	0.266		soil pool	0.274		soil pool	0.255
	minerals and sediments	0.057		minerals and sediments	0.054		minerals and sediments	0.054		minerals and sediments	0.05		minerals and sediments	0.057		minerals and sediments	0.042		minerals and sediments	0.042		minerals and sediments	0.064		minerals and sediments	0.048
	leaf area index	0.163		leaf area index	0.161		leaf area index	0.175		leaf area index	0.166		leaf area index	0.19		leaf area index	0.17		leaf area index	0.175		leaf area index	0.175		leaf area index	0.161
	evaporation	0.124		evaporation	0.101		evaporation	0.131		evaporation	0.139		evaporation	0.131		evaporation	0.093		evaporation	0.101		evaporation	0.13		evaporation	0.106
	population density	0.06		population density	0.075		population density	0.076		population density	0.068		population density	0.064		population density	0.087		population density	0.07		population density	0.057		population density	0.083
	Training set	Test set		Training set	Test set		Training set	Test set		Training set	Test set		Training set	Test set		Training set	Test set		Training set	Test set		Training set	Test set		Training set	Test set
MSE	0.111	0.111		0.113	0.105		0.105	0.124		0.113	0.105		0.109	0.115		0.11	0.113		0.111	0.111		0.112	0.109		0.114	0.104
RMSE	0.333	0.333		0.337	0.324		0.325	0.352		0.337	0.324		0.331	0.339		0.332	0.336		0.333	0.334		0.334	0.331		0.337	0.322
MAE	0.16	0.161		0.16	0.161		0.16	0.161		0.162	0.159		0.16	0.161		0.159	0.162		0.16	0.161		0.16	0.16		0.16	0.161
MAPE	96.597	98.978		96.582	99.847		96.264	99.698		96.752	96.442		96.426	100.198		96.248	100.479		96.567	99.046		96.831	98.618		96.599	98.009
R²	0.61	0.18		0.62	0.2		0.62	0.21		0.59	0.24		0.6	0.19		0.59	0.23		0.6	0.23		0.6	0.21		0.59	0.26
TN
	surface runoff flux	0.029		surface runoff flux	0.032		surface runoff flux	0.029		surface runoff flux	0.026		surface runoff flux	0.032		surface runoff flux	0.03		surface runoff flux	0.034		surface runoff flux	0.031		surface runoff flux	0.029
	subsurface runoff flux	0.015		subsurface runoff flux	0.015		subsurface runoff flux	0.014		subsurface runoff flux	0.016		subsurface runoff flux	0.015		subsurface runoff flux	0.02		subsurface runoff flux	0.018		subsurface runoff flux	0.017		subsurface runoff flux	0.018
	litter pool	0.043		litter pool	0.035		litter pool	0.051		litter pool	0.042		litter pool	0.041		litter pool	0.033		litter pool	0.055		litter pool	0.044		litter pool	0.05
	precipitation flux	0.076		precipitation flux	0.08		precipitation flux	0.108		precipitation flux	0.082		precipitation flux	0.073		precipitation flux	0.09		precipitation flux	0.07		precipitation flux	0.08		precipitation flux	0.085
	soil pool	0.454		soil pool	0.492		soil pool	0.461		soil pool	0.482		soil pool	0.468		soil pool	0.478		soil pool	0.474		soil pool	0.457		soil pool	0.468
	minerals and sediments	0.034		minerals and sediments	0.035		minerals and sediments	0.035		minerals and sediments	0.033		minerals and sediments	0.04		minerals and sediments	0.034		minerals and sediments	0.026		minerals and sediments	0.034		minerals and sediments	0.035
	leaf area index	0.192		leaf area index	0.156		leaf area index	0.158		leaf area index	0.163		leaf area index	0.167		leaf area index	0.152		leaf area index	0.142		leaf area index	0.192		leaf area index	0.163
	evaporation	0.105		evaporation	0.113		evaporation	0.105		evaporation	0.123		evaporation	0.114		evaporation	0.12		evaporation	0.142		evaporation	0.095		evaporation	0.111
	population density	0.053		population density	0.041		population density	0.039		population density	0.035		population density	0.051		population density	0.043		population density	0.039		population density	0.05		population density	0.041
	Training set	Test set		Training set	Test set		Training set	Test set		Training set	Test set		Training set	Test set		Training set	Test set		Training set	Test set		Training set	Test set		Training set	Test set
MSE	6.633	6.594		6.713	6.411		6.781	6.251		6.556	6.766		6.593	6.703		6.642	6.594		6.642	6.584		6.682	6.484		6.291	7.415
RMSE	2.575	2.568		2.591	2.532		2.604	2.5		2.56	2.601		2.568	2.589		2.577	2.568		2.577	2.566		2.585	2.546		2.508	2.723
MAE	1.566	1.561		1.563	1.554		1.567	1.541		1.561	1.55		1.547	1.572		1.556	1.566		1.555	1.565		1.558	1.562		1.546	1.579
MAPE	58.145	58.237		58.292	58.256		58.55	58.2		58.364	58.485		58.131	59.405		58.185	58.99		58.151	58.663		58.195	58.57		58.012	59.658
R²	0.9	0.76		0.88	0.79		0.92	0.7		0.93	0.7		0.88	0.79		0.9	0.72		0.9	0.74		0.88	0.79		0.98	0.58

## Sheet: SC2-c
Longitude	Latitude	Rainfall	Soil nitrogen storage	Population density
		mm s-1	kg m-2 s-1	persons km-2
73	20	1.11968e-06	0.218237	1011.85
73.5	20	7.63091e-06	0.218237	510.597
74	20	7.63091e-06	0.138072	526.485
74.5	20	7.63091e-06	0.138072	393.516
75	20	7.63091e-06	0.229674	350.87
75.5	20	7.63091e-06	0.229674	304.702
76	20	5.54423e-06	0.229674	319.364
76.5	20	5.54423e-06	0.197699	287.454
77	20	5.54423e-06	0.197699	265.415
77.5	20	5.54423e-06	0.219385	253.75
78	20	5.54423e-06	0.219385	284.08
78.5	20	5.54423e-06	0.219385	228.127
79	20	6.53313e-06	0.168472	206.648
79.5	20	6.53313e-06	0.168472	182.504
80	20	6.53313e-06	0.200638	217.43
80.5	20	6.53313e-06	0.200638	96.0769
81	20	6.53313e-06	0.200638	95.1609
81.5	20	6.53313e-06	0.0652294	151.837
82	20	8.83064e-06	0.0652294	136.615
82.5	20	8.83064e-06	0.113092	107.226
83	20	8.83064e-06	0.113092	256.632
83.5	20	8.83064e-06	0.113092	263.36
84	20	8.83064e-06	0.0916284	125.059
84.5	20	3.91114e-06	0.0916284	145.388
85	20	3.91114e-06	0.71533	134.17
85.5	20	3.91114e-06	0.71533	428.006
86	20	3.91114e-06	0.71533	1165.27
86.5	20	3.91114e-06	0.638161	779.763
87	20	3.91114e-06	0.638161	704.338
87.5	20	3.20145e-06	0	0
88	20	3.20145e-06	0	0
88.5	20	3.20145e-06	0	0
89	20	3.20145e-06	0	0
89.5	20	3.20145e-06	0	0
90	20	1.13849e-06	0	0
90.5	20	1.13849e-06	0	0
91	20	1.13849e-06	0	0
91.5	20	1.13849e-06	0	0
92	20	1.13849e-06	0	0
92.5	20	1.13849e-06	0	0
93	20	6.09531e-07	0	198.247
93.5	20	6.09531e-07	0	81.1751
94	20	6.09531e-07	1.14975	30.0132
94.5	20	6.09531e-07	1.14975	33.4243
95	20	6.09531e-07	0.357941	113.817
95.5	20	6.09531e-07	0.357941	111.795
96	20	3.49846e-07	0.357941	87.5948
96.5	20	3.49846e-07	0.938327	75.2296
97	20	3.49846e-07	0.938327	87.7856
97.5	20	3.49846e-07	0.952146	76.849
98	20	3.49846e-07	0.952146	14.8956
98.5	20	3.29306e-07	0.952146	11.6363
99	20	3.29306e-07	1.02987	10.9785
99.5	20	3.29306e-07	1.02987	42.2302
100	20	3.29306e-07	1.04702	122.945
100.5	20	3.29306e-07	1.04702	89.1903
101	20	3.29306e-07	1.04702	33.2654
101.5	20	7.50362e-07	0.924608	35.2127
102	20	7.50362e-07	0.924608	23.8296
102.5	20	7.50362e-07	0.932385	28.3868
103	20	7.50362e-07	0.932385	15.7841
103.5	20	7.50362e-07	0.932385	10.9867
104	20	7.50362e-07	0.950578	11.8006
104.5	20	2.32827e-06	0.950578	31.24
105	20	2.32827e-06	0.733205	29.9071
105.5	20	2.32827e-06	0.733205	146.437
106	20	2.32827e-06	0.733205	461.262
106.5	20	2.32827e-06	1.00652	1139
107	20	7.8616e-06	1.00652	919.656
107.5	20	7.8616e-06	0	0
108	20	7.8616e-06	0	312.203
108.5	20	7.8616e-06	0	0
109	20	7.8616e-06	0.939784	0
109.5	20	7.8616e-06	0.939784	0
110	20	6.91835e-06	0.730205	479.311
110.5	20	6.91835e-06	0.730205	1156.36
111	20	6.91835e-06	0.730205	285.2
111.5	20	6.91835e-06	0.643586	0
112	20	6.91835e-06	0.643586	0
112.5	20	1.62995e-05	0	0
113	20	1.62995e-05	0	0
113.5	20	1.62995e-05	0	0
114	20	1.62995e-05	0	0
114.5	20	1.62995e-05	0	0
115	20	1.62995e-05	0	0
115.5	20	3.27478e-05	0	0
116	20	3.27478e-05	0	0
116.5	20	3.27478e-05	0	0
117	20	3.27478e-05	0	0
117.5	20	3.27478e-05	0	0
118	20	3.27478e-05	0	0
118.5	20	2.10127e-05	0	0
119	20	2.10127e-05	0	0
119.5	20	2.10127e-05	0	0
120	20	2.10127e-05	0	0
120.5	20	2.10127e-05	0	0
121	20	2.07167e-05	0	0
121.5	20	2.07167e-05	0	0
122	20	2.07167e-05	0	153.777
122.5	20	2.07167e-05	0	31.7533
123	20	2.07167e-05	0	0
123.5	20	2.07167e-05	0	0
124	20	4.79818e-05	0	0
124.5	20	4.79818e-05	0	0
125	20	4.79818e-05	0	0
125.5	20	4.79818e-05	0	0
126	20	4.79818e-05	0	0
126.5	20	4.79818e-05	0	0
127	20	1.97384e-05	0	0
127.5	20	1.97384e-05	0	0
128	20	1.97384e-05	0	0
128.5	20	1.97384e-05	0	0
129	20	1.97384e-05	0	0
129.5	20	2.14713e-05	0	0
130	20	2.14713e-05	0	0
130.5	20	2.14713e-05	0	0
131	20	2.14713e-05	0	0
131.5	20	2.14713e-05	0	0
132	20	2.14713e-05	0	0
132.5	20	2.31816e-05	0	0
133	20	2.31816e-05	0	0
133.5	20	2.31816e-05	0	0
134	20	2.31816e-05	0	0
134.5	20	2.31816e-05	0	0
135	20	2.63441e-05	0	0
73	20.5	1.11968e-06	0.265811	785.761
73.5	20.5	7.63091e-06	0.265811	572.347
74	20.5	7.63091e-06	0.164384	202.098
74.5	20.5	7.63091e-06	0.164384	357.32
75	20.5	7.63091e-06	0.19841	495.404
75.5	20.5	7.63091e-06	0.19841	328.033
76	20.5	5.54423e-06	0.19841	420.82
76.5	20.5	5.54423e-06	0.161023	345.415
77	20.5	5.54423e-06	0.161023	340.689
77.5	20.5	5.54423e-06	0.162877	395.693
78	20.5	5.54423e-06	0.162877	337.718
78.5	20.5	5.54423e-06	0.162877	203.236
79	20.5	6.53313e-06	0.204167	302.37
79.5	20.5	6.53313e-06	0.204167	166.703
80	20.5	6.53313e-06	0.26851	220.266
80.5	20.5	6.53313e-06	0.26851	146.709
81	20.5	6.53313e-06	0.26851	183.298
81.5	20.5	6.53313e-06	0.113124	312.854
82	20.5	8.83064e-06	0.113124	315.071
82.5	20.5	8.83064e-06	0.0960809	166.063
83	20.5	8.83064e-06	0.0960809	188.791
83.5	20.5	8.83064e-06	0.0960809	312.111
84	20.5	8.83064e-06	0.191668	268.888
84.5	20.5	3.91114e-06	0.191668	170.787
85	20.5	3.91114e-06	0.243615	133.169
85.5	20.5	3.91114e-06	0.243615	372.98
86	20.5	3.91114e-06	0.243615	455.8
86.5	20.5	3.91114e-06	0.384386	836.367
87	20.5	3.91114e-06	0.384386	636.32
87.5	20.5	3.20145e-06	0.437561	407.751
88	20.5	3.20145e-06	0.437561	0
88.5	20.5	3.20145e-06	0.437561	0
89	20.5	3.20145e-06	0	0
89.5	20.5	3.20145e-06	0	0
90	20.5	1.13849e-06	0	0
90.5	20.5	1.13849e-06	0	0
91	20.5	1.13849e-06	0	0
91.5	20.5	1.13849e-06	0	0
92	20.5	1.13849e-06	0	0
92.5	20.5	1.13849e-06	1.25963	215.52
93	20.5	6.09531e-07	1.25963	71.273
93.5	20.5	6.09531e-07	1.25963	68.8214
94	20.5	6.09531e-07	1.04484	22.6269
94.5	20.5	6.09531e-07	1.04484	43.2854
95	20.5	6.09531e-07	0.15681	127.636
95.5	20.5	6.09531e-07	0.15681	115.571
96	20.5	3.49846e-07	0.15681	171.389
96.5	20.5	3.49846e-07	0.205825	102.984
97	20.5	3.49846e-07	0.205825	166.538
97.5	20.5	3.49846e-07	0.104111	118.625
98	20.5	3.49846e-07	0.104111	36.4943
98.5	20.5	3.29306e-07	0.104111	16.5477
99	20.5	3.29306e-07	1.01278	10.7355
99.5	20.5	3.29306e-07	1.01278	19.0261
100	20.5	3.29306e-07	1.04313	43.3633
100.5	20.5	3.29306e-07	1.04313	20.4909
101	20.5	3.29306e-07	1.04313	11.7549
101.5	20.5	7.50362e-07	0.917811	24.3524
102	20.5	7.50362e-07	0.917811	40.0778
102.5	20.5	7.50362e-07	0.954869	33.2388
103	20.5	7.50362e-07	0.954869	17.6134
103.5	20.5	7.50362e-07	0.954869	18.403
104	20.5	7.50362e-07	1.01596	33.3008
104.5	20.5	2.32827e-06	1.01596	41.0454
105	20.5	2.32827e-06	0.757362	77.1721
105.5	20.5	2.32827e-06	0.757362	165.485
106	20.5	2.32827e-06	0.757362	1461.85
106.5	20.5	2.32827e-06	0.863117	1179.49
107	20.5	7.8616e-06	0.863117	1441.78
107.5	20.5	7.8616e-06	0.918759	422.565
108	20.5	7.8616e-06	0.918759	89.2026
108.5	20.5	7.8616e-06	0.918759	0
109	20.5	7.8616e-06	0	0
109.5	20.5	7.8616e-06	0	360.726
110	20.5	6.91835e-06	0.735908	415.158
110.5	20.5	6.91835e-06	0.735908	499.763
111	20.5	6.91835e-06	0.735908	698.528
111.5	20.5	6.91835e-06	0.669565	0
112	20.5	6.91835e-06	0.669565	0
112.5	20.5	1.62995e-05	0	0
113	20.5	1.62995e-05	0	0
113.5	20.5	1.62995e-05	0	0
114	20.5	1.62995e-05	0	0
114.5	20.5	1.62995e-05	0	0
115	20.5	1.62995e-05	0	0
115.5	20.5	3.27478e-05	0	0
116	20.5	3.27478e-05	0	0
116.5	20.5	3.27478e-05	0	0
117	20.5	3.27478e-05	0	0
117.5	20.5	3.27478e-05	0	0
118	20.5	3.27478e-05	0	0
118.5	20.5	2.10127e-05	0	0
119	20.5	2.10127e-05	0	0
119.5	20.5	2.10127e-05	0	0
120	20.5	2.10127e-05	0	0
120.5	20.5	2.10127e-05	0	0
121	20.5	2.07167e-05	0	0
121.5	20.5	2.07167e-05	0	0
122	20.5	2.07167e-05	0	29.5444
122.5	20.5	2.07167e-05	0	0
123	20.5	2.07167e-05	0	0
123.5	20.5	2.07167e-05	0	0
124	20.5	4.79818e-05	0	0
124.5	20.5	4.79818e-05	0	0
125	20.5	4.79818e-05	0	0
125.5	20.5	4.79818e-05	0	0
126	20.5	4.79818e-05	0	0
126.5	20.5	4.79818e-05	0	0
127	20.5	1.97384e-05	0	0
127.5	20.5	1.97384e-05	0	0
128	20.5	1.97384e-05	0	0
128.5	20.5	1.97384e-05	0	0
129	20.5	1.97384e-05	0	0
129.5	20.5	2.14713e-05	0	0
130	20.5	2.14713e-05	0	0
130.5	20.5	2.14713e-05	0	0
131	20.5	2.14713e-05	0	0
131.5	20.5	2.14713e-05	0	0
132	20.5	2.14713e-05	0	0
132.5	20.5	2.31816e-05	0	0
133	20.5	2.31816e-05	0	0
133.5	20.5	2.31816e-05	0	0
134	20.5	2.31816e-05	0	0
134.5	20.5	2.31816e-05	0	0
135	20.5	2.63441e-05	0	0
73	21	1.28331e-06	0.265811	3431.6
73.5	21	5.94739e-06	0.265811	535.013
74	21	5.94739e-06	0.164384	279.467
74.5	21	5.94739e-06	0.164384	349.82
75	21	5.94739e-06	0.19841	345.712
75.5	21	5.94739e-06	0.19841	358.268
76	21	2.4475e-06	0.19841	450.458
76.5	21	2.4475e-06	0.161023	356.991
77	21	2.4475e-06	0.161023	201.495
77.5	21	2.4475e-06	0.162877	223.83
78	21	2.4475e-06	0.162877	362.152
78.5	21	2.4475e-06	0.162877	206.768
79	21	3.01843e-06	0.204167	618.674
79.5	21	3.01843e-06	0.204167	887.447
80	21	3.01843e-06	0.26851	307.289
80.5	21	3.01843e-06	0.26851	322.122
81	21	3.01843e-06	0.26851	266.782
81.5	21	3.01843e-06	0.113124	786.536
82	21	3.99633e-06	0.113124	916.375
82.5	21	3.99633e-06	0.0960809	330.738
83	21	3.99633e-06	0.0960809	234.595
83.5	21	3.99633e-06	0.0960809	265.779
84	21	3.99633e-06	0.191668	402.758
84.5	21	1.48554e-06	0.191668	170.089
85	21	1.48554e-06	0.243615	136.754
85.5	21	1.48554e-06	0.243615	182.518
86	21	1.48554e-06	0.243615	167.599
86.5	21	1.48554e-06	0.384386	419.73
87	21	1.48554e-06	0.384386	671.289
87.5	21	8.11009e-07	0.437561	502.685
88	21	8.11009e-07	0.437561	0
88.5	21	8.11009e-07	0.437561	0
89	21	8.11009e-07	0	0
89.5	21	8.11009e-07	0	0
90	21	1.00429e-06	0	0
90.5	21	1.00429e-06	0	0
91	21	1.00429e-06	0	0
91.5	21	1.00429e-06	0	0
92	21	1.00429e-06	0	2505.86
92.5	21	1.00429e-06	1.25963	391.623
93	21	9.51626e-07	1.25963	29.5618
93.5	21	9.51626e-07	1.25963	10.9539
94	21	9.51626e-07	1.04484	11.0027
94.5	21	9.51626e-07	1.04484	41.8692
95	21	9.51626e-07	0.15681	129.292
95.5	21	9.51626e-07	0.15681	167.427
96	21	1.45438e-06	0.15681	135.565
96.5	21	1.45438e-06	0.205825	111.899
97	21	1.45438e-06	0.205825	54.4953
97.5	21	1.45438e-06	0.104111	56.5006
98	21	1.45438e-06	0.104111	30.1294
98.5	21	1.11578e-06	0.104111	17.5615
99	21	1.11578e-06	1.01278	16.5342
99.5	21	1.11578e-06	1.01278	25.8252
100	21	1.11578e-06	1.04313	41.3183
100.5	21	1.11578e-06	1.04313	22.7205
101	21	1.11578e-06	1.04313	20.6282
101.5	21	9.54018e-07	0.917811	51.1857
102	21	9.54018e-07	0.917811	32.4788
102.5	21	9.54018e-07	0.954869	17.5402
103	21	9.54018e-07	0.954869	23.7332
103.5	21	9.54018e-07	0.954869	96.2053
104	21	9.54018e-07	1.01596	135.589
104.5	21	1.99609e-06	1.01596	86.3092
105	21	1.99609e-06	0.757362	95.8018
105.5	21	1.99609e-06	0.757362	418.081
106	21	1.99609e-06	0.757362	2100.94
106.5	21	1.99609e-06	0.863117	802.557
107	21	4.03634e-06	0.863117	247.169
107.5	21	4.03634e-06	0.918759	124.115
108	21	4.03634e-06	0.918759	130.796
108.5	21	4.03634e-06	0.918759	215.009
109	21	4.03634e-06	0	0
109.5	21	4.03634e-06	0	1494.83
110	21	2.51916e-06	0.735908	472.766
110.5	21	2.51916e-06	0.735908	934.36
111	21	2.51916e-06	0.735908	1189.48
111.5	21	2.51916e-06	0.669565	1796.84
112	21	2.51916e-06	0.669565	0
112.5	21	3.76524e-06	0	0
113	21	3.76524e-06	0	0
113.5	21	3.76524e-06	0	0
114	21	3.76524e-06	0	0
114.5	21	3.76524e-06	0	0
115	21	3.76524e-06	0	0
115.5	21	1.42521e-05	0	0
116	21	1.42521e-05	0	0
116.5	21	1.42521e-05	0	0
117	21	1.42521e-05	0	0
117.5	21	1.42521e-05	0	0
118	21	1.42521e-05	0	0
118.5	21	3.51469e-05	0	0
119	21	3.51469e-05	0	0
119.5	21	3.51469e-05	0	0
120	21	3.51469e-05	0	0
120.5	21	3.51469e-05	0	0
121	21	3.82857e-05	0	0
121.5	21	3.82857e-05	0	0
122	21	3.82857e-05	0	48.0456
122.5	21	3.82857e-05	0	0
123	21	3.82857e-05	0	0
123.5	21	3.82857e-05	0	0
124	21	5.42465e-05	0	0
124.5	21	5.42465e-05	0	0
125	21	5.42465e-05	0	0
125.5	21	5.42465e-05	0	0
126	21	5.42465e-05	0	0
126.5	21	5.42465e-05	0	0
127	21	3.16632e-05	0	0
127.5	21	3.16632e-05	0	0
128	21	3.16632e-05	0	0
128.5	21	3.16632e-05	0	0
129	21	3.16632e-05	0	0
129.5	21	3.21487e-05	0	0
130	21	3.21487e-05	0	0
130.5	21	3.21487e-05	0	0
131	21	3.21487e-05	0	0
131.5	21	3.21487e-05	0	0
132	21	3.21487e-05	0	0
132.5	21	1.8641e-05	0	0
133	21	1.8641e-05	0	0
133.5	21	1.8641e-05	0	0
134	21	1.8641e-05	0	0
134.5	21	1.8641e-05	0	0
135	21	1.69152e-05	0	0
73	21.5	1.28331e-06	0.323261	290.184
73.5	21.5	5.94739e-06	0.323261	396.093
74	21.5	5.94739e-06	0.229405	290.398
74.5	21.5	5.94739e-06	0.229405	289.119
75	21.5	5.94739e-06	0.218504	351.365
75.5	21.5	5.94739e-06	0.218504	303.439
76	21.5	2.4475e-06	0.218504	330.35
76.5	21.5	2.4475e-06	0.201808	303.521
77	21.5	2.4475e-06	0.201808	164.291
77.5	21.5	2.4475e-06	0.19965	111.719
78	21.5	2.4475e-06	0.19965	178.348
78.5	21.5	2.4475e-06	0.19965	192.242
79	21.5	3.01843e-06	0.208833	253.613
79.5	21.5	3.01843e-06	0.208833	186.203
80	21.5	3.01843e-06	0.295613	214.886
80.5	21.5	3.01843e-06	0.295613	318.109
81	21.5	3.01843e-06	0.295613	158.111
81.5	21.5	3.01843e-06	0.191068	312.758
82	21.5	3.99633e-06	0.191068	390.267
82.5	21.5	3.99633e-06	0.198911	429.154
83	21.5	3.99633e-06	0.198911	492.82
83.5	21.5	3.99633e-06	0.198911	349.765
84	21.5	3.99633e-06	0.306719	271.81
84.5	21.5	1.48554e-06	0.306719	218.86
85	21.5	1.48554e-06	0.231859	116.155
85.5	21.5	1.48554e-06	0.231859	137.001
86	21.5	1.48554e-06	0.231859	300.206
86.5	21.5	1.48554e-06	0.221978	160.976
87	21.5	1.48554e-06	0.221978	441.236
87.5	21.5	8.11009e-07	0.315616	766.66
88	21.5	8.11009e-07	0.315616	1177.67
88.5	21.5	8.11009e-07	0.315616	1022.42
89	21.5	8.11009e-07	0	289.619
89.5	21.5	8.11009e-07	0	195.914
90	21.5	1.00429e-06	0	161.526
90.5	21.5	1.00429e-06	0	522.301
91	21.5	1.00429e-06	0	571.547
91.5	21.5	1.00429e-06	0.849553	0
92	21.5	1.00429e-06	0.849553	1475.37
92.5	21.5	1.00429e-06	0.970632	453.478
93	21.5	9.51626e-07	0.970632	20.8879
93.5	21.5	9.51626e-07	0.970632	8.77159
94	21.5	9.51626e-07	0.898764	10.1099
94.5	21.5	9.51626e-07	0.898764	44.2289
95	21.5	9.51626e-07	0.18284	95.5409
95.5	21.5	9.51626e-07	0.18284	208.565
96	21.5	1.45438e-06	0.18284	162.445
96.5	21.5	1.45438e-06	0.166328	590.947
97	21.5	1.45438e-06	0.166328	68.2831
97.5	21.5	1.45438e-06	0.129177	23.5774
98	21.5	1.45438e-06	0.129177	23.3023
98.5	21.5	1.11578e-06	0.129177	30.9423
99	21.5	1.11578e-06	0.973681	12.619
99.5	21.5	1.11578e-06	0.973681	23.2159
100	21.5	1.11578e-06	0.968371	29.9383
100.5	21.5	1.11578e-06	0.968371	64.7701
101	21.5	1.11578e-06	0.968371	103.024
101.5	21.5	9.54018e-07	0.942627	48.2235
102	21.5	9.54018e-07	0.942627	25.1767
102.5	21.5	9.54018e-07	0.953198	10.6886
103	21.5	9.54018e-07	0.953198	17.3607
103.5	21.5	9.54018e-07	0.953198	72.2603
104	21.5	9.54018e-07	0.917794	91.6301
104.5	21.5	1.99609e-06	0.917794	73.3424
105	21.5	1.99609e-06	0.768609	164.063
105.5	21.5	1.99609e-06	0.768609	213.126
106	21.5	1.99609e-06	0.768609	319.454
106.5	21.5	1.99609e-06	0.90849	118.957
107	21.5	4.03634e-06	0.90849	140.72
107.5	21.5	4.03634e-06	0.937156	50.081
108	21.5	4.03634e-06	0.937156	115.4
108.5	21.5	4.03634e-06	0.937156	265.63
109	21.5	4.03634e-06	1.14843	320.358
109.5	21.5	4.03634e-06	1.14843	295.934
110	21.5	2.51916e-06	0.734856	380.398
110.5	21.5	2.51916e-06	0.734856	545.922
111	21.5	2.51916e-06	0.734856	1026.92
111.5	21.5	2.51916e-06	1.00184	526.342
112	21.5	2.51916e-06	1.00184	570.93
112.5	21.5	3.76524e-06	0	329.068
113	21.5	3.76524e-06	0	231.091
113.5	21.5	3.76524e-06	0	151.578
114	21.5	3.76524e-06	0	47.562
114.5	21.5	3.76524e-06	0	63.822
115	21.5	3.76524e-06	0	0
115.5	21.5	1.42521e-05	0	0
116	21.5	1.42521e-05	0	0
116.5	21.5	1.42521e-05	0	0
117	21.5	1.42521e-05	0	0
117.5	21.5	1.42521e-05	0	0
118	21.5	1.42521e-05	0	0
118.5	21.5	3.51469e-05	0	0
119	21.5	3.51469e-05	0	0
119.5	21.5	3.51469e-05	0	0
120	21.5	3.51469e-05	0	0
120.5	21.5	3.51469e-05	0	0
121	21.5	3.82857e-05	0	153.333
121.5	21.5	3.82857e-05	0	0
122	21.5	3.82857e-05	0	47.8162
122.5	21.5	3.82857e-05	0	0
123	21.5	3.82857e-05	0	0
123.5	21.5	3.82857e-05	0	0
124	21.5	5.42465e-05	0	0
124.5	21.5	5.42465e-05	0	0
125	21.5	5.42465e-05	0	0
125.5	21.5	5.42465e-05	0	0
126	21.5	5.42465e-05	0	0
126.5	21.5	5.42465e-05	0	0
127	21.5	3.16632e-05	0	0
127.5	21.5	3.16632e-05	0	0
128	21.5	3.16632e-05	0	0
128.5	21.5	3.16632e-05	0	0
129	21.5	3.16632e-05	0	0
129.5	21.5	3.21487e-05	0	0
130	21.5	3.21487e-05	0	0
130.5	21.5	3.21487e-05	0	0
131	21.5	3.21487e-05	0	0
131.5	21.5	3.21487e-05	0	0
132	21.5	3.21487e-05	0	0
132.5	21.5	1.8641e-05	0	0
133	21.5	1.8641e-05	0	0
133.5	21.5	1.8641e-05	0	0
134	21.5	1.8641e-05	0	0
134.5	21.5	1.8641e-05	0	0
135	21.5	1.69152e-05	0	0
73	22	1.28331e-06	0.323261	583.455
73.5	22	5.94739e-06	0.323261	1132.37
74	22	5.94739e-06	0.229405	352.627
74.5	22	5.94739e-06	0.229405	291.127
75	22	5.94739e-06	0.218504	294.145
75.5	22	5.94739e-06	0.218504	361.415
76	22	2.4475e-06	0.218504	310.544
76.5	22	2.4475e-06	0.201808	214.236
77	22	2.4475e-06	0.201808	138.317
77.5	22	2.4475e-06	0.19965	181.39
78	22	2.4475e-06	0.19965	160.767
78.5	22	2.4475e-06	0.19965	206.753
79	22	3.01843e-06	0.208833	244.801
79.5	22	3.01843e-06	0.208833	203.509
80	22	3.01843e-06	0.295613	210.534
80.5	22	3.01843e-06	0.295613	150.488
81	22	3.01843e-06	0.295613	131.567
81.5	22	3.01843e-06	0.191068	217.784
82	22	3.99633e-06	0.191068	297.096
82.5	22	3.99633e-06	0.198911	532.131
83	22	3.99633e-06	0.198911	355.448
83.5	22	3.99633e-06	0.198911	175.343
84	22	3.99633e-06	0.306719	178.329
84.5	22	1.48554e-06	0.306719	203.484
85	22	1.48554e-06	0.231859	457.345
85.5	22	1.48554e-06	0.231859	193.515
86	22	1.48554e-06	0.231859	289.659
86.5	22	1.48554e-06	0.221978	279.823
87	22	1.48554e-06	0.221978	378.213
87.5	22	8.11009e-07	0.315616	830.283
88	22	8.11009e-07	0.315616	1575.39
88.5	22	8.11009e-07	0.315616	3065.23
89	22	8.11009e-07	0	1117.74
89.5	22	8.11009e-07	0	317.617
90	22	1.00429e-06	0	340.156
90.5	22	1.00429e-06	0	749.168
91	22	1.00429e-06	0	813.867
91.5	22	1.00429e-06	0.849553	922.967
92	22	1.00429e-06	0.849553	3912.53
92.5	22	1.00429e-06	0.970632	504.779
93	22	9.51626e-07	0.970632	50.3133
93.5	22	9.51626e-07	0.970632	20.7245
94	22	9.51626e-07	0.898764	10.8575
94.5	22	9.51626e-07	0.898764	44.4526
95	22	9.51626e-07	0.18284	82.76
95.5	22	9.51626e-07	0.18284	223.276
96	22	1.45438e-06	0.18284	174.063
96.5	22	1.45438e-06	0.166328	232.429
97	22	1.45438e-06	0.166328	57.3039
97.5	22	1.45438e-06	0.129177	38.3231
98	22	1.45438e-06	0.129177	33.8385
98.5	22	1.11578e-06	0.129177	33.0702
99	22	1.11578e-06	0.973681	19.6328
99.5	22	1.11578e-06	0.973681	45.6
100	22	1.11578e-06	0.968371	51.3042
100.5	22	1.11578e-06	0.968371	62.1521
101	22	1.11578e-06	0.968371	93.29
101.5	22	9.54018e-07	0.942627	24.9656
102	22	9.54018e-07	0.942627	17.5356
102.5	22	9.54018e-07	0.953198	14.9247
103	22	9.54018e-07	0.953198	27.469
103.5	22	9.54018e-07	0.953198	84.9482
104	22	9.54018e-07	0.917794	114.991
104.5	22	1.99609e-06	0.917794	102.936
105	22	1.99609e-06	0.768609	117.528
105.5	22	1.99609e-06	0.768609	90.9282
106	22	1.99609e-06	0.768609	74.0167
106.5	22	1.99609e-06	0.90849	51.5592
107	22	4.03634e-06	0.90849	119.841
107.5	22	4.03634e-06	0.937156	128.105
108	22	4.03634e-06	0.937156	123.025
108.5	22	4.03634e-06	0.937156	116.652
109	22	4.03634e-06	1.14843	302.372
109.5	22	4.03634e-06	1.14843	379.521
110	22	2.51916e-06	0.734856	360.85
110.5	22	2.51916e-06	0.734856	426.122
111	22	2.51916e-06	0.734856	425.933
111.5	22	2.51916e-06	1.00184	230.562
112	22	2.51916e-06	1.00184	267.848
112.5	22	3.76524e-06	0	265.442
113	22	3.76524e-06	0	531.25
113.5	22	3.76524e-06	0	990.235
114	22	3.76524e-06	0	4285.56
114.5	22	3.76524e-06	0	8169.03
115	22	3.76524e-06	0	235.235
115.5	22	1.42521e-05	0	0
116	22	1.42521e-05	0	0
116.5	22	1.42521e-05	0	0
117	22	1.42521e-05	0	0
117.5	22	1.42521e-05	0	0
118	22	1.42521e-05	0	0
118.5	22	3.51469e-05	0	0
119	22	3.51469e-05	0	0
119.5	22	3.51469e-05	0	0
120	22	3.51469e-05	0	0
120.5	22	3.51469e-05	0	1507.93
121	22	3.82857e-05	0	78.9235
121.5	22	3.82857e-05	0	47.8162
122	22	3.82857e-05	0	47.8162
122.5	22	3.82857e-05	0	0
123	22	3.82857e-05	0	0
123.5	22	3.82857e-05	0	0
124	22	5.42465e-05	0	0
124.5	22	5.42465e-05	0	0
125	22	5.42465e-05	0	0
125.5	22	5.42465e-05	0	0
126	22	5.42465e-05	0	0
126.5	22	5.42465e-05	0	0
127	22	3.16632e-05	0	0
127.5	22	3.16632e-05	0	0
128	22	3.16632e-05	0	0
128.5	22	3.16632e-05	0	0
129	22	3.16632e-05	0	0
129.5	22	3.21487e-05	0	0
130	22	3.21487e-05	0	0
130.5	22	3.21487e-05	0	0
131	22	3.21487e-05	0	0
131.5	22	3.21487e-05	0	0
132	22	3.21487e-05	0	0
132.5	22	1.8641e-05	0	0
133	22	1.8641e-05	0	0
133.5	22	1.8641e-05	0	0
134	22	1.8641e-05	0	0
134.5	22	1.8641e-05	0	0
135	22	1.69152e-05	0	0
73	22.5	1.28331e-06	0.184783	1747.26
73.5	22.5	5.94739e-06	0.184783	654.774
74	22.5	5.94739e-06	0.180375	604.635
74.5	22.5	5.94739e-06	0.180375	649.711
75	22.5	5.94739e-06	0.219206	344.805
75.5	22.5	5.94739e-06	0.219206	313.008
76	22.5	2.4475e-06	0.219206	893.123
76.5	22.5	2.4475e-06	0.224747	759.77
77	22.5	2.4475e-06	0.224747	210.746
77.5	22.5	2.4475e-06	0.188949	182.798
78	22.5	2.4475e-06	0.188949	245.713
78.5	22.5	2.4475e-06	0.188949	197.212
79	22.5	3.01843e-06	0.232626	232.447
79.5	22.5	3.01843e-06	0.232626	177.23
80	22.5	3.01843e-06	0.259984	350.941
80.5	22.5	3.01843e-06	0.259984	170.568
81	22.5	3.01843e-06	0.259984	129.244
81.5	22.5	3.01843e-06	0.178243	82.4005
82	22.5	3.99633e-06	0.178243	173.973
82.5	22.5	3.99633e-06	0.186796	150.469
83	22.5	3.99633e-06	0.186796	161.134
83.5	22.5	3.99633e-06	0.186796	181.582
84	22.5	3.99633e-06	0.174545	182.435
84.5	22.5	1.48554e-06	0.174545	177.605
85	22.5	1.48554e-06	0.249232	197.512
85.5	22.5	1.48554e-06	0.249232	194.844
86	22.5	1.48554e-06	0.249232	375.003
86.5	22.5	1.48554e-06	0.230292	932.427
87	22.5	1.48554e-06	0.230292	413.556
87.5	22.5	8.11009e-07	0.278704	544.735
88	22.5	8.11009e-07	0.278704	1102.34
88.5	22.5	8.11009e-07	0.278704	5940.98
89	22.5	8.11009e-07	0.660582	1533.99
89.5	22.5	8.11009e-07	0.660582	998.065
90	22.5	1.00429e-06	0.819637	1028.63
90.5	22.5	1.00429e-06	0.819637	1056.61
91	22.5	1.00429e-06	0.819637	1405.09
91.5	22.5	1.00429e-06	0.534374	1425.6
92	22.5	1.00429e-06	0.534374	825.337
92.5	22.5	1.00429e-06	0.905581	234.977
93	22.5	9.51626e-07	0.905581	56.9253
93.5	22.5	9.51626e-07	0.905581	20.2361
94	22.5	9.51626e-07	0.160253	13.5755
94.5	22.5	9.51626e-07	0.160253	60.8187
95	22.5	9.51626e-07	0.133497	49.3866
95.5	22.5	9.51626e-07	0.133497	97.5739
96	22.5	1.45438e-06	0.133497	151.992
96.5	22.5	1.45438e-06	0.189522	85.4031
97	22.5	1.45438e-06	0.189522	49.5646
97.5	22.5	1.45438e-06	0.0877249	42.4018
98	22.5	1.45438e-06	0.0877249	62.6624
98.5	22.5	1.11578e-06	0.0877249	44.494
99	22.5	1.11578e-06	1.03022	58.5933
99.5	22.5	1.11578e-06	1.03022	69.3885
100	22.5	1.11578e-06	0.12344	84.3819
100.5	22.5	1.11578e-06	0.12344	43.1085
101	22.5	1.11578e-06	0.12344	86.2464
101.5	22.5	9.54018e-07	0.9881	44.7802
102	22.5	9.54018e-07	0.9881	39.2769
102.5	22.5	9.54018e-07	0.997911	52.6601
103	22.5	9.54018e-07	0.997911	81.3249
103.5	22.5	9.54018e-07	0.997911	137.953
104	22.5	9.54018e-07	0.892917	76.764
104.5	22.5	1.99609e-06	0.892917	123.453
105	22.5	1.99609e-06	0.778794	102.265
105.5	22.5	1.99609e-06	0.778794	82.4595
106	22.5	1.99609e-06	0.778794	58.2365
106.5	22.5	1.99609e-06	0.84166	108.651
107	22.5	4.03634e-06	0.84166	90.3544
107.5	22.5	4.03634e-06	0.745134	97.0279
108	22.5	4.03634e-06	0.745134	143.674
108.5	22.5	4.03634e-06	0.745134	1127.77
109	22.5	4.03634e-06	0.658896	206.437
109.5	22.5	4.03634e-06	0.658896	324.85
110	22.5	2.51916e-06	0.695294	390.925
110.5	22.5	2.51916e-06	0.695294	714.402
111	22.5	2.51916e-06	0.695294	302.104
111.5	22.5	2.51916e-06	0.709419	279.511
112	22.5	2.51916e-06	0.709419	378.158
112.5	22.5	3.76524e-06	0.756287	355.126
113	22.5	3.76524e-06	0.756287	686.787
113.5	22.5	3.76524e-06	0.756287	3436.42
114	22.5	3.76524e-06	1.02754	5214.66
114.5	22.5	3.76524e-06	1.02754	4379.86
115	22.5	3.76524e-06	0.972635	639.88
115.5	22.5	1.42521e-05	0.972635	913.302
116	22.5	1.42521e-05	0.972635	1134.95
116.5	22.5	1.42521e-05	0	1472.71
117	22.5	1.42521e-05	0	1348.04
117.5	22.5	1.42521e-05	0	0
118	22.5	1.42521e-05	0	0
118.5	22.5	3.51469e-05	0	0
119	22.5	3.51469e-05	0	0
119.5	22.5	3.51469e-05	0	0
120	22.5	3.51469e-05	1.02865	0
120.5	22.5	3.51469e-05	1.02865	2367.18
121	22.5	3.82857e-05	1.02865	138.914
121.5	22.5	3.82857e-05	0.737661	167.085
122	22.5	3.82857e-05	0.737661	100.798
122.5	22.5	3.82857e-05	0	0
123	22.5	3.82857e-05	0	0
123.5	22.5	3.82857e-05	0	0
124	22.5	5.42465e-05	0	0
124.5	22.5	5.42465e-05	0	0
125	22.5	5.42465e-05	0	0
125.5	22.5	5.42465e-05	0	0
126	22.5	5.42465e-05	0	0
126.5	22.5	5.42465e-05	0	0
127	22.5	3.16632e-05	0	0
127.5	22.5	3.16632e-05	0	0
128	22.5	3.16632e-05	0	0
128.5	22.5	3.16632e-05	0	0
129	22.5	3.16632e-05	0	0
129.5	22.5	3.21487e-05	0	0
130	22.5	3.21487e-05	0	0
130.5	22.5	3.21487e-05	0	0
131	22.5	3.21487e-05	0	0
131.5	22.5	3.21487e-05	0	0
132	22.5	3.21487e-05	0	0
132.5	22.5	1.8641e-05	0	0
133	22.5	1.8641e-05	0	0
133.5	22.5	1.8641e-05	0	0
134	22.5	1.8641e-05	0	0
134.5	22.5	1.8641e-05	0	0
135	22.5	1.69152e-05	0	0
73	23	1.28331e-06	0.184783	1829.22
73.5	23	5.94739e-06	0.184783	401.889
74	23	5.94739e-06	0.180375	446.62
74.5	23	5.94739e-06	0.180375	623.266
75	23	5.94739e-06	0.219206	346.875
75.5	23	5.94739e-06	0.219206	387.126
76	23	2.4475e-06	0.219206	469.243
76.5	23	2.4475e-06	0.224747	296.36
77	23	2.4475e-06	0.224747	326.451
77.5	23	2.4475e-06	0.188949	910.693
78	23	2.4475e-06	0.188949	378.182
78.5	23	2.4475e-06	0.188949	179.053
79	23	3.01843e-06	0.232626	198.938
79.5	23	3.01843e-06	0.232626	195.987
80	23	3.01843e-06	0.259984	477.776
80.5	23	3.01843e-06	0.259984	341.611
81	23	3.01843e-06	0.259984	323.395
81.5	23	3.01843e-06	0.178243	175.848
82	23	3.99633e-06	0.178243	268.439
82.5	23	3.99633e-06	0.186796	172.492
83	23	3.99633e-06	0.186796	223.223
83.5	23	3.99633e-06	0.186796	250.8
84	23	3.99633e-06	0.174545	126.538
84.5	23	1.48554e-06	0.174545	177.002
85	23	1.48554e-06	0.249232	393.852
85.5	23	1.48554e-06	0.249232	772.299
86	23	1.48554e-06	0.249232	407.809
86.5	23	1.48554e-06	0.230292	604.4
87	23	1.48554e-06	0.230292	530.072
87.5	23	8.11009e-07	0.278704	657.816
88	23	8.11009e-07	0.278704	769.378
88.5	23	8.11009e-07	0.278704	1573.16
89	23	8.11009e-07	0.660582	1304.07
89.5	23	8.11009e-07	0.660582	1123.24
90	23	1.00429e-06	0.819637	888.048
90.5	23	1.00429e-06	0.819637	1169.12
91	23	1.00429e-06	0.819637	1761.31
91.5	23	1.00429e-06	0.534374	1603.08
92	23	1.00429e-06	0.534374	320.66
92.5	23	1.00429e-06	0.905581	102.979
93	23	9.51626e-07	0.905581	41.9313
93.5	23	9.51626e-07	0.905581	36.5076
94	23	9.51626e-07	0.160253	32.0795
94.5	23	9.51626e-07	0.160253	77.6163
95	23	9.51626e-07	0.133497	30.9948
95.5	23	9.51626e-07	0.133497	62.0773
96	23	1.45438e-06	0.133497	69.1738
96.5	23	1.45438e-06	0.189522	38.746
97	23	1.45438e-06	0.189522	23.0109
97.5	23	1.45438e-06	0.0877249	24.7165
98	23	1.45438e-06	0.0877249	55.1573
98.5	23	1.11578e-06	0.0877249	62.6866
99	23	1.11578e-06	1.03022	49.6747
99.5	23	1.11578e-06	1.03022	73.4481
100	23	1.11578e-06	0.12344	84.3572
100.5	23	1.11578e-06	0.12344	44.3696
101	23	1.11578e-06	0.12344	46.3473
101.5	23	9.54018e-07	0.9881	50.8636
102	23	9.54018e-07	0.9881	94.82
102.5	23	9.54018e-07	0.997911	133.707
103	23	9.54018e-07	0.997911	143.073
103.5	23	9.54018e-07	0.997911	297.325
104	23	9.54018e-07	0.892917	96.1094
104.5	23	1.99609e-06	0.892917	202.782
105	23	1.99609e-06	0.778794	153.117
105.5	23	1.99609e-06	0.778794	130.483
106	23	1.99609e-06	0.778794	81.0447
106.5	23	1.99609e-06	0.84166	150.144
107	23	4.03634e-06	0.84166	133.342
107.5	23	4.03634e-06	0.745134	148.495
108	23	4.03634e-06	0.745134	181.536
108.5	23	4.03634e-06	0.745134	200.774
109	23	4.03634e-06	0.658896	312.011
109.5	23	4.03634e-06	0.658896	245.333
110	23	2.51916e-06	0.695294	486.21
110.5	23	2.51916e-06	0.695294	434.956
111	23	2.51916e-06	0.695294	283.808
111.5	23	2.51916e-06	0.709419	347.878
112	23	2.51916e-06	0.709419	212.688
112.5	23	3.76524e-06	0.756287	421.684
113	23	3.76524e-06	0.756287	780.093
113.5	23	3.76524e-06	0.756287	5590.94
114	23	3.76524e-06	1.02754	1977.87
114.5	23	3.76524e-06	1.02754	1140.74
115	23	3.76524e-06	0.972635	292.073
115.5	23	1.42521e-05	0.972635	183.617
116	23	1.42521e-05	0.972635	427.401
116.5	23	1.42521e-05	0	1939.42
117	23	1.42521e-05	0	3671.3
117.5	23	1.42521e-05	0	451.283
118	23	1.42521e-05	0	0
118.5	23	3.51469e-05	0	0
119	23	3.51469e-05	0	0
119.5	23	3.51469e-05	0	177.732
120	23	3.51469e-05	1.02865	331.734
120.5	23	3.51469e-05	1.02865	760.26
121	23	3.82857e-05	1.02865	45.4261
121.5	23	3.82857e-05	0.737661	30.2617
122	23	3.82857e-05	0.737661	28.2121
122.5	23	3.82857e-05	0	0
123	23	3.82857e-05	0	0
123.5	23	3.82857e-05	0	0
124	23	5.42465e-05	0	0
124.5	23	5.42465e-05	0	0
125	23	5.42465e-05	0	0
125.5	23	5.42465e-05	0	0
126	23	5.42465e-05	0	0
126.5	23	5.42465e-05	0	0
127	23	3.16632e-05	0	0
127.5	23	3.16632e-05	0	0
128	23	3.16632e-05	0	0
128.5	23	3.16632e-05	0	0
129	23	3.16632e-05	0	0
129.5	23	3.21487e-05	0	0
130	23	3.21487e-05	0	0
130.5	23	3.21487e-05	0	0
131	23	3.21487e-05	0	0
131.5	23	3.21487e-05	0	0
132	23	3.21487e-05	0	0
132.5	23	1.8641e-05	0	0
133	23	1.8641e-05	0	0
133.5	23	1.8641e-05	0	0
134	23	1.8641e-05	0	0
134.5	23	1.8641e-05	0	0
135	23	1.69152e-05	0	0
73	23.5	1.28331e-06	0.135868	426.206
73.5	23.5	5.94739e-06	0.135868	396.074
74	23.5	5.94739e-06	0.179173	401.771
74.5	23.5	5.94739e-06	0.179173	447.034
75	23.5	5.94739e-06	0.207842	301.938
75.5	23.5	5.94739e-06	0.207842	305.05
76	23.5	2.4475e-06	0.207842	254.235
76.5	23.5	2.4475e-06	0.231372	254.032
77	23.5	2.4475e-06	0.231372	301.538
77.5	23.5	2.4475e-06	0.231157	287.258
78	23.5	2.4475e-06	0.231157	248.085
78.5	23.5	2.4475e-06	0.231157	236.199
79	23.5	3.01843e-06	0.228311	380.388
79.5	23.5	3.01843e-06	0.228311	261.929
80	23.5	3.01843e-06	0.266546	202.208
80.5	23.5	3.01843e-06	0.266546	319.273
81	23.5	3.01843e-06	0.266546	215.121
81.5	23.5	3.01843e-06	0.160338	176.559
82	23.5	3.99633e-06	0.160338	95.3514
82.5	23.5	3.99633e-06	0.183648	124.535
83	23.5	3.99633e-06	0.183648	161.097
83.5	23.5	3.99633e-06	0.183648	153.777
84	23.5	3.99633e-06	0.162575	176.877
84.5	23.5	1.48554e-06	0.162575	284.744
85	23.5	1.48554e-06	0.195332	302.766
85.5	23.5	1.48554e-06	0.195332	610.395
86	23.5	1.48554e-06	0.195332	610.067
86.5	23.5	1.48554e-06	0.180297	1353.2
87	23.5	1.48554e-06	0.180297	1496.03
87.5	23.5	8.11009e-07	0.239295	820.599
88	23.5	8.11009e-07	0.239295	838.938
88.5	23.5	8.11009e-07	0.239295	1303.21
89	23.5	8.11009e-07	0.317658	1018.85
89.5	23.5	8.11009e-07	0.317658	1201.91
90	23.5	1.00429e-06	0.519056	1153.21
90.5	23.5	1.00429e-06	0.519056	7711.35
91	23.5	1.00429e-06	0.519056	2559.6
91.5	23.5	1.00429e-06	0.839694	1345.71
92	23.5	1.00429e-06	0.839694	240.215
92.5	23.5	1.00429e-06	1.00063	85.3953
93	23.5	9.51626e-07	1.00063	165.852
93.5	23.5	9.51626e-07	1.00063	34.9374
94	23.5	9.51626e-07	0.267174	13.6626
94.5	23.5	9.51626e-07	0.267174	41.5412
95	23.5	9.51626e-07	0.104421	17.6097
95.5	23.5	9.51626e-07	0.104421	41.9752
96	23.5	1.45438e-06	0.104421	65.9275
96.5	23.5	1.45438e-06	0.9568	62.7716
97	23.5	1.45438e-06	0.9568	16.1455
97.5	23.5	1.45438e-06	0.131147	25.3808
98	23.5	1.45438e-06	0.131147	108.115
98.5	23.5	1.11578e-06	0.131147	45.5116
99	23.5	1.11578e-06	0.135181	85.532
99.5	23.5	1.11578e-06	0.135181	106.404
100	23.5	1.11578e-06	0.166581	69.0848
100.5	23.5	1.11578e-06	0.166581	112.22
101	23.5	1.11578e-06	0.166581	50.4804
101.5	23.5	9.54018e-07	0.159758	47.7111
102	23.5	9.54018e-07	0.159758	77.119
102.5	23.5	9.54018e-07	0.194729	98.7951
103	23.5	9.54018e-07	0.194729	192.423
103.5	23.5	9.54018e-07	0.194729	185.788
104	23.5	9.54018e-07	0.249006	101.418
104.5	23.5	1.99609e-06	0.249006	139.457
105	23.5	1.99609e-06	0.747854	121.469
105.5	23.5	1.99609e-06	0.747854	105.459
106	23.5	1.99609e-06	0.747854	93.7836
106.5	23.5	1.99609e-06	0.657605	76.2161
107	23.5	4.03634e-06	0.657605	162.71
107.5	23.5	4.03634e-06	0.656527	139.934
108	23.5	4.03634e-06	0.656527	146.972
108.5	23.5	4.03634e-06	0.656527	179.803
109	23.5	4.03634e-06	0.652049	170.917
109.5	23.5	4.03634e-06	0.652049	239.61
110	23.5	2.51916e-06	0.683455	154.97
110.5	23.5	2.51916e-06	0.683455	317.398
111	23.5	2.51916e-06	0.683455	171.543
111.5	23.5	2.51916e-06	0.774177	135.838
112	23.5	2.51916e-06	0.774177	190.658
112.5	23.5	3.76524e-06	0.869024	284.473
113	23.5	3.76524e-06	0.869024	310.76
113.5	23.5	3.76524e-06	0.869024	466.728
114	23.5	3.76524e-06	0.761742	258.78
114.5	23.5	3.76524e-06	0.761742	163.576
115	23.5	3.76524e-06	0.815565	385.719
115.5	23.5	1.42521e-05	0.815565	254.812
116	23.5	1.42521e-05	0.815565	333.013
116.5	23.5	1.42521e-05	0.654827	847.667
117	23.5	1.42521e-05	0.654827	1042.62
117.5	23.5	1.42521e-05	0	680.892
118	23.5	1.42521e-05	0	831.251
118.5	23.5	3.51469e-05	0	0
119	23.5	3.51469e-05	0	0
119.5	23.5	3.51469e-05	0	294.233
120	23.5	3.51469e-05	0.971932	673.988
120.5	23.5	3.51469e-05	0.971932	486.364
121	23.5	3.82857e-05	0.971932	347.994
121.5	23.5	3.82857e-05	0.638569	20.8993
122	23.5	3.82857e-05	0.638569	400.601
122.5	23.5	3.82857e-05	0	0
123	23.5	3.82857e-05	0	0
123.5	23.5	3.82857e-05	0	0
124	23.5	5.42465e-05	0	0
124.5	23.5	5.42465e-05	0	0
125	23.5	5.42465e-05	0	0
125.5	23.5	5.42465e-05	0	0
126	23.5	5.42465e-05	0	0
126.5	23.5	5.42465e-05	0	0
127	23.5	3.16632e-05	0	0
127.5	23.5	3.16632e-05	0	0
128	23.5	3.16632e-05	0	0
128.5	23.5	3.16632e-05	0	0
129	23.5	3.16632e-05	0	0
129.5	23.5	3.21487e-05	0	0
130	23.5	3.21487e-05	0	0
130.5	23.5	3.21487e-05	0	0
131	23.5	3.21487e-05	0	0
131.5	23.5	3.21487e-05	0	0
132	23.5	3.21487e-05	0	0
132.5	23.5	1.8641e-05	0	0
133	23.5	1.8641e-05	0	0
133.5	23.5	1.8641e-05	0	0
134	23.5	1.8641e-05	0	0
134.5	23.5	1.8641e-05	0	0
135	23.5	1.69152e-05	0	0
73	24	1.68838e-07	0.135868	327.949
73.5	24	5.7995e-06	0.135868	220.175
74	24	5.7995e-06	0.179173	380.199
74.5	24	5.7995e-06	0.179173	316.234
75	24	5.7995e-06	0.207842	250.909
75.5	24	5.7995e-06	0.207842	269.902
76	24	5.24604e-06	0.207842	249.685
76.5	24	5.24604e-06	0.231372	261.937
77	24	5.24604e-06	0.231372	249.606
77.5	24	5.24604e-06	0.231157	234.545
78	24	5.24604e-06	0.231157	258.683
78.5	24	5.24604e-06	0.231157	295.878
79	24	2.42925e-06	0.228311	237.837
79.5	24	2.42925e-06	0.228311	182.057
80	24	2.42925e-06	0.266546	140.929
80.5	24	2.42925e-06	0.266546	179.707
81	24	2.42925e-06	0.266546	311.269
81.5	24	2.42925e-06	0.160338	346.037
82	24	2.9654e-06	0.160338	303.411
82.5	24	2.9654e-06	0.183648	284.459
83	24	2.9654e-06	0.183648	285.794
83.5	24	2.9654e-06	0.183648	333.032
84	24	2.9654e-06	0.162575	565.849
84.5	24	3.19102e-06	0.162575	485.49
85	24	3.19102e-06	0.195332	407.189
85.5	24	3.19102e-06	0.195332	511.984
86	24	3.19102e-06	0.195332	584.284
86.5	24	3.19102e-06	0.180297	647.696
87	24	3.19102e-06	0.180297	731.012
87.5	24	6.50346e-07	0.239295	409.153
88	24	6.50346e-07	0.239295	813.527
88.5	24	6.50346e-07	0.239295	1571.24
89	24	6.50346e-07	0.317658	1349.36
89.5	24	6.50346e-07	0.317658	1108.96
90	24	2.14252e-07	0.519056	1570.73
90.5	24	2.14252e-07	0.519056	1861.31
91	24	2.14252e-07	0.519056	1681.06
91.5	24	2.14252e-07	0.839694	1135.29
92	24	2.14252e-07	0.839694	681.337
92.5	24	2.14252e-07	1.00063	408.312
93	24	5.41756e-07	1.00063	148.769
93.5	24	5.41756e-07	1.00063	32.544
94	24	5.41756e-07	0.267174	183.096
94.5	24	5.41756e-07	0.267174	60.6275
95	24	5.41756e-07	0.104421	27.5674
95.5	24	5.41756e-07	0.104421	30.0619
96	24	3.28176e-06	0.104421	39.4189
96.5	24	3.28176e-06	0.9568	67.13
97	24	3.28176e-06	0.9568	48.3054
97.5	24	3.28176e-06	0.131147	56.6116
98	24	3.28176e-06	0.131147	115.041
98.5	24	4.72438e-06	0.131147	86.5117
99	24	4.72438e-06	0.135181	118.693
99.5	24	4.72438e-06	0.135181	101.889
100	24	4.72438e-06	0.166581	102.593
100.5	24	4.72438e-06	0.166581	137.098
101	24	4.72438e-06	0.166581	81.6205
101.5	24	4.17897e-06	0.159758	64.7581
102	24	4.17897e-06	0.159758	50.3072
102.5	24	4.17897e-06	0.194729	132.762
103	24	4.17897e-06	0.194729	443.72
103.5	24	4.17897e-06	0.194729	164.867
104	24	4.17897e-06	0.249006	127.053
104.5	24	3.78337e-06	0.249006	111.289
105	24	3.78337e-06	0.747854	85.3996
105.5	24	3.78337e-06	0.747854	72.9215
106	24	3.78337e-06	0.747854	35.9875
106.5	24	3.78337e-06	0.657605	51.8039
107	24	3.27606e-06	0.657605	90.3183
107.5	24	3.27606e-06	0.656527	96.4778
108	24	3.27606e-06	0.656527	89.397
108.5	24	3.27606e-06	0.656527	112.285
109	24	3.27606e-06	0.652049	155.025
109.5	24	3.27606e-06	0.652049	733.764
110	24	1.88696e-06	0.683455	177.258
110.5	24	1.88696e-06	0.683455	122.872
111	24	1.88696e-06	0.683455	118.07
111.5	24	1.88696e-06	0.774177	209.466
112	24	1.88696e-06	0.774177	193.18
112.5	24	4.26436e-06	0.869024	125.268
113	24	4.26436e-06	0.869024	182.124
113.5	24	4.26436e-06	0.869024	191.827
114	24	4.26436e-06	0.761742	170.497
114.5	24	4.26436e-06	0.761742	179.928
115	24	4.26436e-06	0.815565	222.231
115.5	24	1.39041e-06	0.815565	321.852
116	24	1.39041e-06	0.815565	481.002
116.5	24	1.39041e-06	0.654827	318.063
117	24	1.39041e-06	0.654827	219.694
117.5	24	1.39041e-06	0	265.211
118	24	1.39041e-06	0	570.406
118.5	24	8.97469e-06	0	5757.54
119	24	8.97469e-06	0	408.994
119.5	24	8.97469e-06	0	0
120	24	8.97469e-06	0.971932	0
120.5	24	8.97469e-06	0.971932	1101.31
121	24	3.30713e-05	0.971932	1364.88
121.5	24	3.30713e-05	0.638569	8.04381
122	24	3.30713e-05	0.638569	66.5819
122.5	24	3.30713e-05	0	0
123	24	3.30713e-05	0	57.7449
123.5	24	3.30713e-05	0	57.7449
124	24	5.92793e-05	0	11.8536
124.5	24	5.92793e-05	0	194.087
125	24	5.92793e-05	0	0
125.5	24	5.92793e-05	0	0
126	24	5.92793e-05	0	0
126.5	24	5.92793e-05	0	0
127	24	5.72081e-05	0	0
127.5	24	5.72081e-05	0	0
128	24	5.72081e-05	0	0
128.5	24	5.72081e-05	0	0
129	24	5.72081e-05	0	0
129.5	24	5.82585e-05	0	0
130	24	5.82585e-05	0	0
130.5	24	5.82585e-05	0	0
131	24	5.82585e-05	0	0
131.5	24	5.82585e-05	0	50.6777
132	24	5.82585e-05	0	0
132.5	24	4.36337e-05	0	0
133	24	4.36337e-05	0	0
133.5	24	4.36337e-05	0	0
134	24	4.36337e-05	0	0
134.5	24	4.36337e-05	0	0
135	24	4.20063e-05	0	0
73	24.5	1.68838e-07	0.123298	242.708
73.5	24.5	5.7995e-06	0.123298	231.778
74	24.5	5.7995e-06	0.126302	385.219
74.5	24.5	5.7995e-06	0.126302	333.794
75	24.5	5.7995e-06	0.200283	276.417
75.5	24.5	5.7995e-06	0.200283	155.454
76	24.5	5.24604e-06	0.200283	357.797
76.5	24.5	5.24604e-06	0.231058	280.791
77	24.5	5.24604e-06	0.231058	197.897
77.5	24.5	5.24604e-06	0.184765	225.93
78	24.5	5.24604e-06	0.184765	193.567
78.5	24.5	5.24604e-06	0.184765	274.563
79	24.5	2.42925e-06	0.202508	301.614
79.5	24.5	2.42925e-06	0.202508	309.321
80	24.5	2.42925e-06	0.172764	208.729
80.5	24.5	2.42925e-06	0.172764	209.611
81	24.5	2.42925e-06	0.172764	391.503
81.5	24.5	2.42925e-06	0.229211	435.674
82	24.5	2.9654e-06	0.229211	402.535
82.5	24.5	2.9654e-06	0.17512	368.514
83	24.5	2.9654e-06	0.17512	378.5
83.5	24.5	2.9654e-06	0.17512	403.941
84	24.5	2.9654e-06	0.187752	368.347
84.5	24.5	3.19102e-06	0.187752	857.566
85	24.5	3.19102e-06	0.198374	1182.51
85.5	24.5	3.19102e-06	0.198374	1168.66
86	24.5	3.19102e-06	0.198374	837.392
86.5	24.5	3.19102e-06	0.232062	672.682
87	24.5	3.19102e-06	0.232062	713.176
87.5	24.5	6.50346e-07	0.205292	601.167
88	24.5	6.50346e-07	0.205292	1155.74
88.5	24.5	6.50346e-07	0.205292	1216.59
89	24.5	6.50346e-07	0.219629	958.9
89.5	24.5	6.50346e-07	0.219629	1221.44
90	24.5	2.14252e-07	0.348469	1272.96
90.5	24.5	2.14252e-07	0.348469	1357.02
91	24.5	2.14252e-07	0.348469	1126.94
91.5	24.5	2.14252e-07	0.596544	639.775
92	24.5	2.14252e-07	0.596544	1358.68
92.5	24.5	2.14252e-07	1.00133	976.927
93	24.5	5.41756e-07	1.00133	709.224
93.5	24.5	5.41756e-07	1.00133	169.666
94	24.5	5.41756e-07	0.0586749	531.375
94.5	24.5	5.41756e-07	0.0586749	127.278
95	24.5	5.41756e-07	0.959008	22.9939
95.5	24.5	5.41756e-07	0.959008	23.8874
96	24.5	3.28176e-06	0.959008	30.3676
96.5	24.5	3.28176e-06	0.90229	36.1945
97	24.5	3.28176e-06	0.90229	21.3941
97.5	24.5	3.28176e-06	0.209644	29.8333
98	24.5	3.28176e-06	0.209644	75.4771
98.5	24.5	4.72438e-06	0.209644	124.536
99	24.5	4.72438e-06	0.199211	157.552
99.5	24.5	4.72438e-06	0.199211	184.159
100	24.5	4.72438e-06	0.167114	142.008
100.5	24.5	4.72438e-06	0.167114	106.877
101	24.5	4.72438e-06	0.167114	85.458
101.5	24.5	4.17897e-06	0.111184	50.7158
102	24.5	4.17897e-06	0.111184	111.733
102.5	24.5	4.17897e-06	0.229234	171.357
103	24.5	4.17897e-06	0.229234	685.539
103.5	24.5	4.17897e-06	0.229234	241.417
104	24.5	4.17897e-06	0.285348	268.179
104.5	24.5	3.78337e-06	0.285348	168.763
105	24.5	3.78337e-06	0.715314	105.038
105.5	24.5	3.78337e-06	0.715314	111.65
106	24.5	3.78337e-06	0.715314	65.6874
106.5	24.5	3.78337e-06	0.635461	47.0016
107	24.5	3.27606e-06	0.635461	58.7198
107.5	24.5	3.27606e-06	0.477695	91.5398
108	24.5	3.27606e-06	0.477695	74.2366
108.5	24.5	3.27606e-06	0.477695	145.969
109	24.5	3.27606e-06	0.419592	120.544
109.5	24.5	3.27606e-06	0.419592	155.122
110	24.5	1.88696e-06	0.718668	91.5104
110.5	24.5	1.88696e-06	0.718668	155.071
111	24.5	1.88696e-06	0.718668	205.101
111.5	24.5	1.88696e-06	0.765671	170.329
112	24.5	1.88696e-06	0.765671	116.681
112.5	24.5	4.26436e-06	0.689325	182.788
113	24.5	4.26436e-06	0.689325	80.6182
113.5	24.5	4.26436e-06	0.689325	88.294
114	24.5	4.26436e-06	0.773606	361.429
114.5	24.5	4.26436e-06	0.773606	118.227
115	24.5	4.26436e-06	0.663662	198.755
115.5	24.5	1.39041e-06	0.663662	130.305
116	24.5	1.39041e-06	0.663662	185.858
116.5	24.5	1.39041e-06	0.723654	158.708
117	24.5	1.39041e-06	0.723654	142.433
117.5	24.5	1.39041e-06	0.596715	130.448
118	24.5	1.39041e-06	0.596715	647.003
118.5	24.5	8.97469e-06	0.596715	1910.83
119	24.5	8.97469e-06	1.31383	3305.79
119.5	24.5	8.97469e-06	1.31383	2954.43
120	24.5	8.97469e-06	0.982853	0
120.5	24.5	8.97469e-06	0.982853	0
121	24.5	3.30713e-05	0.982853	1155.53
121.5	24.5	3.30713e-05	0.58228	1313.43
122	24.5	3.30713e-05	0.58228	600.878
122.5	24.5	3.30713e-05	0.630222	0
123	24.5	3.30713e-05	0.630222	0
123.5	24.5	3.30713e-05	0.630222	0
124	24.5	5.92793e-05	0	0
124.5	24.5	5.92793e-05	0	208.362
125	24.5	5.92793e-05	0	53.7224
125.5	24.5	5.92793e-05	0	255.375
126	24.5	5.92793e-05	0	0
126.5	24.5	5.92793e-05	0	0
127	24.5	5.72081e-05	0	0
127.5	24.5	5.72081e-05	0	0
128	24.5	5.72081e-05	0	0
128.5	24.5	5.72081e-05	0	0
129	24.5	5.72081e-05	0	0
129.5	24.5	5.82585e-05	0	0
130	24.5	5.82585e-05	0	0
130.5	24.5	5.82585e-05	0	0
131	24.5	5.82585e-05	0	0
131.5	24.5	5.82585e-05	0	0
132	24.5	5.82585e-05	0	0
132.5	24.5	4.36337e-05	0	0
133	24.5	4.36337e-05	0	0
133.5	24.5	4.36337e-05	0	0
134	24.5	4.36337e-05	0	0
134.5	24.5	4.36337e-05	0	0
135	24.5	4.20063e-05	0	0
73	25	1.68838e-07	0.146391	191.993
73.5	25	5.7995e-06	0.146391	207.958
74	25	5.7995e-06	0.152551	241.835
74.5	25	5.7995e-06	0.152551	285.619
75	25	5.7995e-06	0.128308	330.885
75.5	25	5.7995e-06	0.128308	198.886
76	25	5.24604e-06	0.128308	433.379
76.5	25	5.24604e-06	0.227978	286.187
77	25	5.24604e-06	0.227978	176.294
77.5	25	5.24604e-06	0.192583	146.521
78	25	5.24604e-06	0.192583	197.257
78.5	25	5.24604e-06	0.192583	361.266
79	25	2.42925e-06	0.186731	430.329
79.5	25	2.42925e-06	0.186731	337.231
80	25	2.42925e-06	0.175871	337.718
80.5	25	2.42925e-06	0.175871	348.563
81	25	2.42925e-06	0.175871	397.33
81.5	25	2.42925e-06	0.207926	562.287
82	25	2.9654e-06	0.207926	1400.24
82.5	25	2.9654e-06	0.197759	1272.6
83	25	2.9654e-06	0.197759	1877.69
83.5	25	2.9654e-06	0.197759	1267.13
84	25	2.9654e-06	0.196956	987.159
84.5	25	3.19102e-06	0.196956	1269.45
85	25	3.19102e-06	0.25741	1312.79
85.5	25	3.19102e-06	0.25741	1517.43
86	25	3.19102e-06	0.25741	1488.17
86.5	25	3.19102e-06	0.317773	1383.16
87	25	3.19102e-06	0.317773	1317.98
87.5	25	6.50346e-07	0.298324	1426.57
88	25	6.50346e-07	0.298324	1122.19
88.5	25	6.50346e-07	0.298324	915.229
89	25	6.50346e-07	0.277435	846.63
89.5	25	6.50346e-07	0.277435	1105.42
90	25	2.14252e-07	0.396934	1017.41
90.5	25	2.14252e-07	0.396934	467.744
91	25	2.14252e-07	0.396934	328.43
91.5	25	2.14252e-07	0.56361	402.613
92	25	2.14252e-07	0.56361	414.397
92.5	25	2.14252e-07	1.06748	282.113
93	25	5.41756e-07	1.06748	148.569
93.5	25	5.41756e-07	1.06748	50.4881
94	25	5.41756e-07	1.1265	107.315
94.5	25	5.41756e-07	1.1265	181.076
95	25	5.41756e-07	1.05674	25.2474
95.5	25	5.41756e-07	1.05674	21.5135
96	25	3.28176e-06	1.05674	21.5095
96.5	25	3.28176e-06	0.958774	44.0686
97	25	3.28176e-06	0.958774	40.5648
97.5	25	3.28176e-06	1.0455	55.9727
98	25	3.28176e-06	1.0455	27.4687
98.5	25	4.72438e-06	1.0455	77.2775
99	25	4.72438e-06	0.556934	125.228
99.5	25	4.72438e-06	0.556934	256.914
100	25	4.72438e-06	0.273246	64.8152
100.5	25	4.72438e-06	0.273246	188.267
101	25	4.72438e-06	0.273246	169.451
101.5	25	4.17897e-06	0.178091	140.091
102	25	4.17897e-06	0.178091	173.944
102.5	25	4.17897e-06	1.01294	148.965
103	25	4.17897e-06	1.01294	1111.47
103.5	25	4.17897e-06	1.01294	207.865
104	25	4.17897e-06	0.554926	381.39
104.5	25	3.78337e-06	0.554926	209.753
105	25	3.78337e-06	0.725276	289.969
105.5	25	3.78337e-06	0.725276	217.051
106	25	3.78337e-06	0.725276	135.083
106.5	25	3.78337e-06	0.593857	79.2103
107	25	3.27606e-06	0.593857	61.8583
107.5	25	3.27606e-06	0.455301	57.0559
108	25	3.27606e-06	0.455301	62.728
108.5	25	3.27606e-06	0.455301	44.2967
109	25	3.27606e-06	0.417596	50.7468
109.5	25	3.27606e-06	0.417596	142.803
110	25	1.88696e-06	0.505761	77.7841
110.5	25	1.88696e-06	0.505761	594.453
111	25	1.88696e-06	0.505761	82.5496
111.5	25	1.88696e-06	0.449001	152.313
112	25	1.88696e-06	0.449001	160.29
112.5	25	4.26436e-06	0.434798	146.954
113	25	4.26436e-06	0.434798	290.362
113.5	25	4.26436e-06	0.434798	165.036
114	25	4.26436e-06	0.510939	101.168
114.5	25	4.26436e-06	0.510939	164.425
115	25	4.26436e-06	0.642138	240.28
115.5	25	1.39041e-06	0.642138	182.688
116	25	1.39041e-06	0.642138	112.195
116.5	25	1.39041e-06	0.679361	132.369
117	25	1.39041e-06	0.679361	111.834
117.5	25	1.39041e-06	0.559399	216.952
118	25	1.39041e-06	0.559399	179.663
118.5	25	8.97469e-06	0.559399	599.254
119	25	8.97469e-06	0.761914	883.799
119.5	25	8.97469e-06	0.761914	1566.44
120	25	8.97469e-06	0.848676	984.343
120.5	25	8.97469e-06	0.848676	0
121	25	3.30713e-05	0.848676	0
121.5	25	3.30713e-05	0.542049	4622.4
122	25	3.30713e-05	0.542049	3369.57
122.5	25	3.30713e-05	0.516054	183.576
123	25	3.30713e-05	0.516054	0
123.5	25	3.30713e-05	0.516054	0
124	25	5.92793e-05	0	0
124.5	25	5.92793e-05	0	0
125	25	5.92793e-05	0	0
125.5	25	5.92793e-05	0	0
126	25	5.92793e-05	0	0
126.5	25	5.92793e-05	0	0
127	25	5.72081e-05	0	0
127.5	25	5.72081e-05	0	0
128	25	5.72081e-05	0	0
128.5	25	5.72081e-05	0	0
129	25	5.72081e-05	0	0
129.5	25	5.82585e-05	0	0
130	25	5.82585e-05	0	0
130.5	25	5.82585e-05	0	0
131	25	5.82585e-05	0	0
131.5	25	5.82585e-05	0	0
132	25	5.82585e-05	0	0
132.5	25	4.36337e-05	0	0
133	25	4.36337e-05	0	0
133.5	25	4.36337e-05	0	0
134	25	4.36337e-05	0	0
134.5	25	4.36337e-05	0	0
135	25	4.20063e-05	0	0
73	25.5	1.68838e-07	0.146391	156.858
73.5	25.5	5.7995e-06	0.146391	163.015
74	25.5	5.7995e-06	0.152551	184.773
74.5	25.5	5.7995e-06	0.152551	275.27
75	25.5	5.7995e-06	0.128308	227.221
75.5	25.5	5.7995e-06	0.128308	222.583
76	25.5	5.24604e-06	0.128308	200.465
76.5	25.5	5.24604e-06	0.227978	264.513
77	25.5	5.24604e-06	0.227978	180.406
77.5	25.5	5.24604e-06	0.192583	107.617
78	25.5	5.24604e-06	0.192583	296.986
78.5	25.5	5.24604e-06	0.192583	323.911
79	25.5	2.42925e-06	0.186731	369.92
79.5	25.5	2.42925e-06	0.186731	333.282
80	25.5	2.42925e-06	0.175871	305.012
80.5	25.5	2.42925e-06	0.175871	427.931
81	25.5	2.42925e-06	0.175871	639.787
81.5	25.5	2.42925e-06	0.207926	869.304
82	25.5	2.9654e-06	0.207926	1170.29
82.5	25.5	2.9654e-06	0.197759	1142.92
83	25.5	2.9654e-06	0.197759	1253.54
83.5	25.5	2.9654e-06	0.197759	1293.91
84	25.5	2.9654e-06	0.196956	1304.55
84.5	25.5	3.19102e-06	0.196956	1251.08
85	25.5	3.19102e-06	0.25741	1743.89
85.5	25.5	3.19102e-06	0.25741	2920.42
86	25.5	3.19102e-06	0.25741	2028.85
86.5	25.5	3.19102e-06	0.317773	1804.49
87	25.5	3.19102e-06	0.317773	1406.73
87.5	25.5	6.50346e-07	0.298324	1206.97
88	25.5	6.50346e-07	0.298324	1388.29
88.5	25.5	6.50346e-07	0.298324	1026.06
89	25.5	6.50346e-07	0.277435	1110.6
89.5	25.5	6.50346e-07	0.277435	1396.49
90	25.5	2.14252e-07	0.396934	1074.82
90.5	25.5	2.14252e-07	0.396934	276.871
91	25.5	2.14252e-07	0.396934	173.416
91.5	25.5	2.14252e-07	0.56361	166.894
92	25.5	2.14252e-07	0.56361	319.77
92.5	25.5	2.14252e-07	1.06748	166.646
93	25.5	5.41756e-07	1.06748	199.352
93.5	25.5	5.41756e-07	1.06748	211.908
94	25.5	5.41756e-07	1.1265	250.632
94.5	25.5	5.41756e-07	1.1265	179.977
95	25.5	5.41756e-07	1.05674	41.8613
95.5	25.5	5.41756e-07	1.05674	7.39379
96	25.5	3.28176e-06	1.05674	6.98499
96.5	25.5	3.28176e-06	0.958774	51.7257
97	25.5	3.28176e-06	0.958774	50.4232
97.5	25.5	3.28176e-06	1.0455	65.5889
98	25.5	3.28176e-06	1.0455	10.6468
98.5	25.5	4.72438e-06	1.0455	14.546
99	25.5	4.72438e-06	0.556934	69.3686
99.5	25.5	4.72438e-06	0.556934	55.8599
100	25.5	4.72438e-06	0.273246	52.3821
100.5	25.5	4.72438e-06	0.273246	321.437
101	25.5	4.72438e-06	0.273246	161.764
101.5	25.5	4.17897e-06	0.178091	115.103
102	25.5	4.17897e-06	0.178091	101.412
102.5	25.5	4.17897e-06	1.01294	97.0548
103	25.5	4.17897e-06	1.01294	118.917
103.5	25.5	4.17897e-06	1.01294	127.685
104	25.5	4.17897e-06	0.554926	210.151
104.5	25.5	3.78337e-06	0.554926	246.936
105	25.5	3.78337e-06	0.725276	263.406
105.5	25.5	3.78337e-06	0.725276	179.88
106	25.5	3.78337e-06	0.725276	160.51
106.5	25.5	3.78337e-06	0.593857	117.778
107	25.5	3.27606e-06	0.593857	87.5581
107.5	25.5	3.27606e-06	0.455301	72.1082
108	25.5	3.27606e-06	0.455301	116.95
108.5	25.5	3.27606e-06	0.455301	54.0949
109	25.5	3.27606e-06	0.417596	94.6751
109.5	25.5	3.27606e-06	0.417596	126.168
110	25.5	1.88696e-06	0.505761	88.4515
110.5	25.5	1.88696e-06	0.505761	63.4055
111	25.5	1.88696e-06	0.505761	173.161
111.5	25.5	1.88696e-06	0.449001	178.776
112	25.5	1.88696e-06	0.449001	256.471
112.5	25.5	4.26436e-06	0.434798	349.867
113	25.5	4.26436e-06	0.434798	276.759
113.5	25.5	4.26436e-06	0.434798	342.168
114	25.5	4.26436e-06	0.510939	128.311
114.5	25.5	4.26436e-06	0.510939	115.395
115	25.5	4.26436e-06	0.642138	659.152
115.5	25.5	1.39041e-06	0.642138	273.241
116	25.5	1.39041e-06	0.642138	237.836
116.5	25.5	1.39041e-06	0.679361	234.539
117	25.5	1.39041e-06	0.679361	90.172
117.5	25.5	1.39041e-06	0.559399	91.357
118	25.5	1.39041e-06	0.559399	110.569
118.5	25.5	8.97469e-06	0.559399	79.4306
119	25.5	8.97469e-06	0.761914	114.537
119.5	25.5	8.97469e-06	0.761914	646.014
120	25.5	8.97469e-06	0.848676	1169.65
120.5	25.5	8.97469e-06	0.848676	0
121	25.5	3.30713e-05	0.848676	0
121.5	25.5	3.30713e-05	0.542049	0
122	25.5	3.30713e-05	0.542049	0
122.5	25.5	3.30713e-05	0.516054	451.721
123	25.5	3.30713e-05	0.516054	0
123.5	25.5	3.30713e-05	0.516054	208.362
124	25.5	5.92793e-05	0	208.362
124.5	25.5	5.92793e-05	0	0
125	25.5	5.92793e-05	0	208.362
125.5	25.5	5.92793e-05	0	0
126	25.5	5.92793e-05	0	0
126.5	25.5	5.92793e-05	0	0
127	25.5	5.72081e-05	0	0
127.5	25.5	5.72081e-05	0	0
128	25.5	5.72081e-05	0	1161.1
128.5	25.5	5.72081e-05	0	0
129	25.5	5.72081e-05	0	0
129.5	25.5	5.82585e-05	0	0
130	25.5	5.82585e-05	0	0
130.5	25.5	5.82585e-05	0	0
131	25.5	5.82585e-05	0	0
131.5	25.5	5.82585e-05	0	48.4076
132	25.5	5.82585e-05	0	0
132.5	25.5	4.36337e-05	0	0
133	25.5	4.36337e-05	0	0
133.5	25.5	4.36337e-05	0	0
134	25.5	4.36337e-05	0	0
134.5	25.5	4.36337e-05	0	0
135	25.5	4.20063e-05	0	0
73	26	1.68838e-07	0.303399	348.765
73.5	26	5.7995e-06	0.303399	462.327
74	26	5.7995e-06	0.143096	188.99
74.5	26	5.7995e-06	0.143096	263.561
75	26	5.7995e-06	0.151309	352.22
75.5	26	5.7995e-06	0.151309	207.63
76	26	5.24604e-06	0.151309	271.116
76.5	26	5.24604e-06	0.160705	269.46
77	26	5.24604e-06	0.160705	243.91
77.5	26	5.24604e-06	0.158562	242.669
78	26	5.24604e-06	0.158562	427.866
78.5	26	5.24604e-06	0.158562	558.706
79	26	2.42925e-06	0.162058	385.703
79.5	26	2.42925e-06	0.162058	466.122
80	26	2.42925e-06	0.211743	546.692
80.5	26	2.42925e-06	0.211743	1570.68
81	26	2.42925e-06	0.211743	859.266
81.5	26	2.42925e-06	0.18535	900.716
82	26	2.9654e-06	0.18535	981.412
82.5	26	2.9654e-06	0.221612	1029.62
83	26	2.9654e-06	0.221612	1159.47
83.5	26	2.9654e-06	0.221612	1279.8
84	26	2.9654e-06	0.221239	1213.3
84.5	26	3.19102e-06	0.221239	1707.72
85	26	3.19102e-06	0.305818	1616.54
85.5	26	3.19102e-06	0.305818	2073.34
86	26	3.19102e-06	0.305818	1925.75
86.5	26	3.19102e-06	0.40966	1732.99
87	26	3.19102e-06	0.40966	1164.05
87.5	26	6.50346e-07	0.551625	1368.85
88	26	6.50346e-07	0.551625	1088.12
88.5	26	6.50346e-07	0.551625	864.903
89	26	6.50346e-07	0.336616	1003.54
89.5	26	6.50346e-07	0.336616	1043.46
90	26	2.14252e-07	0.599973	793.483
90.5	26	2.14252e-07	0.599973	672.419
91	26	2.14252e-07	0.599973	783.007
91.5	26	2.14252e-07	0.701427	834.738
92	26	2.14252e-07	0.701427	938.106
92.5	26	2.14252e-07	0.89894	642.481
93	26	5.41756e-07	0.89894	816.531
93.5	26	5.41756e-07	0.89894	126.832
94	26	5.41756e-07	0.959379	175.168
94.5	26	5.41756e-07	0.959379	194.93
95	26	5.41756e-07	0.0810524	113.842
95.5	26	5.41756e-07	0.0810524	26.8229
96	26	3.28176e-06	0.0810524	8.2879
96.5	26	3.28176e-06	1.02317	10.9342
97	26	3.28176e-06	1.02317	10.9973
97.5	26	3.28176e-06	1.2141	15.7453
98	26	3.28176e-06	1.2141	0.874378
98.5	26	4.72438e-06	1.2141	2.09227
99	26	4.72438e-06	1.02595	28.0197
99.5	26	4.72438e-06	1.02595	51.757
100	26	4.72438e-06	0.821681	78.2354
100.5	26	4.72438e-06	0.821681	104.215
101	26	4.72438e-06	0.821681	73.2772
101.5	26	4.17897e-06	0.251876	40.7626
102	26	4.17897e-06	0.251876	90.486
102.5	26	4.17897e-06	0.239735	89.2145
103	26	4.17897e-06	0.239735	77.3481
103.5	26	4.17897e-06	0.239735	189.357
104	26	4.17897e-06	0.420484	140.562
104.5	26	3.78337e-06	0.420484	295.312
105	26	3.78337e-06	0.642454	192.301
105.5	26	3.78337e-06	0.642454	240.681
106	26	3.78337e-06	0.642454	421.836
106.5	26	3.78337e-06	0.594152	233.688
107	26	3.27606e-06	0.594152	271.26
107.5	26	3.27606e-06	0.408626	111.287
108	26	3.27606e-06	0.408626	175.969
108.5	26	3.27606e-06	0.408626	73.1907
109	26	3.27606e-06	0.421033	68.0072
109.5	26	3.27606e-06	0.421033	82.4244
110	26	1.88696e-06	0.4181	85.3344
110.5	26	1.88696e-06	0.4181	68.4037
111	26	1.88696e-06	0.4181	121.421
111.5	26	1.88696e-06	0.389859	212.185
112	26	1.88696e-06	0.389859	317.626
112.5	26	4.26436e-06	0.34622	280.079
113	26	4.26436e-06	0.34622	466.225
113.5	26	4.26436e-06	0.34622	243.162
114	26	4.26436e-06	0.391718	99.1152
114.5	26	4.26436e-06	0.391718	138.971
115	26	4.26436e-06	0.43596	220.978
115.5	26	1.39041e-06	0.43596	314.395
116	26	1.39041e-06	0.43596	279.617
116.5	26	1.39041e-06	0.516964	226.195
117	26	1.39041e-06	0.516964	104.358
117.5	26	1.39041e-06	0.494305	76.9751
118	26	1.39041e-06	0.494305	219.504
118.5	26	8.97469e-06	0.494305	105.405
119	26	8.97469e-06	0.447072	137.187
119.5	26	8.97469e-06	0.447072	1320.93
120	26	8.97469e-06	0.664455	797.476
120.5	26	8.97469e-06	0.664455	363.147
121	26	3.30713e-05	0.664455	464.021
121.5	26	3.30713e-05	0	0
122	26	3.30713e-05	0	0
122.5	26	3.30713e-05	0	0
123	26	3.30713e-05	0	0
123.5	26	3.30713e-05	0	0
124	26	5.92793e-05	0	0
124.5	26	5.92793e-05	0	0
125	26	5.92793e-05	0	0
125.5	26	5.92793e-05	0	0
126	26	5.92793e-05	0	0
126.5	26	5.92793e-05	0	0
127	26	5.72081e-05	0	133.44
127.5	26	5.72081e-05	0	45.5342
128	26	5.72081e-05	0	2085.71
128.5	26	5.72081e-05	0	831.34
129	26	5.72081e-05	0	0
129.5	26	5.82585e-05	0	26.9593
130	26	5.82585e-05	0	0
130.5	26	5.82585e-05	0	0
131	26	5.82585e-05	0	0
131.5	26	5.82585e-05	0	0
132	26	5.82585e-05	0	0
132.5	26	4.36337e-05	0	0
133	26	4.36337e-05	0	0
133.5	26	4.36337e-05	0	0
134	26	4.36337e-05	0	0
134.5	26	4.36337e-05	0	0
135	26	4.20063e-05	0	0
73	26.5	1.68838e-07	0.303399	137.841
73.5	26.5	5.7995e-06	0.303399	167.53
74	26.5	5.7995e-06	0.143096	209.871
74.5	26.5	5.7995e-06	0.143096	186.168
75	26.5	5.7995e-06	0.151309	402.987
75.5	26.5	5.7995e-06	0.151309	345.362
76	26.5	5.24604e-06	0.151309	1489.2
76.5	26.5	5.24604e-06	0.160705	488.501
77	26.5	5.24604e-06	0.160705	512.704
77.5	26.5	5.24604e-06	0.158562	482.56
78	26.5	5.24604e-06	0.158562	595.924
78.5	26.5	5.24604e-06	0.158562	615.836
79	26.5	2.42925e-06	0.162058	690.357
79.5	26.5	2.42925e-06	0.162058	789.33
80	26.5	2.42925e-06	0.211743	679.221
80.5	26.5	2.42925e-06	0.211743	866.981
81	26.5	2.42925e-06	0.211743	1916.04
81.5	26.5	2.42925e-06	0.18535	1170.8
82	26.5	2.9654e-06	0.18535	958.469
82.5	26.5	2.9654e-06	0.221612	1072.11
83	26.5	2.9654e-06	0.221612	1141.93
83.5	26.5	2.9654e-06	0.221612	1520.67
84	26.5	2.9654e-06	0.221239	1476.64
84.5	26.5	3.19102e-06	0.221239	1344.49
85	26.5	3.19102e-06	0.305818	1528.25
85.5	26.5	3.19102e-06	0.305818	1501.88
86	26.5	3.19102e-06	0.305818	1217.31
86.5	26.5	3.19102e-06	0.40966	886.339
87	26.5	3.19102e-06	0.40966	316.946
87.5	26.5	6.50346e-07	0.551625	1611.25
88	26.5	6.50346e-07	0.551625	346.87
88.5	26.5	6.50346e-07	0.551625	636.31
89	26.5	6.50346e-07	0.336616	687.896
89.5	26.5	6.50346e-07	0.336616	485.424
90	26.5	2.14252e-07	0.599973	192.033
90.5	26.5	2.14252e-07	0.599973	212.504
91	26.5	2.14252e-07	0.599973	225.448
91.5	26.5	2.14252e-07	0.701427	334.218
92	26.5	2.14252e-07	0.701427	353.667
92.5	26.5	2.14252e-07	0.89894	484.219
93	26.5	5.41756e-07	0.89894	450.243
93.5	26.5	5.41756e-07	0.89894	302.369
94	26.5	5.41756e-07	0.959379	325.335
94.5	26.5	5.41756e-07	0.959379	452.788
95	26.5	5.41756e-07	0.0810524	262.381
95.5	26.5	5.41756e-07	0.0810524	70.9334
96	26.5	3.28176e-06	0.0810524	15.9891
96.5	26.5	3.28176e-06	1.02317	2.8046
97	26.5	3.28176e-06	1.02317	3.502
97.5	26.5	3.28176e-06	1.2141	5.29433
98	26.5	3.28176e-06	1.2141	3.6624
98.5	26.5	4.72438e-06	1.2141	1.85294
99	26.5	4.72438e-06	1.02595	26.5879
99.5	26.5	4.72438e-06	1.02595	45.1405
100	26.5	4.72438e-06	0.821681	48.8527
100.5	26.5	4.72438e-06	0.821681	165.19
101	26.5	4.72438e-06	0.821681	94.9105
101.5	26.5	4.17897e-06	0.251876	83.2938
102	26.5	4.17897e-06	0.251876	325.846
102.5	26.5	4.17897e-06	0.239735	145.978
103	26.5	4.17897e-06	0.239735	145.365
103.5	26.5	4.17897e-06	0.239735	158.545
104	26.5	4.17897e-06	0.420484	152.088
104.5	26.5	3.78337e-06	0.420484	255.965
105	26.5	3.78337e-06	0.642454	407.882
105.5	26.5	3.78337e-06	0.642454	279.458
106	26.5	3.78337e-06	0.642454	270.934
106.5	26.5	3.78337e-06	0.594152	302.823
107	26.5	3.27606e-06	0.594152	1231.04
107.5	26.5	3.27606e-06	0.408626	141.385
108	26.5	3.27606e-06	0.408626	218.924
108.5	26.5	3.27606e-06	0.408626	135.927
109	26.5	3.27606e-06	0.421033	81.5798
109.5	26.5	3.27606e-06	0.421033	105.081
110	26.5	1.88696e-06	0.4181	162.753
110.5	26.5	1.88696e-06	0.4181	151.37
111	26.5	1.88696e-06	0.4181	385.716
111.5	26.5	1.88696e-06	0.389859	304.825
112	26.5	1.88696e-06	0.389859	417.305
112.5	26.5	4.26436e-06	0.34622	526.279
113	26.5	4.26436e-06	0.34622	761.322
113.5	26.5	4.26436e-06	0.34622	324.689
114	26.5	4.26436e-06	0.391718	232.711
114.5	26.5	4.26436e-06	0.391718	148.601
115	26.5	4.26436e-06	0.43596	226.468
115.5	26.5	1.39041e-06	0.43596	143.771
116	26.5	1.39041e-06	0.43596	132.579
116.5	26.5	1.39041e-06	0.516964	161.736
117	26.5	1.39041e-06	0.516964	69.4495
117.5	26.5	1.39041e-06	0.494305	72.5301
118	26.5	1.39041e-06	0.494305	90.8574
118.5	26.5	8.97469e-06	0.494305	181.537
119	26.5	8.97469e-06	0.447072	114.671
119.5	26.5	8.97469e-06	0.447072	102.043
120	26.5	8.97469e-06	0.664455	365.759
120.5	26.5	8.97469e-06	0.664455	298.674
121	26.5	3.30713e-05	0.664455	97.4482
121.5	26.5	3.30713e-05	0	0
122	26.5	3.30713e-05	0	0
122.5	26.5	3.30713e-05	0	0
123	26.5	3.30713e-05	0	0
123.5	26.5	3.30713e-05	0	0
124	26.5	5.92793e-05	0	0
124.5	26.5	5.92793e-05	0	0
125	26.5	5.92793e-05	0	0
125.5	26.5	5.92793e-05	0	0
126	26.5	5.92793e-05	0	0
126.5	26.5	5.92793e-05	0	0
127	26.5	5.72081e-05	0	133.44
127.5	26.5	5.72081e-05	0	108.019
128	26.5	5.72081e-05	0	243.488
128.5	26.5	5.72081e-05	0	107.641
129	26.5	5.72081e-05	0	0
129.5	26.5	5.82585e-05	0	0
130	26.5	5.82585e-05	0	0
130.5	26.5	5.82585e-05	0	0
131	26.5	5.82585e-05	0	0
131.5	26.5	5.82585e-05	0	0
132	26.5	5.82585e-05	0	0
132.5	26.5	4.36337e-05	0	0
133	26.5	4.36337e-05	0	0
133.5	26.5	4.36337e-05	0	0
134	26.5	4.36337e-05	0	0
134.5	26.5	4.36337e-05	0	0
135	26.5	4.20063e-05	0	0
73	27	5.66025e-08	0.0772801	99.6829
73.5	27	9.91489e-07	0.0772801	138.997
74	27	9.91489e-07	0.168539	188.839
74.5	27	9.91489e-07	0.168539	200.91
75	27	9.91489e-07	0.107657	292.718
75.5	27	9.91489e-07	0.107657	348.016
76	27	1.77013e-05	0.107657	634.293
76.5	27	1.77013e-05	0.174602	409.41
77	27	1.77013e-05	0.174602	549.732
77.5	27	1.77013e-05	0.148086	605.723
78	27	1.77013e-05	0.148086	1288.04
78.5	27	1.77013e-05	0.148086	1580.69
79	27	1.65094e-05	0.166211	837.606
79.5	27	1.65094e-05	0.166211	928.036
80	27	1.65094e-05	0.197279	895.458
80.5	27	1.65094e-05	0.197279	859.003
81	27	1.65094e-05	0.197279	911.936
81.5	27	1.65094e-05	0.258182	915.558
82	27	7.75159e-06	0.258182	1060.35
82.5	27	7.75159e-06	0.229709	1016.27
83	27	7.75159e-06	0.229709	1063.35
83.5	27	7.75159e-06	0.229709	1160.27
84	27	7.75159e-06	0.380569	1062.66
84.5	27	7.58021e-06	0.380569	581.509
85	27	7.58021e-06	0.539176	1032.97
85.5	27	7.58021e-06	0.539176	303.701
86	27	7.58021e-06	0.539176	145.536
86.5	27	7.58021e-06	0.386404	129.344
87	27	7.58021e-06	0.386404	112.761
87.5	27	1.06122e-06	0.251881	123.986
88	27	1.06122e-06	0.251881	125.609
88.5	27	1.06122e-06	0.251881	404.641
89	27	1.06122e-06	0.808475	182.106
89.5	27	1.06122e-06	0.808475	23.5399
90	27	8.67173e-07	0.906672	66.4956
90.5	27	8.67173e-07	0.906672	13.4222
91	27	8.67173e-07	0.906672	11.2288
91.5	27	8.67173e-07	0.862507	28.4858
92	27	8.67173e-07	0.862507	27.3906
92.5	27	8.67173e-07	0.699049	22.1832
93	27	4.37294e-07	0.699049	26.9837
93.5	27	4.37294e-07	0.699049	24.1878
94	27	4.37294e-07	0.682689	185.772
94.5	27	4.37294e-07	0.682689	311.706
95	27	4.37294e-07	0.839677	406.835
95.5	27	4.37294e-07	0.839677	474.026
96	27	1.38002e-06	0.839677	179.079
96.5	27	1.38002e-06	1.10505	21.7381
97	27	1.38002e-06	1.10505	6.05551
97.5	27	1.38002e-06	1.19366	9.96044
98	27	1.38002e-06	1.19366	4.84446
98.5	27	7.48359e-07	1.19366	2.40146
99	27	7.48359e-07	1.12362	17.1778
99.5	27	7.48359e-07	1.12362	48.9359
100	27	7.48359e-07	1.15503	31.8781
100.5	27	7.48359e-07	1.15503	28.2144
101	27	7.48359e-07	1.15503	58.8755
101.5	27	3.77525e-06	0.323931	53.3165
102	27	3.77525e-06	0.323931	57.7158
102.5	27	3.77525e-06	0.461358	119.274
103	27	3.77525e-06	0.461358	131.734
103.5	27	3.77525e-06	0.461358	194.294
104	27	3.77525e-06	0.385126	410.619
104.5	27	8.79853e-06	0.385126	194.459
105	27	8.79853e-06	0.709118	350.697
105.5	27	8.79853e-06	0.709118	395.782
106	27	8.79853e-06	0.709118	240.602
106.5	27	8.79853e-06	0.528598	263.122
107	27	5.52095e-06	0.528598	245.769
107.5	27	5.52095e-06	0.403545	160.647
108	27	5.52095e-06	0.403545	132.356
108.5	27	5.52095e-06	0.403545	92.8575
109	27	5.52095e-06	0.400171	121.891
109.5	27	5.52095e-06	0.400171	144.422
110	27	3.47994e-06	0.382154	217.515
110.5	27	3.47994e-06	0.382154	158.789
111	27	3.47994e-06	0.382154	377.176
111.5	27	3.47994e-06	0.340053	633.953
112	27	3.47994e-06	0.340053	535.679
112.5	27	9.81414e-06	0.382614	449.009
113	27	9.81414e-06	0.382614	389.442
113.5	27	9.81414e-06	0.382614	278.238
114	27	9.81414e-06	0.229572	186.804
114.5	27	9.81414e-06	0.229572	172.936
115	27	9.81414e-06	0.258235	326.562
115.5	27	3.70205e-06	0.258235	321.95
116	27	3.70205e-06	0.258235	164.268
116.5	27	3.70205e-06	0.399819	104.507
117	27	3.70205e-06	0.399819	174.805
117.5	27	3.70205e-06	0.45794	80.1004
118	27	3.70205e-06	0.45794	79.9105
118.5	27	2.2211e-06	0.45794	141.139
119	27	2.2211e-06	0.457216	86.6711
119.5	27	2.2211e-06	0.457216	86.0877
120	27	2.2211e-06	0.409055	216.215
120.5	27	2.2211e-06	0.409055	381.596
121	27	4.40186e-06	0.409055	1147.47
121.5	27	4.40186e-06	0.58454	102.19
122	27	4.40186e-06	0.58454	0
122.5	27	4.40186e-06	0	0
123	27	4.40186e-06	0	0
123.5	27	4.40186e-06	0	0
124	27	2.14369e-05	0	0
124.5	27	2.14369e-05	0	0
125	27	2.14369e-05	0	0
125.5	27	2.14369e-05	0	0
126	27	2.14369e-05	0	0
126.5	27	2.14369e-05	0	0
127	27	3.32342e-05	0	0
127.5	27	3.32342e-05	0	0
128	27	3.32342e-05	0	61.6763
128.5	27	3.32342e-05	0	224.874
129	27	3.32342e-05	0	138.272
129.5	27	4.50921e-05	0	0
130	27	4.50921e-05	0	0
130.5	27	4.50921e-05	0	0
131	27	4.50921e-05	0	0
131.5	27	4.50921e-05	0	0
132	27	4.50921e-05	0	0
132.5	27	4.71972e-05	0	0
133	27	4.71972e-05	0	0
133.5	27	4.71972e-05	0	0
134	27	4.71972e-05	0	0
134.5	27	4.71972e-05	0	0
135	27	5.11438e-05	0	0
73	27.5	5.66025e-08	0.0772801	52.3328
73.5	27.5	9.91489e-07	0.0772801	230.276
74	27.5	9.91489e-07	0.168539	174.971
74.5	27.5	9.91489e-07	0.168539	174.009
75	27.5	9.91489e-07	0.107657	281.509
75.5	27.5	9.91489e-07	0.107657	442.99
76	27.5	1.77013e-05	0.107657	408.303
76.5	27.5	1.77013e-05	0.174602	565.289
77	27.5	1.77013e-05	0.174602	614.166
77.5	27.5	1.77013e-05	0.148086	827.679
78	27.5	1.77013e-05	0.148086	896.358
78.5	27.5	1.77013e-05	0.148086	1302.52
79	27.5	1.65094e-05	0.166211	894.236
79.5	27.5	1.65094e-05	0.166211	801.779
80	27.5	1.65094e-05	0.197279	900.563
80.5	27.5	1.65094e-05	0.197279	805.841
81	27.5	1.65094e-05	0.197279	1029.61
81.5	27.5	1.65094e-05	0.258182	761.509
82	27.5	7.75159e-06	0.258182	717.204
82.5	27.5	7.75159e-06	0.229709	447.656
83	27.5	7.75159e-06	0.229709	322.207
83.5	27.5	7.75159e-06	0.229709	373.689
84	27.5	7.75159e-06	0.380569	304.315
84.5	27.5	7.58021e-06	0.380569	304.616
85	27.5	7.58021e-06	0.539176	229.332
85.5	27.5	7.58021e-06	0.539176	3017.38
86	27.5	7.58021e-06	0.539176	165.626
86.5	27.5	7.58021e-06	0.386404	72.5565
87	27.5	7.58021e-06	0.386404	5.69806
87.5	27.5	1.06122e-06	0.251881	11.3306
88	27.5	1.06122e-06	0.251881	3.88485
88.5	27.5	1.06122e-06	0.251881	17.0795
89	27.5	1.06122e-06	0.808475	5.08621
89.5	27.5	1.06122e-06	0.808475	4.99572
90	27.5	8.67173e-07	0.906672	11.703
90.5	27.5	8.67173e-07	0.906672	4.77969
91	27.5	8.67173e-07	0.906672	6.37298
91.5	27.5	8.67173e-07	0.862507	6.35661
92	27.5	8.67173e-07	0.862507	20.9715
92.5	27.5	8.67173e-07	0.699049	8.04674
93	27.5	4.37294e-07	0.699049	7.35035
93.5	27.5	4.37294e-07	0.699049	19.7308
94	27.5	4.37294e-07	0.682689	64.1639
94.5	27.5	4.37294e-07	0.682689	32.9884
95	27.5	4.37294e-07	0.839677	132.745
95.5	27.5	4.37294e-07	0.839677	235.63
96	27.5	1.38002e-06	0.839677	249.916
96.5	27.5	1.38002e-06	1.10505	36.736
97	27.5	1.38002e-06	1.10505	7.67524
97.5	27.5	1.38002e-06	1.19366	7.698
98	27.5	1.38002e-06	1.19366	1.37166
98.5	27.5	7.48359e-07	1.19366	2.88878
99	27.5	7.48359e-07	1.12362	17.1933
99.5	27.5	7.48359e-07	1.12362	23.4713
100	27.5	7.48359e-07	1.15503	31.7662
100.5	27.5	7.48359e-07	1.15503	12.4962
101	27.5	7.48359e-07	1.15503	28.9576
101.5	27.5	3.77525e-06	0.323931	39.3225
102	27.5	3.77525e-06	0.323931	33.228
102.5	27.5	3.77525e-06	0.461358	281.738
103	27.5	3.77525e-06	0.461358	95.8036
103.5	27.5	3.77525e-06	0.461358	116.645
104	27.5	3.77525e-06	0.385126	171.565
104.5	27.5	8.79853e-06	0.385126	186.116
105	27.5	8.79853e-06	0.709118	286.539
105.5	27.5	8.79853e-06	0.709118	300.336
106	27.5	8.79853e-06	0.709118	178.96
106.5	27.5	8.79853e-06	0.528598	267.929
107	27.5	5.52095e-06	0.528598	500.152
107.5	27.5	5.52095e-06	0.403545	220.79
108	27.5	5.52095e-06	0.403545	165.57
108.5	27.5	5.52095e-06	0.403545	202.363
109	27.5	5.52095e-06	0.400171	87.3122
109.5	27.5	5.52095e-06	0.400171	190.94
110	27.5	3.47994e-06	0.382154	364.32
110.5	27.5	3.47994e-06	0.382154	195.366
111	27.5	3.47994e-06	0.382154	216.693
111.5	27.5	3.47994e-06	0.340053	450.743
112	27.5	3.47994e-06	0.340053	567.849
112.5	27.5	9.81414e-06	0.382614	416.406
113	27.5	9.81414e-06	0.382614	750.431
113.5	27.5	9.81414e-06	0.382614	776.025
114	27.5	9.81414e-06	0.229572	759.203
114.5	27.5	9.81414e-06	0.229572	422.272
115	27.5	9.81414e-06	0.258235	378.721
115.5	27.5	3.70205e-06	0.258235	306.112
116	27.5	3.70205e-06	0.258235	202.379
116.5	27.5	3.70205e-06	0.399819	402.568
117	27.5	3.70205e-06	0.399819	215.083
117.5	27.5	3.70205e-06	0.45794	70.6779
118	27.5	3.70205e-06	0.45794	41.1429
118.5	27.5	2.2211e-06	0.45794	95.1766
119	27.5	2.2211e-06	0.457216	104.857
119.5	27.5	2.2211e-06	0.457216	56.6606
120	27.5	2.2211e-06	0.409055	95.2778
120.5	27.5	2.2211e-06	0.409055	445.839
121	27.5	4.40186e-06	0.409055	3386.66
121.5	27.5	4.40186e-06	0.58454	919.043
122	27.5	4.40186e-06	0.58454	0
122.5	27.5	4.40186e-06	0	0
123	27.5	4.40186e-06	0	0
123.5	27.5	4.40186e-06	0	0
124	27.5	2.14369e-05	0	0
124.5	27.5	2.14369e-05	0	0
125	27.5	2.14369e-05	0	0
125.5	27.5	2.14369e-05	0	0
126	27.5	2.14369e-05	0	0
126.5	27.5	2.14369e-05	0	0
127	27.5	3.32342e-05	0	0
127.5	27.5	3.32342e-05	0	0
128	27.5	3.32342e-05	0	0
128.5	27.5	3.32342e-05	0	0
129	27.5	3.32342e-05	0	94.4316
129.5	27.5	4.50921e-05	0	104.791
130	27.5	4.50921e-05	0	0
130.5	27.5	4.50921e-05	0	0
131	27.5	4.50921e-05	0	0
131.5	27.5	4.50921e-05	0	0
132	27.5	4.50921e-05	0	0
132.5	27.5	4.71972e-05	0	0
133	27.5	4.71972e-05	0	0
133.5	27.5	4.71972e-05	0	0
134	27.5	4.71972e-05	0	0
[truncated: 6,627 more rows]

## Sheet: SC2-d
NH3	Random Forest												Xgboost												Decision Tree
	1	2	3	4	5	6	7	8	9	10			1	2	3	4	5	6	7	8	9	10			1	2	3	4	5	6	7	8	9	10
1	0.085	0.078	0.166	0.296	0.3	0.155	0.258	0.028	0.062	0.035		1	0.071	0.075	0.145	0.324	0.261	0.175	0.268	0.044	0.09	0.043		1	0.087	0.085	0.16	0.305	0.115	0.221	0.274	0.044	0.09	0.043
2	0.075	0.045	0.031	0.039	0.053	0.071	0.042	0.04	0.029	0.044		2	0.106	0.044	0.043	0.062	0.077	0.06	0.034	0.051	0.026	0.047		2	0.056	0.037	0.035	0.06	0.082	0.06	0.037	0.051	0.026	0.047
3	0.008	0.018	0.015	0.016	0.023	0.039	0.092	0.018	0.042	0.027		3	0.008	0.017	0.014	0.012	0.016	0.044	0.102	0.035	0.042	0.027		3	0.005	0.023	0.013	0.017	0.015	0.045	0.098	0.035	0.042	0.027
4-1	0.025	0	0.002	0.004	0	0.001	0.002	0.023	0.011	0.072		4-1	0.004	0	0.001	0.001	0	0.001	0.003	0.008	0.015	0.085		4-1	0.012	0	0.001	0.004	0	0.001	0.002	0.008	0.015	0.085
4-2	0.084	0.056	0.072	0.057	0.186	0.136	0.069	0.348	0.143	0.218		4-2	0.121	0.046	0.046	0.135	0.22	0.085	0.072	0.305	0.166	0.264		4-2	0.12	0.042	0.083	0.068	0.411	0.104	0.073	0.305	0.166	0.264
4-3	0.006	0.021	0.026	0.023	0.029	0.019	0.046	0.022	0.061	0.025		4-3	0.017	0.025	0.02	0.023	0.019	0.019	0.04	0.039	0.04	0.024		4-3	0.041	0.023	0.016	0.025	0.012	0.008	0.045	0.039	0.04	0.024
4-4	0.001	0.003	0	0.052	0	0.016	0.012	0.032	0.023	0.025		4-4	0.001	0.002	0	0.03	0.002	0.027	0.011	0.05	0.017	0.021		4-4	0.001	0.004	0	0.006	0.001	0.014	0.01	0.05	0.017	0.021
A-1	0	0	0	0	0	0	0	0	0	0		A-1	0	0	0	0	0	0	0	0	0	0		A-1	0	0	0	0	0	0	0	0	0	0
A-2	0	0	0	0	0	0	0	0	0	0		A-2	0	0	0	0	0	0	0	0	0	0		A-2	0	0	0	0	0	0	0	0	0	0
A-3	0	0	0	0	0	0	0	0	0	0		A-3	0	0	0	0	0	0	0	0	0	0		A-3	0	0	0	0	0	0	0	0	0	0
A-4	0	0	0	0	0	0	0	0	0	0		A-4	0	0	0	0	0	0	0	0	0	0		A-4	0	0	0	0	0	0	0	0	0	0
B-1	0	0	0	0	0	0	0	0	0	0		B-1	0	0	0	0	0	0	0	0	0	0		B-1	0	0	0	0	0	0	0	0	0	0
B-2	0.058	0.072	0.043	0.082	0.039	0.078	0.039	0.061	0.1	0.084		B-2	0.058	0.106	0.046	0.071	0.048	0.073	0.044	0.088	0.062	0.075		B-2	0.057	0.066	0.049	0.067	0.055	0.08	0.039	0.088	0.062	0.075
B-3	0	0	0	0	0	0	0	0	0	0		B-3	0	0	0	0	0	0	0	0	0	0		B-3	0	0	0	0	0	0	0	0	0	0
B-4	0	0	0	0	0	0	0	0	0	0		B-4	0	0	0	0	0	0	0	0	0	0		B-4	0	0	0	0	0	0	0	0	0	0
B-5	0	0	0	0	0	0	0	0	0	0		B-5	0	0	0	0	0	0	0	0	0	0		B-5	0	0	0	0	0	0	0	0	0	0
B-6	0	0	0	0	0	0	0	0	0	0		B-6	0	0	0	0	0	0	0	0	0	0		B-6	0	0	0	0	0	0	0	0	0	0
B-7	0	0	0	0	0	0	0	0	0	0		B-7	0	0	0	0	0	0	0	0	0	0		B-7	0	0	0	0	0	0	0	0	0	0
C-1	0.001	0.001	0.001	0.002	0.001	0.002	0.004	0.002	0.002	0		C-1	0	0.003	0	0.006	0.001	0.001	0.001	0.005	0.003	0.001		C-1	0.001	0.002	0.001	0.005	0.001	0.001	0.002	0.005	0.003	0.001
C-2	0.001	0.001	0.001	0.003	0	0	0.001	0.002	0.001	0		C-2	0.002	0.002	0.001	0.006	0	0	0.001	0.002	0.002	0		C-2	0	0.001	0.001	0.003	0.001	0	0.002	0.002	0.002	0
C-3	0.327	0.147	0.152	0.073	0.106	0.122	0.087	0.083	0.092	0.143		C-3	0.305	0.114	0.194	0.071	0.063	0.115	0.083	0.083	0.1	0.105		C-3	0.232	0.101	0.155	0.085	0.055	0.109	0.08	0.083	0.1	0.105
C-4	0.086	0.151	0.041	0.043	0.031	0.036	0.037	0.032	0.036	0.063		C-4	0.073	0.159	0.044	0.037	0.036	0.049	0.04	0.049	0.055	0.041		C-4	0.054	0.129	0.064	0.068	0.033	0.041	0.04	0.049	0.055	0.041
C-5	0.051	0.025	0.027	0.02	0.017	0.031	0.031	0.029	0.073	0.023		C-5	0.039	0.023	0.018	0.024	0.019	0.03	0.037	0.06	0.085	0.027		C-5	0.035	0.024	0.022	0.019	0.034	0.031	0.034	0.06	0.085	0.027
C-6	0	0	0	0	0	0	0	0	0	0		C-6	0	0	0	0	0	0	0	0	0	0		C-6	0	0	0	0	0	0	0	0	0	0
C-7	0.059	0.058	0.159	0.034	0.06	0.08	0.066	0.06	0.06	0.044		C-7	0.062	0.073	0.193	0.042	0.064	0.086	0.058	0.062	0.078	0.039		C-7	0.076	0.081	0.156	0.059	0.034	0.066	0.058	0.062	0.078	0.039
D-1	0	0	0	0	0	0	0	0	0	0		D-1	0	0	0	0	0	0	0	0	0	0		D-1	0	0	0	0	0	0	0	0	0	0
D-2	0	0	0	0	0	0	0	0	0	0		D-2	0	0	0	0	0	0	0	0	0	0		D-2	0	0	0	0	0	0	0	0	0	0
D-3	0	0	0	0	0	0	0	0	0	0		D-3	0	0	0	0	0	0	0	0	0	0		D-3	0	0	0	0	0	0	0	0	0	0
D-4	0	0	0	0	0	0	0	0	0	0		D-4	0	0	0	0	0	0	0	0	0	0		D-4	0	0	0	0	0	0	0	0	0	0
D-5	0	0	0	0	0	0	0	0	0	0		D-5	0	0	0	0	0	0	0	0	0	0		D-5	0	0	0	0	0	0	0	0	0	0
D-6	0	0	0	0	0	0	0	0	0	0		D-6	0	0	0	0	0	0	0	0	0	0		D-6	0	0	0	0	0	0	0	0	0	0
E-1	0.096	0.052	0.039	0.028	0.018	0.039	0.089	0.045	0.091	0.041		E-1	0.065	0.067	0.03	0.021	0.019	0.06	0.085	0.012	0.033	0.021		E-1	0.136	0.074	0.034	0.02	0.029	0.038	0.09	0.012	0.033	0.021
E-2	0.015	0.027	0.113	0.057	0.041	0.052	0.036	0.053	0.049	0.036		E-2	0.032	0.046	0.044	0.051	0.045	0.047	0.034	0.041	0.07	0.025		E-2	0.065	0.042	0.143	0.057	0.042	0.034	0.033	0.041	0.07	0.025
E-3	0	0	0	0	0	0	0	0	0	0		E-3	0	0	0	0	0	0	0	0	0	0		E-3	0	0	0	0	0	0	0	0	0	0
F-1	0	0	0	0	0	0	0	0	0	0		F-1	0	0	0	0	0	0	0	0	0	0		F-1	0	0	0	0	0	0	0	0	0	0
F-2	0.021	0.245	0.114	0.17	0.096	0.122	0.092	0.122	0.122	0.12		F-2	0.036	0.197	0.16	0.082	0.108	0.129	0.085	0.065	0.116	0.155		F-2	0.024	0.266	0.069	0.133	0.08	0.146	0.085	0.065	0.116	0.155
F-3	0	0	0	0	0	0	0	0	0	0		F-3	0	0	0	0	0	0	0	0	0	0		F-3	0	0	0	0	0	0	0	0	0	0
Training set
MSE	5.254	8.17	7.387	9.988	7.053	9.305	4.717	3.882	3.813	4.452			5.657	7.012	8.085	10.428	7.321	9.408	4.717	3.897	3.969	4.379			5.583	7.37	7.388	9.977	7.848	9.062	4.717	3.343	3.839	4.38
RMSE	2.292	2.858	2.718	3.16	2.656	3.05	2.172	1.97	1.953	2.11			2.378	2.648	2.843	3.229	2.706	3.067	2.172	1.974	1.992	2.093			2.363	2.715	2.718	3.159	2.801	3.01	2.172	1.828	1.959	2.093
MAE	1.465	1.744	1.758	1.963	1.714	1.572	1.368	1.227	1.277	1.269			1.447	1.696	1.828	1.964	1.708	1.588	1.368	1.222	1.299	1.217			1.443	1.673	1.746	1.891	1.719	1.581	1.369	1.186	1.266	1.217
MAPE	56.363	58.869	60.35	62.222	55.267	56.664	55.581	53.717	54.947	57.146			55.548	57.829	61.47	62.184	55.68	56.947	55.55	53.751	55.843	54.777			55.538	57.19	60.328	61.693	56.067	56.524	55.559	52.613	55.116	54.779
R²	0.371	0.393	0.398	0.395	0.453	0.376	0.385	0.433	0.413	0.419			0.384	0.415	0.391	0.392	0.43	0.361	0.385	0.415	0.399	0.408			0.393	0.403	0.391	0.391	0.415	0.377	0.385	0.459	0.412	0.408
Test set
MSE	6.951	5.924	8.303	10.996	10.448	8.972	5.526	5.205	4.248	3.447			5.858	8.732	6.612	9.781	9.793	8.809	5.542	5.177	3.897	3.64			6.303	7.799	8.265	10.89	8.936	9.501	5.574	5.177	3.897	3.64
RMSE	2.636	2.434	2.881	3.316	3.232	2.995	2.351	2.281	2.061	1.857			2.42	2.955	2.571	3.127	3.129	2.968	2.354	2.275	1.974	1.908			2.511	2.793	2.875	3.3	2.989	3.082	2.361	2.275	1.974	1.908
MAE	1.487	1.675	1.87	2.036	1.865	1.64	1.523	1.3	1.318	1.28			1.507	1.737	1.752	1.969	1.86	1.619	1.533	1.324	1.271	1.415			1.547	1.783	1.85	2.061	1.874	1.59	1.523	1.324	1.271	1.415
MAPE	58.229	57.686	64.609	65.628	61.663	59.442	60.03	59.873	57.838	59.662			61.089	61.465	59.397	64.254	60.611	59.333	59.514	58.907	55.556	64.218			60.798	63.297	64.138	68.716	60.402	59.641	60.498	58.907	55.556	64.218
R²	0.321	0.07	0.069	0.026	0.041	-0.006	0.014	0.026	0.022	0.002			0.306	0.319	0.39	0.345	0.384	0.326	0.311	0.363	0.349	0.334			0.237	0.351	0.385	0.342	0.373	0.302	0.305	0.363	0.349	0.334
TN	Random Forest												XGboost												Decision Tree
	1	2	3	4	5	6	7	8	9	10			1	2	3	4	5	6	7	8	9	10			1	2	3	4	5	6	7	8	9	10
1	0.208	0.091	0.19	0.233	0.209	0.192	0.103	0.231	0.317	0.06		1	0.102	0.117	0.169	0.233	0.213	0.187	0.108	0.224	0.355	0.09		1	0.122	0.142	0.166	0.192	0.21	0.14	0.119	0.224	0.355	0.09
2	0.055	0.034	0.032	0.043	0.035	0.109	0.067	0.041	0.03	0.036		2	0.045	0.033	0.029	0.053	0.03	0.119	0.06	0.065	0.027	0.024		2	0.059	0.033	0.043	0.07	0.043	0.226	0.061	0.065	0.027	0.024
3	0.013	0.016	0.013	0.016	0.015	0.036	0.026	0.03	0.035	0.14		3	0.009	0.025	0.015	0.015	0.018	0.043	0.031	0.032	0.048	0.105		3	0.01	0.025	0.012	0.018	0.02	0.031	0.038	0.032	0.048	0.105
4-1	0.001	0	0	0.002	0.001	0.001	0.003	0.003	0.009	0.023		4-1	0.003	0	0.001	0.002	0.001	0.001	0.004	0.007	0.003	0.025		4-1	0.003	0	0.001	0.002	0.003	0.002	0.002	0.007	0.003	0.025
4-2	0.092	0.06	0.075	0.115	0.08	0.042	0.118	0.056	0.054	0.055		4-2	0.088	0.077	0.063	0.117	0.084	0.057	0.13	0.053	0.057	0.069		4-2	0.119	0.117	0.071	0.117	0.113	0.043	0.116	0.053	0.057	0.069
4-3	0.004	0.054	0.014	0.008	0.015	0.011	0.031	0.007	0.014	0.056		4-3	0.004	0.023	0.012	0.011	0.013	0.012	0.019	0.014	0.02	0.085		4-3	0.002	0.02	0.017	0.012	0.013	0.019	0.03	0.014	0.02	0.085
4-4	0	0	0.001	0.016	0.002	0.002	0.005	0.008	0.005	0.04		4-4	0	0.001	0	0.021	0.001	0.005	0.003	0.007	0.008	0.041		4-4	0	0	0	0.025	0.001	0.004	0.004	0.007	0.008	0.041
A-1	0	0	0	0	0	0	0	0	0	0		A-1	0	0	0	0	0	0	0	0	0	0		A-1	0	0	0	0	0	0	0	0	0	0
A-2	0	0	0	0	0	0	0	0	0	0		A-2	0	0	0	0	0	0	0	0	0	0		A-2	0	0	0	0	0	0	0	0	0	0
A-3	0	0	0	0	0	0	0	0	0	0		A-3	0	0	0	0	0	0	0	0	0	0		A-3	0	0	0	0	0	0	0	0	0	0
A-4	0	0	0	0	0	0	0	0	0	0		A-4	0	0	0	0	0	0	0	0	0	0		A-4	0	0	0	0	0	0	0	0	0	0
B-1	0	0	0	0	0	0	0	0	0	0		B-1	0	0	0	0	0	0	0	0	0	0		B-1	0	0	0	0	0	0	0	0	0	0
B-2	0.091	0.035	0.046	0.146	0.064	0.071	0.074	0.049	0.09	0.059		B-2	0.141	0.071	0.058	0.083	0.063	0.08	0.067	0.048	0.096	0.043		B-2	0.11	0.063	0.042	0.103	0.095	0.07	0.063	0.048	0.096	0.043
B-3	0	0	0	0	0	0	0	0	0	0		B-3	0	0	0	0	0	0	0	0	0	0		B-3	0	0	0	0	0	0	0	0	0	0
B-4	0	0	0	0	0	0	0	0	0	0		B-4	0	0	0	0	0	0	0	0	0	0		B-4	0	0	0	0	0	0	0	0	0	0
B-5	0	0	0	0	0	0	0	0	0	0		B-5	0	0	0	0	0	0	0	0	0	0		B-5	0	0	0	0	0	0	0	0	0	0
B-6	0	0	0	0	0	0	0	0	0	0		B-6	0	0	0	0	0	0	0	0	0	0		B-6	0	0	0	0	0	0	0	0	0	0
B-7	0	0	0	0	0	0	0	0	0	0		B-7	0	0	0	0	0	0	0	0	0	0		B-7	0	0	0	0	0	0	0	0	0	0
C-1	0	0.002	0.002	0	0.001	0.001	0.001	0.002	0	0.001		C-1	0.001	0.001	0.003	0	0.002	0.001	0.001	0	0	0.001		C-1	0.001	0.001	0.002	0	0.001	0.003	0	0	0	0.001
C-2	0.001	0.002	0.008	0.021	0	0.001	0	0.003	0	0		C-2	0.001	0.001	0.014	0.024	0.001	0	0.001	0	0	0		C-2	0	0.003	0.012	0.017	0.002	0.003	0	0	0	0
C-3	0.155	0.164	0.147	0.086	0.104	0.112	0.165	0.164	0.199	0.054		C-3	0.158	0.137	0.135	0.087	0.116	0.112	0.16	0.222	0.115	0.09		C-3	0.158	0.139	0.116	0.091	0.131	0.086	0.163	0.222	0.115	0.09
C-4	0.14	0.243	0.134	0.072	0.107	0.082	0.139	0.122	0.032	0.091		C-4	0.165	0.265	0.107	0.051	0.085	0.078	0.141	0.062	0.035	0.075		C-4	0.164	0.209	0.203	0.094	0.129	0.091	0.137	0.062	0.035	0.075
C-5	0.038	0.014	0.096	0.028	0.06	0.076	0.032	0.099	0.018	0.126		C-5	0.053	0.014	0.093	0.026	0.06	0.068	0.03	0.073	0.026	0.083		C-5	0.05	0.021	0.065	0.03	0.023	0.036	0.033	0.073	0.026	0.083
C-6	0	0	0	0	0	0	0	0	0	0		C-6	0	0	0	0	0	0	0	0	0	0		C-6	0	0	0	0	0	0	0	0	0	0
C-7	0.081	0.126	0.095	0.057	0.055	0.084	0.116	0.069	0.056	0.06		C-7	0.091	0.099	0.133	0.085	0.059	0.096	0.127	0.069	0.07	0.052		C-7	0.086	0.124	0.103	0.07	0.091	0.094	0.121	0.069	0.07	0.052
D-1	0	0	0	0	0	0	0	0	0	0		D-1	0	0	0	0	0	0	0	0	0	0		D-1	0	0	0	0	0	0	0	0	0	0
D-2	0	0	0	0	0	0	0	0	0	0		D-2	0	0	0	0	0	0	0	0	0	0		D-2	0	0	0	0	0	0	0	0	0	0
D-3	0	0	0	0	0	0	0	0	0	0		D-3	0	0	0	0	0	0	0	0	0	0		D-3	0	0	0	0	0	0	0	0	0	0
D-4	0	0	0	0	0	0	0	0	0	0		D-4	0	0	0	0	0	0	0	0	0	0		D-4	0	0	0	0	0	0	0	0	0	0
D-5	0	0	0	0	0	0	0	0	0	0		D-5	0	0	0	0	0	0	0	0	0	0		D-5	0	0	0	0	0	0	0	0	0	0
D-6	0	0	0	0	0	0	0	0	0	0		D-6	0	0	0	0	0	0	0	0	0	0		D-6	0	0	0	0	0	0	0	0	0	0
E-1	0.056	0.042	0.055	0.021	0.015	0.074	0.017	0.008	0.029	0.07		E-1	0.065	0.042	0.064	0.045	0.028	0.048	0.013	0.011	0.032	0.049		E-1	0.055	0.046	0.027	0.035	0.025	0.061	0.011	0.011	0.032	0.049
E-2	0.021	0.042	0.051	0.041	0.195	0.039	0.049	0.04	0.081	0.053		E-2	0.013	0.049	0.049	0.05	0.173	0.029	0.059	0.036	0.042	0.054		E-2	0.013	0.023	0.074	0.043	0.059	0.028	0.05	0.036	0.042	0.054
E-3	0	0	0	0	0	0	0	0	0	0		E-3	0	0	0	0	0	0	0	0	0	0		E-3	0	0	0	0	0	0	0	0	0	0
F-1	0	0	0	0	0	0	0	0	0	0		F-1	0	0	0	0	0	0	0	0	0	0		F-1	0	0	0	0	0	0	0	0	0	0
F-2	0.043	0.073	0.04	0.095	0.041	0.067	0.054	0.068	0.03	0.076		F-2	0.061	0.044	0.053	0.097	0.053	0.062	0.046	0.076	0.066	0.115		F-2	0.047	0.034	0.046	0.081	0.042	0.064	0.051	0.076	0.066	0.115
F-3	0	0	0	0	0	0	0	0	0	0		F-3	0	0	0	0	0	0	0	0	0	0		F-3	0	0	0	0	0	0	0	0	0	0
Training set
MSE	0.039	0.083	0.083	0.077	0.105	0.114	0.101	0.132	0.16	0.145			0.039	0.083	0.077	0.078	0.109	0.101	0.101	0.122	0.13	0.205			0.042	0.077	0.089	0.085	0.104	0.097	0.101	0.159	0.159	0.227
RMSE	0.198	0.289	0.288	0.277	0.324	0.338	0.317	0.363	0.4	0.381			0.198	0.288	0.278	0.28	0.33	0.318	0.317	0.35	0.361	0.453			0.206	0.278	0.299	0.291	0.322	0.311	0.317	0.399	0.399	0.476
MAE	0.114	0.149	0.149	0.159	0.176	0.161	0.155	0.15	0.181	0.171			0.112	0.149	0.142	0.158	0.177	0.154	0.155	0.146	0.177	0.194			0.114	0.142	0.154	0.159	0.173	0.16	0.155	0.165	0.18	0.191
MAPE	88.956	88.559	88.256	89.918	92.393	94.775	96.08	95.566	93.934	91.242			87.339	88.163	89.437	89.523	92.087	94.596	96.071	95.851	93.848	94.088			88.276	89.326	90.777	89.735	92.195	94.497	96.294	97.819	92.496	93.438
R²	0.095	0.094	0.097	0.087	0.081	0.055	0.064	0.062	0.077	0.117			0.106	0.097	0.073	0.081	0.085	0.051	0.064	0.063	0.077	0.114			0.087	0.073	0.089	0.082	0.061	0.068	0.064	0.074	0.079	0.1
Test set
MSE	0.048	0.16	0.067	0.094	0.092	0.072	0.069	0.17	0.124	0.367			0.048	0.142	0.081	0.091	0.085	0.104	0.07	0.193	0.198	0.227			0.041	0.207	0.052	0.076	0.102	0.114	0.069	0.193	0.198	0.227
RMSE	0.219	0.4	0.258	0.307	0.304	0.269	0.263	0.412	0.353	0.606			0.22	0.377	0.285	0.302	0.291	0.323	0.264	0.44	0.445	0.476			0.202	0.455	0.228	0.275	0.319	0.338	0.263	0.44	0.445	0.476
MAE	0.117	0.15	0.151	0.166	0.179	0.156	0.134	0.168	0.183	0.204			0.123	0.146	0.158	0.172	0.179	0.16	0.135	0.172	0.186	0.188			0.121	0.151	0.143	0.168	0.18	0.156	0.136	0.172	0.186	0.188
MAPE	97.444	105.787	98.023	103.2	97.099	96.067	105.075	119.447	103.573	125.533			102.802	100.185	101.011	100.189	97.131	107.668	106.309	121.56	110.091	102.239			97.034	105.157	87.398	99.668	106.214	97.696	104.082	121.56	110.091	102.239
R²	0.343	0.299	0.312	0.311	0.321	0.297	0.29	0.313	0.315	0.325			0.311	0.311	0.376	0.318	0.286	0.32	0.283	0.307	0.316	0.273			0.346	0.308	0.327	0.305	0.316	0.278	0.29	0.307	0.316	0.273

## Sheet: SC2-e
NH3	Random Forest												Xgboost												Decision Tree
	1	2	3	4	5	6	7	8	9	10			1	2	3	4	5	6	7	8	9	10			1	2	3	4	5	6	7	8	9	10
1	0	0	0	0	0	0	0	0	0	0		1	0	0	0	0	0	0	0	0	0	0		1	0	0	0	0	0	0	0	0	0	0
2	0	0	0	0	0	0	0	0	0	0		2	0	0	0	0	0	0	0	0	0	0		2	0	0	0	0	0	0	0	0	0	0
3	0	0	0	0	0	0	0	0	0	0		3	0	0	0	0	0	0	0	0	0	0		3	0	0	0	0	0	0	0	0	0	0
4-1	0	0	0	0	0	0	0	0	0	0		4-1	0	0	0	0	0	0	0	0	0	0		4-1	0	0	0	0	0	0	0	0	0	0
4-2	0	0	0	0	0	0	0	0	0	0		4-2	0	0	0	0	0	0	0	0	0	0		4-2	0	0	0	0	0	0	0	0	0	0
4-3	0	0	0	0	0	0	0	0	0	0		4-3	0	0	0	0	0	0	0	0	0	0		4-3	0	0	0	0	0	0	0	0	0	0
4-4	0	0	0.003	0.003	0.002	0.004	0.001	0.021	0.021	0.024		4-4	0.001	0	0.003	0.003	0.003	0.006	0	0.007	0.015	0.023		4-4	0.002	0	0.003	0.007	0.002	0.004	0	0.013	0.008	0.02
A-1	0.018	0	0.005	0.046	0.004	0.02	0.004	0.016	0.012	0.011		A-1	0.01	0	0.011	0.032	0.009	0.019	0.006	0.02	0.018	0.013		A-1	0.013	0	0.009	0.05	0.005	0.02	0.005	0.012	0.011	0.018
A-2	0.014	0.014	0.012	0.02	0.048	0.022	0.019	0.019	0.015	0.003		A-2	0.014	0.014	0.016	0.026	0.025	0.043	0.017	0.018	0.014	0.009		A-2	0.015	0.017	0.009	0.019	0.025	0.022	0.013	0.028	0.019	0.003
A-3	0.062	0	0.018	0.034	0.102	0.057	0.046	0.061	0.042	0.054		A-3	0.025	0.001	0.05	0.044	0.064	0.052	0.047	0.043	0.038	0.048		A-3	0.036	0.001	0.022	0.043	0.124	0.057	0.041	0.042	0.037	0.062
A-4	0	0	0	0	0	0	0	0	0	0		A-4	0	0	0	0	0	0	0	0	0	0		A-4	0	0	0	0	0	0	0	0	0	0
B-1	0.055	0.051	0.083	0.089	0.021	0.047	0.027	0.031	0.059	0.027		B-1	0.066	0.05	0.064	0.087	0.027	0.062	0.021	0.032	0.057	0.024		B-1	0.055	0.051	0.078	0.067	0.025	0.047	0.024	0.059	0.053	0.024
B-2	0	0	0	0	0	0	0	0	0	0		B-2	0	0	0	0	0	0	0	0	0	0		B-2	0	0	0	0	0	0	0	0	0	0
B-3	0	0	0	0	0	0	0	0	0	0		B-3	0	0	0	0	0	0	0	0	0	0		B-3	0	0	0	0	0	0	0	0	0	0
B-4	0.026	0.044	0.029	0.038	0.015	0.068	0.064	0.041	0.047	0.023		B-4	0.036	0.06	0.034	0.044	0.019	0.052	0.039	0.048	0.038	0.031		B-4	0.04	0.04	0.033	0.045	0.017	0.068	0.054	0.041	0.059	0.035
B-5	0	0	0	0	0	0	0	0	0	0		B-5	0	0	0	0	0	0	0	0	0	0		B-5	0	0	0	0	0	0	0	0	0	0
B-6	0.001	0	0.003	0.01	0.007	0.01	0.001	0.009	0.007	0.005		B-6	0.002	0	0.004	0.017	0.012	0.011	0.001	0.025	0.006	0.006		B-6	0.002	0	0.003	0.015	0.02	0.01	0.002	0.01	0.005	0.006
B-7	0.108	0.069	0.104	0.044	0.033	0.094	0.05	0.05	0.027	0.059		B-7	0.102	0.107	0.062	0.045	0.063	0.085	0.044	0.047	0.035	0.054		B-7	0.112	0.123	0.082	0.064	0.04	0.094	0.057	0.044	0.053	0.063
C-1	0	0	0	0	0	0	0	0	0	0		C-1	0	0	0	0	0	0	0	0	0	0		C-1	0	0	0	0	0	0	0	0	0	0
C-2	0	0	0	0	0	0	0	0	0	0		C-2	0	0	0	0	0	0	0	0	0	0		C-2	0	0	0	0	0	0	0	0	0	0
C-3	0	0	0	0	0	0	0	0	0	0		C-3	0	0	0	0	0	0	0	0	0	0		C-3	0	0	0	0	0	0	0	0	0	0
C-4	0.197	0.176	0.063	0.045	0.47	0.339	0.406	0.372	0.06	0.056		C-4	0.239	0.123	0.05	0.043	0.49	0.369	0.228	0.305	0.081	0.086		C-4	0.184	0.173	0.086	0.056	0.474	0.339	0.308	0.373	0.154	0.079
C-5	0.107	0	0.01	0.087	0.01	0.061	0.001	0.025	0.01	0.052		C-5	0.116	0	0.03	0.086	0.009	0.039	0.004	0.035	0.005	0.054		C-5	0.143	0.001	0.024	0.081	0.012	0.061	0.005	0.037	0.023	0.037
C-6	0	0	0	0	0	0	0	0	0	0		C-6	0	0	0	0	0	0	0	0	0	0		C-6	0	0	0	0	0	0	0	0	0	0
C-7	0	0	0	0	0	0	0	0	0	0		C-7	0	0	0	0	0	0	0	0	0	0		C-7	0	0	0	0	0	0	0	0	0	0
D-1	0.077	0.325	0.144	0.135	0.107	0.097	0.066	0.054	0.495	0.349		D-1	0.087	0.335	0.228	0.126	0.124	0.074	0.057	0.041	0.51	0.3		D-1	0.069	0.312	0.193	0.106	0.115	0.097	0.044	0.028	0.415	0.316
D-2	0.023	0.001	0	0	0	0	0	0	0	0		D-2	0.015	0.002	0	0	0	0	0	0	0	0		D-2	0.019	0	0	0	0	0	0	0	0	0
D-3	0.024	0	0	0	0	0	0	0	0	0		D-3	0.026	0	0	0	0	0	0	0	0	0		D-3	0.031	0	0	0	0	0	0	0	0	0
D-4	0.055	0.089	0.139	0.037	0.038	0.034	0.036	0.043	0.08	0.042		D-4	0.054	0.088	0.093	0.053	0.041	0.039	0.058	0.064	0.056	0.088		D-4	0.063	0.078	0.1	0.063	0.046	0.034	0.047	0.048	0.048	0.081
D-5	0	0	0	0	0	0	0	0	0	0		D-5	0	0	0	0	0	0	0	0	0	0		D-5	0	0	0	0	0	0	0	0	0	0
D-6	0	0	0	0	0	0	0	0	0	0		D-6	0	0	0	0	0	0	0	0	0	0		D-6	0	0	0	0	0	0	0	0	0	0
E-1	0	0	0	0	0	0	0	0	0	0		E-1	0	0	0	0	0	0	0	0	0	0		E-1	0	0	0	0	0	0	0	0	0	0
E-2	0.111	0.117	0.322	0.317	0.117	0.041	0.177	0.143	0.043	0.048		E-2	0.063	0.105	0.29	0.329	0.072	0.036	0.348	0.186	0.058	0.048		E-2	0.082	0.073	0.294	0.281	0.061	0.041	0.288	0.162	0.048	0.045
E-3	0.033	0.025	0.021	0.038	0.01	0.05	0.042	0.048	0.035	0.18		E-3	0.035	0.034	0.022	0.027	0.017	0.061	0.041	0.06	0.029	0.142		E-3	0.036	0.028	0.026	0.032	0.014	0.05	0.042	0.056	0.028	0.16
F-1	0.088	0.087	0.044	0.056	0.016	0.057	0.06	0.065	0.048	0.065		F-1	0.109	0.081	0.042	0.039	0.025	0.051	0.089	0.071	0.042	0.072		F-1	0.098	0.103	0.038	0.071	0.02	0.057	0.072	0.048	0.038	0.051
F-2	0	0	0	0	0	0	0	0	0	0		F-2	0	0	0	0	0	0	0	0	0	0		F-2	0	0	0	0	0	0	0	0	0	0
F-3	0	0	0	0	0	0	0	0	0	0		F-3	0	0	0	0	0	0	0	0	0	0		F-3	0	0	0	0	0	0	0	0	0	0
Training set												Training set												Training set
MSE	3.132	3.986	3.387	5.987	7.333	7.584	8.04	9.46	5.611	8.586		MSE	3.379	4.567	3.356	5.699	7.299	8.979	8.54	10.327	6.166	10.007		MSE	3.234	4.666	3.345	5.795	6.556	7.584	7.684	10.49	10.49	9.583
RMSE	1.77	1.996	1.84	2.447	2.708	2.754	2.836	3.076	2.369	2.93		RMSE	1.838	2.137	1.832	2.387	2.702	2.997	2.922	3.213	2.483	3.163		RMSE	1.798	2.16	1.829	2.407	2.56	2.754	2.772	3.239	3.239	3.096
MAE	1.082	1.231	1.143	1.582	1.755	1.583	1.71	1.807	1.531	1.92		MAE	1.113	1.247	1.099	1.559	1.738	1.666	1.749	1.846	1.57	1.976		MAE	1.08	1.259	1.137	1.565	1.726	1.583	1.695	1.861	1.861	1.979
MAPE	50.114	51.773	50.089	56.254	60.445	56.536	65.102	66.651	61.633	51.446		MAPE	49.969	51.5	48.903	55.452	60.423	57.893	65.371	67.025	61.101	51.832		MAPE	50.199	51.701	49.588	55.799	59.737	56.536	64.51	67.336	67.336	52.288
R²	0.389	0.376	0.379	0.403	0.38	0.357	0.344	0.343	0.443	0.519		R²	0.395	0.37	0.384	0.401	0.373	0.358	0.349	0.345	0.442	0.505		R²	0.394	0.378	0.381	0.399	0.377	0.357	0.35	0.346	0.346	0.516
Test set												Test set												Test set
MSE	5.845	4.764	3.421	5.845	6.868	8.355	7.684	10.57	8.817	12.05		MSE	5.252	3.382	3.436	6.622	6.971	5.071	6.519	8.601	7.554	8.365		MSE	5.559	3.157	3.461	6.335	8.687	8.355	8.523	8.142	7.82	9.307
RMSE	2.418	2.183	1.85	2.418	2.621	2.891	2.772	3.251	2.969	3.471		RMSE	2.292	1.839	1.854	2.573	2.64	2.252	2.553	2.933	2.748	2.892		RMSE	2.358	1.777	1.86	2.517	2.947	2.891	2.919	2.853	2.796	3.051
MAE	1.219	1.245	1.145	1.609	1.761	1.624	1.744	1.864	1.663	2.064		MAE	1.203	1.257	1.212	1.636	1.789	1.519	1.694	1.813	1.638	2.005		MAE	1.215	1.235	1.162	1.629	1.828	1.624	1.758	1.799	1.677	1.971
MAPE	57.723	53.913	51.335	58.169	62.775	58.051	66.576	69.498	69.138	57.868		MAPE	55.327	52.541	55.38	63.594	63.694	54.38	64.409	70.155	68.054	54.858		MAPE	57.184	51.517	52.492	61.66	63.141	58.051	68.451	66.771	68.577	53.896
R²	0.334	0.319	0.318	0.291	0.321	0.339	0.336	0.314	0.351	0.388		R²	0.32	0.324	0.323	0.293	0.338	0.324	0.316	0.295	0.334	0.42		R²	0.332	0.286	0.329	0.303	0.34	0.339	0.323	0.297	0.347	0.402
TN	Random Forest												XGboost												Decision Tree
	1	2	3	4	5	6	7	8	9	10			1	2	3	4	5	6	7	8	9	10			1	2	3	4	5	6	7	8	9	10
1	0	0	0	0	0	0	0	0	0	0		1	0	0	0	0	0	0	0	0	0	0		1	0	0	0	0	0	0	0	0	0	0
2	0	0	0	0	0	0	0	0	0	0		2	0	0	0	0	0	0	0	0	0	0		2	0	0	0	0	0	0	0	0	0	0
3	0	0	0	0	0	0	0	0	0	0		3	0	0	0	0	0	0	0	0	0	0		3	0	0	0	0	0	0	0	0	0	0
4-1	0	0	0	0	0	0	0	0	0	0		4-1	0	0	0	0	0	0	0	0	0	0		4-1	0	0	0	0	0	0	0	0	0	0
4-2	0	0	0	0	0	0	0	0	0	0		4-2	0	0	0	0	0	0	0	0	0	0		4-2	0	0	0	0	0	0	0	0	0	0
4-3	0	0	0	0	0	0	0	0	0	0		4-3	0	0	0	0	0	0	0	0	0	0		4-3	0	0	0	0	0	0	0	0	0	0
4-4	0	0	0.007	0.017	0.007	0.002	0.002	0.036	0.039	0.087		4-4	0	0	0.01	0.005	0.007	0.004	0.001	0.291	0.046	0.099		4-4	0	0	0.005	0.012	0.022	0.002	0.005	0.262	0.049	0.072
A-1	0.01	0.001	0.076	0.011	0.005	0.021	0.002	0.09	0.018	0.01		A-1	0.004	0.001	0.133	0.007	0.007	0.017	0.003	0.229	0.018	0.011		A-1	0.009	0.001	0.165	0.006	0.008	0.018	0.002	0.142	0.017	0.005
A-2	0.011	0.027	0.01	0.019	0.032	0.015	0.035	0.033	0.026	0.025		A-2	0.012	0.018	0.02	0.019	0.04	0.018	0.041	0.019	0.023	0.003		A-2	0.008	0.027	0.019	0.013	0.049	0.029	0.056	0.03	0.023	0.001
A-3	0.189	0.001	0.003	0.105	0.036	0.054	0.126	0.122	0.112	0.069		A-3	0.23	0	0.004	0.263	0.044	0.069	0.133	0.076	0.103	0.081		A-3	0.025	0	0.008	0.202	0.034	0.059	0.124	0.069	0.07	0.113
A-4	0	0	0	0	0	0	0	0	0	0		A-4	0	0	0	0	0	0	0	0	0	0		A-4	0	0	0	0	0	0	0	0	0	0
B-1	0.044	0.037	0.083	0.057	0.037	0.101	0.087	0.062	0.143	0.037		B-1	0.048	0.037	0.104	0.074	0.042	0.092	0.122	0.027	0.148	0.026		B-1	0.126	0.054	0.096	0.068	0.044	0.074	0.077	0.029	0.128	0.03
B-2	0	0	0	0	0	0	0	0	0	0		B-2	0	0	0	0	0	0	0	0	0	0		B-2	0	0	0	0	0	0	0	0	0	0
B-3	0	0	0	0	0	0	0	0	0	0		B-3	0	0	0	0	0	0	0	0	0	0		B-3	0	0	0	0	0	0	0	0	0	0
B-4	0.111	0.028	0.037	0.176	0.032	0.095	0.062	0.063	0.206	0.045		B-4	0.099	0.035	0.044	0.08	0.028	0.053	0.047	0.039	0.17	0.041		B-4	0.049	0.027	0.053	0.19	0.035	0.126	0.066	0.051	0.204	0.035
B-5	0	0	0	0	0	0	0	0	0	0		B-5	0	0	0	0	0	0	0	0	0	0		B-5	0	0	0	0	0	0	0	0	0	0
B-6	0.001	0	0.004	0.053	0.027	0.015	0.003	0.036	0.033	0.012		B-6	0.001	0	0.005	0.064	0.059	0.028	0.003	0.021	0.013	0.007		B-6	0.001	0.001	0.002	0.08	0.037	0.025	0.002	0.014	0.022	0.011
B-7	0.102	0.162	0.061	0.22	0.075	0.079	0.042	0.061	0.029	0.053		B-7	0.219	0.214	0.048	0.113	0.091	0.087	0.04	0.065	0.038	0.064		B-7	0.223	0.207	0.037	0.116	0.089	0.068	0.047	0.091	0.029	0.056
C-1	0	0	0	0	0	0	0	0	0	0		C-1	0	0	0	0	0	0	0	0	0	0		C-1	0	0	0	0	0	0	0	0	0	0
C-2	0	0	0	0	0	0	0	0	0	0		C-2	0	0.001	0	0	0	0	0	0	0	0		C-2	0	0.001	0	0	0	0	0	0	0	0
C-3	0	0	0	0	0	0	0	0	0	0		C-3	0	0	0	0	0	0	0	0	0	0		C-3	0	0	0	0	0	0	0	0	0	0
C-4	0.193	0.144	0.229	0.088	0.251	0.263	0.296	0.14	0.053	0.042		C-4	0.114	0.128	0.293	0.094	0.206	0.309	0.259	0.071	0.092	0.072		C-4	0.171	0.143	0.26	0.079	0.199	0.244	0.306	0.104	0.117	0.064
C-5	0.02	0.001	0.001	0.031	0.101	0.006	0.008	0.016	0.005	0.114		C-5	0.018	0.001	0.003	0.026	0.065	0.003	0.004	0.009	0.004	0.119		C-5	0.019	0.003	0	0.029	0.085	0.006	0.005	0.011	0.009	0.089
C-6	0	0	0	0	0	0	0	0	0	0		C-6	0	0	0	0	0	0	0	0	0	0		C-6	0	0	0	0	0	0	0	0	0	0
C-7	0	0	0	0	0	0	0	0	0	0		C-7	0	0	0	0	0	0	0	0	0	0		C-7	0	0	0	0	0	0	0	0	0	0
D-1	0.14	0.245	0.045	0.037	0.149	0.064	0.035	0.044	0.064	0.134		D-1	0.116	0.201	0.039	0.051	0.165	0.048	0.024	0.022	0.058	0.184		D-1	0.152	0.207	0.034	0.039	0.17	0.061	0.032	0.034	0.057	0.214
D-2	0.008	0.001	0	0	0	0	0	0	0	0		D-2	0.004	0.001	0	0	0	0	0	0	0	0		D-2	0.01	0.001	0	0	0	0	0	0	0	0
D-3	0.06	0.002	0	0	0	0	0	0	0	0		D-3	0.02	0.001	0	0	0	0	0	0	0	0		D-3	0.06	0	0	0	0	0	0	0	0	0
D-4	0.028	0.13	0.065	0.043	0.067	0.05	0.069	0.061	0.042	0.061		D-4	0.016	0.125	0.057	0.058	0.053	0.047	0.08	0.036	0.059	0.08		D-4	0.03	0.13	0.055	0.047	0.071	0.07	0.07	0.043	0.046	0.073
D-5	0	0	0	0	0	0	0	0	0	0		D-5	0	0	0	0	0	0	0	0	0	0		D-5	0	0	0	0	0	0	0	0	0	0
D-6	0	0	0	0	0	0	0	0	0	0		D-6	0	0	0	0	0	0	0	0	0	0		D-6	0	0	0	0	0	0	0	0	0	0
E-1	0	0	0	0	0	0	0	0	0	0		E-1	0	0	0	0	0	0	0	0	0	0		E-1	0	0	0	0	0	0	0	0	0	0
E-2	0.014	0.058	0.053	0.068	0.076	0.074	0.052	0.067	0.036	0.068		E-2	0.017	0.072	0.065	0.07	0.094	0.09	0.075	0.041	0.055	0.051		E-2	0.027	0.05	0.055	0.058	0.079	0.069	0.046	0.041	0.066	0.055
E-3	0.014	0.039	0.073	0.044	0.059	0.097	0.105	0.064	0.13	0.017		E-3	0.016	0.036	0.041	0.053	0.058	0.039	0.081	0.022	0.056	0.033		E-3	0.024	0.028	0.05	0.027	0.042	0.059	0.062	0.043	0.058	0.027
F-1	0.054	0.126	0.253	0.03	0.044	0.064	0.076	0.103	0.065	0.226		F-1	0.066	0.129	0.134	0.022	0.043	0.098	0.085	0.032	0.118	0.129		F-1	0.067	0.119	0.161	0.035	0.036	0.09	0.101	0.035	0.105	0.156
F-2	0	0	0	0	0	0	0	0	0	0		F-2	0	0	0	0	0	0	0	0	0	0		F-2	0	0	0	0	0	0	0	0	0	0
F-3	0	0	0	0	0	0	0	0	0	0		F-3	0	0	0	0	0	0	0	0	0	0		F-3	0	0	0	0	0	0	0	0	0	0
Training set												Training set												Training set
MSE	0.064	0.073	0.076	0.145	0.082	0.1	0.156	0.09	0.122	0.122		MSE	0.063	0.107	0.073	0.131	0.085	0.102	0.152	0.129	0.131	0.135		MSE	0.074	0.092	0.087	0.132	0.081	0.112	0.154	0.137	0.137	0.131
RMSE	0.252	0.271	0.275	0.38	0.287	0.315	0.395	0.3	0.349	0.349		RMSE	0.25	0.327	0.271	0.362	0.291	0.319	0.39	0.359	0.362	0.367		RMSE	0.271	0.304	0.295	0.363	0.285	0.334	0.392	0.37	0.37	0.362
MAE	0.114	0.118	0.124	0.185	0.164	0.169	0.196	0.159	0.153	0.178		MAE	0.11	0.122	0.125	0.176	0.166	0.173	0.194	0.162	0.148	0.189		MAE	0.116	0.12	0.13	0.175	0.161	0.177	0.197	0.167	0.167	0.182
MAPE	86.752	93.499	93.555	91.317	91.689	86.488	96.914	95.197	96.25	87.587		MAPE	85.927	94.615	94.682	90.61	91.678	87.089	96.207	95.539	94.442	86.929		MAPE	86.349	94.317	94.517	90.25	92.107	87.642	97.516	95.843	95.843	87.341
R²	0.44	0.38	0.367	0.388	0.345	0.366	0.333	0.352	0.395	0.444		R²	0.413	0.351	0.367	0.381	0.344	0.361	0.334	0.399	0.387	0.457		R²	0.421	0.369	0.371	0.386	0.346	0.362	0.329	0.401	0.401	0.457
Test set												Test set												Test set
MSE	0.071	0.129	0.086	0.099	0.095	0.107	0.111	0.277	0.173	0.142		MSE	0.082	0.05	0.091	0.131	0.089	0.102	0.12	0.184	0.148	0.106		MSE	0.05	0.084	0.059	0.128	0.099	0.078	0.116	0.167	0.131	0.117
RMSE	0.267	0.359	0.293	0.314	0.309	0.327	0.333	0.527	0.416	0.376		RMSE	0.287	0.224	0.302	0.363	0.299	0.319	0.347	0.429	0.385	0.326		RMSE	0.224	0.29	0.243	0.358	0.315	0.28	0.34	0.409	0.363	0.343
MAE	0.115	0.124	0.131	0.174	0.168	0.187	0.192	0.177	0.164	0.199		MAE	0.123	0.119	0.132	0.184	0.167	0.175	0.194	0.176	0.171	0.187		MAE	0.113	0.12	0.122	0.183	0.17	0.171	0.189	0.169	0.158	0.196
MAPE	95.042	108.706	107.264	93.861	98.018	95.59	98.847	115.127	115.995	109.487		MAPE	100.291	103.262	102.986	102.526	94.348	95.977	103.434	110.434	121.543	96.354		MAPE	90.69	105.402	102.672	103.872	99.922	91.104	95.693	112.268	115.292	102.039
R²	0.318	0.291	0.327	0.293	0.319	0.31	0.282	0.32	0.287	0.307		R²	0.279	0.323	0.333	0.338	0.318	0.323	0.282	0.226	0.304	0.241		R²	0.281	0.281	0.301	0.332	0.307	0.311	0.3	0.188	0.33	0.255

## Sheet: SC2-f
NH3	Random Forest												Xgboost												Decision Tree
	1	2	3	4	5	6	7	8	9	10			1	2	3	4	5	6	7	8	9	10			1	2	3	4	5	6	7	8	9	10
1	0	0	0	0	0	0	0	0	0	0		1	0	0	0	0	0	0	0	0	0	0		1	0	0	0	0	0	0	0	0	0	0
2	0	0	0	0	0	0	0	0	0	0		2	0	0	0	0	0	0	0	0	0	0		2	0	0	0	0	0	0	0	0	0	0
3	0	0	0	0	0	0	0	0	0	0		3	0	0	0	0	0	0	0	0	0	0		3	0	0	0	0	0	0	0	0	0	0
4-1	0	0	0	0	0	0	0	0	0	0		4-1	0	0	0	0	0	0	0	0	0	0		4-1	0	0	0	0	0	0	0	0	0	0
4-2	0	0	0	0	0	0	0	0	0	0		4-2	0	0	0	0	0	0	0	0	0	0		4-2	0	0	0	0	0	0	0	0	0	0
4-3	0	0	0	0	0	0	0	0	0	0		4-3	0	0	0	0	0	0	0	0	0	0		4-3	0	0	0	0	0	0	0	0	0	0
4-4	0.111	0.058	0.005	0.008	0	0	0.016	0.01	0.006	0		4-4	0.085	0.037	0.003	0.01	0	0	0.013	0.006	0.004	0		4-4	0.069	0.054	0.008	0.013	0	0	0.008	0.004	0.004	0
A-1	0.012	0.065	0.015	0.001	0	0.006	0.006	0.005	0.002	0		A-1	0.014	0.055	0.019	0	0	0.003	0.01	0.009	0.003	0		A-1	0.013	0.051	0.015	0.001	0	0.005	0.008	0.006	0.002	0
A-2	0.006	0.067	0.069	0.038	0.018	0.023	0.026	0.016	0.026	0.017		A-2	0.005	0.029	0.145	0.03	0.024	0.02	0.025	0.037	0.056	0.018		A-2	0.009	0.112	0.124	0.037	0.025	0.035	0.026	0.025	0.038	0.011
A-3	0.085	0.095	0.079	0.055	0	0.076	0.084	0.093	0.054	0.016		A-3	0.089	0.1	0.057	0.079	0	0.082	0.095	0.083	0.112	0.013		A-3	0.074	0.065	0.069	0.056	0	0.043	0.067	0.061	0.039	0.012
A-4	0	0	0	0	0	0	0	0	0	0		A-4	0	0	0	0	0	0	0	0	0	0		A-4	0	0	0	0	0	0	0	0	0	0
B-1	0.037	0.081	0.057	0.064	0.076	0.043	0.046	0.056	0.045	0.092		B-1	0.047	0.109	0.044	0.119	0.066	0.038	0.044	0.063	0.051	0.083		B-1	0.034	0.079	0.05	0.074	0.066	0.041	0.042	0.063	0.049	0.089
B-2	0	0	0	0	0	0	0	0	0	0		B-2	0	0	0	0	0	0	0	0	0	0		B-2	0	0	0	0	0	0	0	0	0	0
B-3	0	0	0	0	0	0	0	0	0	0		B-3	0	0	0	0	0	0	0	0	0	0		B-3	0	0	0	0	0	0	0	0	0	0
B-4	0.035	0.073	0.037	0.047	0.096	0.034	0.035	0.058	0.036	0.113		B-4	0.038	0.079	0.048	0.038	0.073	0.034	0.034	0.063	0.045	0.037		B-4	0.036	0.142	0.051	0.055	0.084	0.031	0.07	0.061	0.038	0.111
B-5	0	0	0	0	0	0	0	0	0	0		B-5	0	0	0	0	0	0	0	0	0	0		B-5	0	0	0	0	0	0	0	0	0	0
B-6	0.013	0.036	0.005	0.001	0	0	0.005	0.01	0.021	0.001		B-6	0.009	0.016	0.004	0.001	0	0	0.007	0.018	0.006	0.003		B-6	0.011	0.036	0.007	0.001	0	0	0.01	0.015	0.013	0.003
B-7	0.089	0.077	0.05	0.067	0.201	0.1	0.072	0.111	0.187	0.061		B-7	0.052	0.103	0.035	0.086	0.156	0.103	0.096	0.048	0.12	0.118		B-7	0.086	0.088	0.04	0.065	0.177	0.131	0.058	0.09	0.148	0.104
C-1	0	0	0	0	0	0	0	0	0	0		C-1	0	0	0	0	0	0	0	0	0	0		C-1	0	0	0	0	0	0	0	0	0	0
C-2	0	0	0	0	0	0	0	0	0	0		C-2	0	0	0	0	0	0	0	0	0	0		C-2	0	0	0	0	0	0	0	0	0	0
C-3	0	0	0	0	0	0	0	0	0	0		C-3	0	0	0	0	0	0	0	0	0	0		C-3	0	0	0	0	0	0	0	0	0	0
C-4	0.07	0.096	0.173	0.406	0.104	0.491	0.088	0.349	0.32	0.348		C-4	0.056	0.089	0.216	0.371	0.097	0.526	0.063	0.338	0.345	0.309		C-4	0.064	0.053	0.19	0.425	0.067	0.506	0.114	0.338	0.417	0.27
C-5	0.102	0.046	0.059	0.008	0	0.003	0.001	0.013	0.002	0.002		C-5	0.091	0.04	0.064	0.005	0	0.001	0.001	0.006	0.001	0.001		C-5	0.127	0.042	0.088	0.007	0	0.001	0.003	0.007	0	0.007
C-6	0	0	0	0	0	0	0	0	0	0		C-6	0	0	0	0	0	0	0	0	0	0		C-6	0	0	0	0	0	0	0	0	0	0
C-7	0	0	0	0	0	0	0	0	0	0		C-7	0	0	0	0	0	0	0	0	0	0		C-7	0	0	0	0	0	0	0	0	0	0
D-1	0.114	0.115	0.129	0.066	0.111	0.03	0.072	0.045	0.05	0.099		D-1	0.173	0.098	0.116	0.046	0.173	0.04	0.066	0.052	0.046	0.077		D-1	0.124	0.111	0.104	0.049	0.14	0.032	0.065	0.06	0.063	0.121
D-2	0	0	0.01	0	0	0	0	0	0	0		D-2	0	0	0.008	0	0	0	0	0	0	0		D-2	0	0	0.015	0	0	0	0	0	0	0
D-3	0	0	0.03	0	0	0	0	0	0	0		D-3	0	0	0.021	0	0	0	0	0	0	0		D-3	0	0	0.028	0	0	0	0	0	0	0
D-4	0.078	0.048	0.098	0.054	0.071	0.054	0.054	0.075	0.091	0.085		D-4	0.086	0.041	0.073	0.064	0.069	0.04	0.041	0.091	0.096	0.077		D-4	0.077	0.045	0.069	0.071	0.074	0.048	0.041	0.096	0.037	0.066
D-5	0	0	0	0	0	0	0	0	0	0		D-5	0	0	0	0	0	0	0	0	0	0		D-5	0	0	0	0	0	0	0	0	0	0
D-6	0	0	0	0	0	0	0	0	0	0		D-6	0	0	0	0	0	0	0	0	0	0		D-6	0	0	0	0	0	0	0	0	0	0
E-1	0	0	0	0	0	0	0	0	0	0		E-1	0	0	0	0	0	0	0	0	0	0		E-1	0	0	0	0	0	0	0	0	0	0
E-2	0.072	0.026	0.063	0.049	0.184	0.045	0.426	0.065	0.051	0.073		E-2	0.046	0.038	0.052	0.051	0.238	0.043	0.423	0.075	0.046	0.095		E-2	0.063	0.037	0.049	0.056	0.227	0.049	0.38	0.071	0.044	0.084
E-3	0.028	0.073	0.057	0.041	0.048	0.061	0.018	0.046	0.045	0.033		E-3	0.019	0.122	0.032	0.032	0.042	0.034	0.024	0.044	0.025	0.045		E-3	0.037	0.051	0.044	0.038	0.049	0.05	0.028	0.039	0.037	0.04
F-1	0.149	0.045	0.063	0.093	0.092	0.033	0.054	0.047	0.064	0.061		F-1	0.188	0.044	0.062	0.069	0.063	0.036	0.057	0.067	0.044	0.124		F-1	0.177	0.034	0.049	0.052	0.09	0.029	0.081	0.065	0.071	0.081
F-2	0	0	0	0	0	0	0	0	0	0		F-2	0	0	0	0	0	0	0	0	0	0		F-2	0	0	0	0	0	0	0	0	0	0
F-3	0	0	0	0	0	0	0	0	0	0		F-3	0	0	0	0	0	0	0	0	0	0		F-3	0	0	0	0	0	0	0	0	0	0
Training set												Training set												Training set
MSE	0.125	0.201	3.564	8.659	5.679	3.897	6.332	6.324	11.09	2.817		MSE	0.117	0.168	3.828	9.315	5.095	3.943	6.96	6.494	12.154	3.477		MSE	0.116	0.156	3.39	9.468	5.656	3.915	6.842	6.256	11.647	3.228
RMSE	0.353	0.448	1.888	2.943	2.383	1.974	2.516	2.515	3.33	1.678		RMSE	0.341	0.41	1.957	3.052	2.257	1.986	2.638	2.548	3.486	1.865		RMSE	0.341	0.395	1.841	3.077	2.378	1.979	2.616	2.501	3.413	1.797
MAE	0.181	0.155	1.125	1.745	1.329	1.376	1.681	1.662	1.833	1.045		MAE	0.175	0.148	1.103	1.812	1.322	1.38	1.729	1.657	1.87	1.07		MAE	0.172	0.143	1.112	1.793	1.33	1.37	1.689	1.665	1.838	1.05
MAPE	87.183	93.869	49.059	63.762	50.956	56.034	59.456	57.851	66.509	47.897		MAPE	86.272	93.252	47.949	63.751	51.312	56.125	59.684	58.159	66.914	48.489		MAPE	86.249	92.862	48.765	64.619	51.386	56.374	59.089	57.936	66.306	48.161
R²	0.44	0.406	0.46	0.343	0.36	0.377	0.378	0.373	0.334	0.359		R²	0.464	0.4	0.463	0.353	0.363	0.368	0.373	0.367	0.332	0.339		R²	0.443	0.42	0.47	0.342	0.358	0.367	0.368	0.371	0.335	0.357
Test set												Test set												Test set
MSE	0.105	0.226	4.58	9.724	3.596	4.381	8.183	6.879	12.822	4.727		MSE	0.125	0.309	3.887	8.304	5.018	4.249	6.722	6.392	10.313	3.181		MSE	0.128	0.342	4.882	7.838	3.649	4.322	7.014	6.941	11.444	3.739
RMSE	0.324	0.476	2.14	3.118	1.896	2.093	2.861	2.623	3.581	2.174		RMSE	0.354	0.556	1.972	2.882	2.24	2.061	2.593	2.528	3.211	1.783		RMSE	0.358	0.585	2.209	2.8	1.91	2.079	2.648	2.635	3.383	1.934
MAE	0.183	0.163	1.155	1.837	1.364	1.421	1.797	1.685	1.906	1.113		MAE	0.195	0.17	1.195	1.813	1.357	1.417	1.742	1.677	1.872	1.093		MAE	0.195	0.175	1.187	1.763	1.325	1.427	1.804	1.664	1.908	1.141
MAPE	97.364	117.776	52.448	67.045	53.292	59.4	63.959	60.135	69.672	53.956		MAPE	108.924	120.967	54.12	65.556	53.623	58.458	61.161	59.066	67.763	50.598		MAPE	105.745	130.451	52.167	64.851	53.143	58.937	63.754	59.258	69.217	53.752
R²	0.321	0.291	0.374	0.322	0.257	0.315	0.335	0.314	0.312	0.282		R²	0.252	0.311	0.368	0.273	0.268	0.34	0.341	0.339	0.317	0.3		R²	0.31	0.278	0.381	0.319	0.27	0.342	0.35	0.333	0.315	0.273
TN	Random Forest												XGboost												Decision Tree
	1	2	3	4	5	6	7	8	9	10			1	2	3	4	5	6	7	8	9	10			1	2	3	4	5	6	7	8	9	10
1	0	0	0	0	0	0	0	0	0	0		1	0	0	0	0	0	0	0	0	0	0		1	0	0	0	0	0	0	0	0	0	0
2	0	0	0	0	0	0	0	0	0	0		2	0	0	0	0	0	0	0	0	0	0		2	0	0	0	0	0	0	0	0	0	0
3	0	0	0	0	0	0	0	0	0	0		3	0	0	0	0	0	0	0	0	0	0		3	0	0	0	0	0	0	0	0	0	0
4-1	0	0	0	0	0	0	0	0	0	0		4-1	0	0	0	0	0	0	0	0	0	0		4-1	0	0	0	0	0	0	0	0	0	0
4-2	0	0	0	0	0	0	0	0	0	0		4-2	0	0	0	0	0	0	0	0	0	0		4-2	0	0	0	0	0	0	0	0	0	0
4-3	0	0	0	0	0	0	0	0	0	0		4-3	0	0	0	0	0	0	0	0	0	0		4-3	0	0	0	0	0	0	0	0	0	0
4-4	0.019	0.013	0.007	0.002	0	0	0.007	0.003	0.01	0		4-4	0.02	0.023	0.018	0.001	0	0	0.005	0.003	0.02	0		4-4	0.021	0.02	0.007	0.001	0	0	0.007	0.002	0.006	0
A-1	0.07	0.075	0.013	0.001	0	0.003	0.001	0.004	0.002	0		A-1	0.179	0.08	0.015	0	0	0.002	0.002	0.003	0.003	0		A-1	0.099	0.06	0.019	0	0	0.007	0.002	0.005	0.003	0
A-2	0.008	0.039	0.062	0.023	0.011	0.023	0.026	0.026	0.018	0.008		A-2	0.008	0.038	0.081	0.017	0.015	0.019	0.016	0.024	0.026	0.012		A-2	0.005	0.032	0.066	0.022	0.015	0.019	0.018	0.017	0.023	0.009
A-3	0.063	0.096	0.163	0.078	0	0.087	0.109	0.064	0.107	0.002		A-3	0.044	0.088	0.02	0.064	0	0.064	0.07	0.041	0.088	0.002		A-3	0.069	0.068	0.18	0.05	0	0.048	0.075	0.053	0.098	0.001
A-4	0	0	0	0	0	0	0	0	0	0		A-4	0	0	0	0	0	0	0	0	0	0		A-4	0	0	0	0	0	0	0	0	0	0
B-1	0.038	0.083	0.017	0.071	0.085	0.064	0.117	0.045	0.064	0.046		B-1	0.032	0.088	0.014	0.064	0.104	0.081	0.08	0.061	0.055	0.077		B-1	0.039	0.145	0.017	0.067	0.093	0.058	0.078	0.052	0.054	0.052
B-2	0	0	0	0	0	0	0	0	0	0		B-2	0	0	0	0	0	0	0	0	0	0		B-2	0	0	0	0	0	0	0	0	0	0
B-3	0	0	0	0	0	0	0	0	0	0		B-3	0	0	0	0	0	0	0	0	0	0		B-3	0	0	0	0	0	0	0	0	0	0
B-4	0.037	0.032	0.16	0.166	0.047	0.157	0.037	0.179	0.084	0.03		B-4	0.028	0.037	0.162	0.081	0.037	0.112	0.064	0.135	0.066	0.025		B-4	0.03	0.029	0.117	0.128	0.041	0.097	0.051	0.11	0.077	0.025
B-5	0	0	0	0	0	0	0	0	0	0		B-5	0	0	0	0	0	0	0	0	0	0		B-5	0	0	0	0	0	0	0	0	0	0
B-6	0.003	0.013	0.044	0.003	0	0	0.01	0.007	0.034	0		B-6	0.002	0.013	0.067	0.008	0	0	0.011	0.006	0.037	0		B-6	0.004	0.019	0.075	0.006	0	0	0.017	0.005	0.017	0.003
B-7	0.071	0.081	0.088	0.064	0.088	0.059	0.125	0.125	0.053	0.161		B-7	0.051	0.081	0.056	0.053	0.105	0.096	0.079	0.101	0.047	0.118		B-7	0.063	0.138	0.052	0.06	0.109	0.064	0.161	0.136	0.048	0.186
C-1	0	0	0	0	0	0	0	0	0	0		C-1	0	0	0	0	0	0	0	0	0	0		C-1	0	0	0	0	0	0	0	0	0	0
C-2	0	0	0	0	0	0	0	0	0	0		C-2	0	0	0	0	0	0	0	0	0	0		C-2	0	0	0	0	0	0	0	0	0	0
C-3	0	0	0	0	0	0	0	0	0	0		C-3	0	0	0	0	0	0	0	0	0	0		C-3	0	0	0	0	0	0	0	0	0	0
C-4	0.103	0.054	0.136	0.155	0.274	0.221	0.125	0.187	0.119	0.221		C-4	0.062	0.039	0.179	0.227	0.22	0.154	0.178	0.256	0.159	0.188		C-4	0.107	0.045	0.141	0.184	0.234	0.23	0.124	0.273	0.162	0.229
C-5	0.057	0.092	0.011	0.006	0	0.003	0.003	0.007	0.003	0		C-5	0.048	0.09	0.015	0.007	0	0.002	0.001	0.007	0.007	0		C-5	0.066	0.086	0.015	0.004	0	0.004	0.001	0.005	0.005	0
C-6	0	0	0	0	0	0	0	0	0	0		C-6	0	0	0	0	0	0	0	0	0	0		C-6	0	0	0	0	0	0	0	0	0	0
C-7	0	0	0	0	0	0	0	0	0	0		C-7	0	0	0	0	0	0	0	0	0	0		C-7	0	0	0	0	0	0	0	0	0	0
D-1	0.22	0.099	0.114	0.063	0.129	0.12	0.102	0.062	0.072	0.18		D-1	0.122	0.116	0.127	0.063	0.146	0.08	0.107	0.069	0.034	0.189		D-1	0.184	0.103	0.129	0.059	0.129	0.067	0.104	0.064	0.062	0.142
D-2	0	0	0.005	0	0	0	0	0	0	0		D-2	0	0	0.011	0	0	0	0	0	0	0		D-2	0	0	0.004	0	0	0	0	0	0	0
D-3	0	0	0.047	0	0	0	0	0	0	0		D-3	0	0	0.084	0	0	0	0	0	0	0		D-3	0	0	0.045	0	0	0	0	0	0	0
D-4	0.084	0.159	0.045	0.068	0.097	0.136	0.086	0.049	0.081	0.147		D-4	0.072	0.156	0.046	0.095	0.099	0.157	0.124	0.063	0.129	0.091		D-4	0.088	0.107	0.05	0.084	0.115	0.132	0.082	0.047	0.139	0.148
D-5	0	0	0	0	0	0	0	0	0	0		D-5	0	0	0	0	0	0	0	0	0	0		D-5	0	0	0	0	0	0	0	0	0	0
D-6	0	0	0	0	0	0	0	0	0	0		D-6	0	0	0	0	0	0	0	0	0	0		D-6	0	0	0	0	0	0	0	0	0	0
E-1	0	0	0	0	0	0	0	0	0	0		E-1	0	0	0	0	0	0	0	0	0	0		E-1	0	0	0	0	0	0	0	0	0	0
E-2	0.05	0.082	0.049	0.053	0.084	0.045	0.12	0.058	0.066	0.099		E-2	0.087	0.07	0.057	0.104	0.086	0.047	0.112	0.055	0.053	0.08		E-2	0.062	0.073	0.032	0.095	0.064	0.069	0.149	0.066	0.06	0.084
E-3	0.115	0.031	0.012	0.046	0.069	0.031	0.059	0.106	0.11	0.019		E-3	0.098	0.03	0.018	0.037	0.061	0.059	0.072	0.103	0.158	0.028		E-3	0.115	0.033	0.016	0.04	0.067	0.051	0.082	0.085	0.097	0.018
F-1	0.061	0.051	0.027	0.202	0.116	0.05	0.075	0.077	0.177	0.087		F-1	0.147	0.052	0.032	0.18	0.128	0.125	0.08	0.073	0.119	0.19		F-1	0.046	0.042	0.034	0.199	0.133	0.154	0.048	0.081	0.148	0.103
F-2	0	0	0	0	0	0	0	0	0	0		F-2	0	0	0	0	0	0	0	0	0	0		F-2	0	0	0	0	0	0	0	0	0	0
F-3	0	0	0	0	0	0	0	0	0	0		F-3	0	0	0	0	0	0	0	0	0	0		F-3	0	0	0	0	0	0	0	0	0	0
Training set												Training set												Training set
MSE	10.4	4.497	0.062	0.101	0.1	0.088	0.099	0.122	0.099	0.075		MSE	9.496	4.522	0.054	0.089	0.101	0.114	0.084	0.142	0.106	0.066		MSE	10.428	4.13	0.051	0.113	0.089	0.107	0.11	0.137	0.106	0.07
RMSE	3.225	2.121	0.25	0.318	0.317	0.296	0.315	0.35	0.314	0.274		RMSE	3.082	2.126	0.232	0.298	0.319	0.338	0.29	0.377	0.326	0.256		RMSE	3.229	2.032	0.227	0.335	0.298	0.328	0.331	0.37	0.326	0.265
MAE	2.044	1.385	0.113	0.174	0.139	0.147	0.161	0.194	0.166	0.123		MAE	1.98	1.395	0.106	0.168	0.143	0.16	0.165	0.195	0.173	0.117		MAE	2.02	1.325	0.106	0.182	0.139	0.152	0.169	0.195	0.173	0.117
MAPE	53.496	62.315	83.549	89.338	98.026	94.544	92.607	92.591	97.028	89.97		MAPE	52.709	61.224	82.618	89.241	99.796	96.863	94.17	92.441	97.69	90.125		MAPE	53.248	61.461	82.078	90.212	98.681	96.346	93.226	92.695	97.69	88.84
R²	0.511	0.44	0.478	0.362	0.346	0.344	0.343	0.357	0.345	0.389		R²	0.521	0.447	0.468	0.359	0.341	0.346	0.342	0.359	0.343	0.371		R²	0.517	0.458	0.504	0.357	0.352	0.351	0.337	0.357	0.343	0.381
Test set												Test set												Test set
MSE	9.857	4.171	0.05	0.096	0.104	0.123	0.125	0.15	0.102	0.051		MSE	12.447	4.122	0.075	0.124	0.1	0.061	0.16	0.102	0.084	0.072		MSE	9.963	5.159	0.076	0.069	0.131	0.076	0.1	0.114	0.084	0.062
RMSE	3.14	2.042	0.224	0.31	0.322	0.35	0.353	0.387	0.319	0.227		RMSE	3.528	2.03	0.273	0.352	0.317	0.247	0.4	0.32	0.29	0.269		RMSE	3.156	2.271	0.275	0.263	0.362	0.276	0.317	0.337	0.29	0.249
MAE	2.068	1.384	0.105	0.178	0.143	0.163	0.184	0.198	0.17	0.114		MAE	2.119	1.409	0.116	0.182	0.14	0.148	0.178	0.196	0.164	0.118		MAE	2.123	1.487	0.113	0.168	0.141	0.157	0.175	0.195	0.164	0.12
MAPE	56.011	65.64	88.509	96.71	114.911	111.862	112.585	98.864	104.245	95.492		MAPE	59.435	65.829	93.349	102.156	106.475	95.434	105.085	97.071	96.519	96.058		MAPE	57.925	70.28	95.485	90.758	114.694	103.345	103.019	97.407	96.519	102.444
R²	0.42	0.354	0.304	0.293	0.283	0.319	0.302	0.324	0.305	0.262		R²	0.378	0.322	0.325	0.31	0.297	0.288	0.311	0.318	0.298	0.352		R²	0.385	0.297	0.319	0.277	0.284	0.288	0.318	0.326	0.298	0.321

## Sheet: SC3-a
kg m-2 s-1	Release from tree tiles		Release from grass tiles		Urban domestic water		Release from litter		Loss to subsurface runoff		N loss from terrestrial respiration		N added for cropland fertilisation		Soil loss		Mass flux into atmosphere		Dry and wet deposition		Biological nitrogen fixation
	Median	Standard deviation	Median	Standard deviation	Median	Standard deviation	Median	Standard deviation	Median	Standard deviation	Median	Standard deviation	Median	Standard deviation	Median	Standard deviation	Median	Standard deviation	Median	Standard deviation	Median	Standard deviation
2015	1.88622e-09	1.0442e-09	6.64178e-11	2.07537e-11	8.48723e-09	2.27198e-10	1.12554e-09	1.32999e-09	3.87693e-12	2.42196e-13	2.12085e-08	7.94499e-09	2.01758e-11	1.07804e-11	1.48022e-11	7.06873e-12	7.11878e-10	3.32063e-10	1.83885e-13	3.90259e-15	2.48202e-13	1.89975e-13
2016	1.96119e-09	1.07893e-09	6.66312e-11	2.04743e-11	8.5687e-09	2.37085e-10	7.90324e-10	6.14885e-10	3.6691e-12	1.86182e-13	2.13525e-08	7.98614e-09	1.99646e-11	1.00097e-11	1.52025e-11	7.29095e-12	7.22273e-10	3.42127e-10	1.81144e-13	3.68775e-15	1.99998e-13	1.11428e-13
2017	1.96313e-09	1.02125e-09	6.66229e-11	2.04851e-11	8.52616e-09	2.27634e-10	7.48704e-10	5.77732e-10	3.63829e-12	1.78577e-13	2.1248e-08	7.66961e-09	1.91183e-11	8.75951e-12	1.56407e-11	7.51704e-12	7.34029e-10	3.49004e-10	1.78403e-13	3.47331e-15	1.99617e-13	1.18353e-13
2018	1.98788e-09	1.05984e-09	6.62331e-11	2.04894e-11	8.52479e-09	2.24464e-10	7.54889e-10	5.89337e-10	3.53092e-12	1.16637e-13	2.0845e-08	8.09442e-09	1.97671e-11	9.29129e-12	1.49948e-11	7.23016e-12	6.98596e-10	3.5669e-10	1.75662e-13	3.2593e-15	2.1658e-13	1.10635e-13
2019	2.06156e-09	1.23659e-09	6.8147e-11	1.97964e-11	8.47871e-09	2.23411e-10	8.99891e-10	5.70414e-10	3.3791e-12	2.43431e-13	2.31552e-08	7.9588e-09	2.32297e-11	1.09311e-11	1.70295e-11	7.7912e-12	8.00184e-10	3.37207e-10	1.73073e-13	3.27679e-15	1.80412e-13	1.08607e-13
2020	1.98788e-09	1.05984e-09	6.54465e-11	2.05103e-11	8.55009e-09	2.37344e-10	2.26895e-09	3.27349e-09	3.26011e-12	1.4676e-13	2.16069e-08	7.91694e-09	2.05883e-11	1.06186e-11	1.5188e-11	7.41634e-12	7.52259e-10	3.33469e-10	1.7018e-13	2.83298e-15	2.28288e-13	1.14453e-13
2021	2.06156e-09	1.23659e-09	6.50531e-11	2.05225e-11	8.54348e-09	2.27258e-10	7.84014e-10	6.0195e-10	3.1841e-12	1.50951e-13	2.16109e-08	8.54152e-09	2.30415e-11	1.39775e-11	1.60794e-11	7.81599e-12	7.19155e-10	3.43039e-10	1.65735e-13	2.65922e-15	2.11217e-13	8.62295e-14
2022	2.09741e-09	1.16534e-09	6.46657e-11	2.05281e-11	8.55021e-09	2.33349e-10	7.41204e-10	5.69893e-10	3.1361e-12	2.06724e-13	2.23204e-08	8.28544e-09	2.32227e-11	1.25541e-11	1.59643e-11	7.75421e-12	7.48508e-10	3.61644e-10	1.61289e-13	2.48622e-15	3.0458e-13	1.21021e-13
2023	1.93764e-09	1.06589e-09	6.41095e-11	2.06214e-11	8.57486e-09	2.26433e-10	9.09717e-10	6.82275e-10	3.08625e-12	1.76177e-13	2.17307e-08	8.24012e-09	2.06904e-11	1.05297e-11	1.64657e-11	7.29572e-12	7.52289e-10	3.56095e-10	1.56844e-13	2.31413e-15	3.50874e-13	2.33589e-13
2024	2.03497e-09	1.12348e-09	6.355e-11	2.07203e-11	8.61122e-09	2.30918e-10	1.13783e-09	1.19505e-09	3.05004e-12	2.04869e-13	2.20109e-08	8.44396e-09	2.1196e-11	1.18551e-11	1.59666e-11	7.9734e-12	7.3938e-10	3.59255e-10	1.52398e-13	2.14317e-15	9.37115e-13	4.86215e-13
2025	2.0511e-09	1.09991e-09	6.29905e-11	2.08203e-11	8.59464e-09	2.46952e-10	1.27943e-09	1.5316e-09	3.05367e-12	1.7414e-13	2.26414e-08	8.39067e-09	2.27056e-11	1.24299e-11	1.52012e-11	7.30439e-12	7.40971e-10	3.2882e-10	1.47953e-13	1.97362e-15	5.93217e-13	2.16397e-13
2026	1.98286e-09	1.07929e-09	6.2431e-11	2.09215e-11	8.61118e-09	2.3091e-10	9.19544e-10	8.28625e-10	3.05881e-12	1.30809e-13	2.2119e-08	8.3665e-09	2.1595e-11	1.18351e-11	1.54876e-11	7.67821e-12	7.4809e-10	3.34548e-10	1.43507e-13	1.80589e-15	4.06394e-13	1.24836e-13
2027	2.04705e-09	1.1256e-09	6.18701e-11	2.10256e-11	8.61051e-09	2.36974e-10	1.30251e-09	1.61573e-09	3.0179e-12	1.38896e-13	2.24791e-08	8.36763e-09	2.07291e-11	1.04863e-11	1.58504e-11	7.19968e-12	7.7748e-10	3.47666e-10	1.39062e-13	1.64054e-15	2.77036e-13	1.22839e-13
2028	2.12807e-09	1.19944e-09	6.13849e-11	2.09283e-11	8.65604e-09	2.41016e-10	7.8159e-10	5.59681e-10	2.99136e-12	1.80345e-13	2.28809e-08	8.88129e-09	2.45689e-11	1.3145e-11	1.62134e-11	7.47123e-12	7.22426e-10	3.56781e-10	1.34616e-13	1.47836e-15	2.99973e-13	1.26848e-13
2029	2.16392e-09	1.18057e-09	6.09003e-11	2.08312e-11	8.68385e-09	2.41774e-10	1.16047e-09	1.3256e-09	3.00954e-12	1.40504e-13	2.30389e-08	8.54405e-09	2.53667e-11	1.4766e-11	1.57393e-11	7.49822e-12	7.41421e-10	3.62945e-10	1.30171e-13	1.32052e-15	3.79095e-13	1.25453e-13
2030	2.04424e-09	1.04754e-09	6.04157e-11	2.07347e-11	8.65585e-09	2.57335e-10	1.29586e-09	1.63117e-09	3.02437e-12	1.65062e-13	2.30738e-08	8.37021e-09	2.24333e-11	1.24711e-11	1.66643e-11	8.15307e-12	7.80086e-10	3.49249e-10	1.25725e-13	1.16875e-15	3.35072e-13	1.41142e-13
2031	2.09456e-09	1.05709e-09	5.9931e-11	2.06391e-11	8.69984e-09	2.25439e-10	8.37527e-10	6.38803e-10	2.93613e-12	1.81013e-13	2.31104e-08	8.41786e-09	2.26991e-11	1.28302e-11	1.6989e-11	8.6043e-12	7.64638e-10	3.42375e-10	1.23339e-13	1.09395e-15	4.29322e-13	1.329e-13
2032	2.05659e-09	1.09747e-09	5.94466e-11	2.05439e-11	8.71694e-09	2.41871e-10	7.46652e-10	5.56501e-10	2.94645e-12	1.85043e-13	2.31703e-08	8.65702e-09	2.3498e-11	1.3293e-11	1.61875e-11	7.42771e-12	7.40008e-10	3.30578e-10	1.20952e-13	1.02249e-15	4.13943e-13	1.7841e-13
2033	2.1054e-09	1.0663e-09	5.90917e-11	2.05059e-11	8.74486e-09	2.28789e-10	8.337e-10	6.52595e-10	2.96787e-12	1.59206e-13	2.35743e-08	8.61651e-09	2.43495e-11	1.42267e-11	1.68991e-11	7.76893e-12	8.06311e-10	3.56979e-10	1.18566e-13	9.55167e-16	3.18617e-13	1.13618e-13
2034	2.18768e-09	1.22822e-09	5.87415e-11	2.04627e-11	8.72607e-09	2.46923e-10	8.69554e-10	6.29144e-10	2.97362e-12	1.5165e-13	2.36279e-08	8.84267e-09	2.31865e-11	1.30849e-11	1.69985e-11	7.72338e-12	8.23003e-10	3.57261e-10	1.16179e-13	8.92904e-16	3.12881e-13	1.13157e-13
2035	2.24506e-09	1.16585e-09	5.83912e-11	2.04199e-11	8.71949e-09	2.55945e-10	2.00616e-09	2.50659e-09	2.9786e-12	1.23096e-13	2.43789e-08	9.03242e-09	2.73467e-11	1.68696e-11	1.63922e-11	8.22736e-12	7.50956e-10	3.31505e-10	1.13793e-13	8.36837e-16	2.9042e-13	1.61895e-13
2036	2.17721e-09	1.03316e-09	5.80409e-11	2.03777e-11	8.72917e-09	2.38285e-10	7.90557e-10	5.85957e-10	3.021e-12	1.43902e-13	2.40678e-08	8.65441e-09	2.44658e-11	1.28178e-11	1.62769e-11	8.11396e-12	7.80704e-10	3.5164e-10	1.11406e-13	7.88289e-16	2.30409e-13	1.41123e-13
2037	2.13141e-09	1.14087e-09	5.76922e-11	2.0334e-11	8.75935e-09	2.37331e-10	7.83338e-10	5.85628e-10	3.02832e-12	1.72707e-13	2.39212e-08	8.81207e-09	2.41588e-11	1.31163e-11	1.69759e-11	7.41238e-12	7.68738e-10	3.39657e-10	1.0902e-13	7.48724e-16	2.21726e-13	1.19313e-13
2038	2.10154e-09	1.05765e-09	5.74457e-11	2.02047e-11	8.76733e-09	2.41543e-10	9.74815e-10	8.28809e-10	3.05583e-12	1.29465e-13	2.38551e-08	8.51333e-09	2.1667e-11	1.13595e-11	1.6583e-11	7.74276e-12	8.24192e-10	3.54084e-10	1.06633e-13	7.19626e-16	2.7185e-13	1.12916e-13
2039	2.06739e-09	1.16851e-09	5.72019e-11	2.00732e-11	8.75e-09	2.43123e-10	1.70067e-09	2.13672e-09	3.08821e-12	1.15362e-13	2.43408e-08	9.03797e-09	2.49446e-11	1.46361e-11	1.66864e-11	7.93187e-12	7.73881e-10	3.45921e-10	1.04247e-13	7.02296e-16	2.47101e-13	1.66663e-13
2040	2.16479e-09	1.12582e-09	5.69581e-11	1.99426e-11	8.73179e-09	2.47521e-10	8.09745e-10	6.0857e-10	3.06046e-12	1.11384e-13	2.42651e-08	8.87692e-09	2.34951e-11	1.20361e-11	1.75377e-11	8.31947e-12	7.86932e-10	3.56015e-10	1.01861e-13	6.97609e-16	2.38975e-13	1.5021e-13
2041	2.12705e-09	1.15739e-09	5.67143e-11	1.9813e-11	8.81363e-09	2.28655e-10	8.58403e-10	7.20007e-10	3.03139e-12	1.32713e-13	2.46635e-08	9.06836e-09	2.50307e-11	1.43222e-11	1.70607e-11	8.14795e-12	7.92851e-10	3.44966e-10	9.96693e-14	7.00723e-16	4.0543e-13	1.73087e-13
2042	2.02896e-09	1.12634e-09	5.64691e-11	1.96862e-11	8.77152e-09	2.57658e-10	8.41831e-10	6.42612e-10	3.04279e-12	1.24019e-13	2.47433e-08	8.9068e-09	2.5341e-11	1.29808e-11	1.66858e-11	7.94509e-12	7.77568e-10	3.72408e-10	9.74781e-14	7.08609e-16	1.84747e-13	1.46914e-13
2043	2.18463e-09	1.07497e-09	5.60654e-11	1.96385e-11	8.75467e-09	2.41319e-10	9.213e-10	6.79842e-10	3.09566e-12	1.10784e-13	2.46051e-08	8.89837e-09	2.36384e-11	1.26284e-11	1.64883e-11	7.06526e-12	7.77992e-10	3.40941e-10	9.52869e-14	7.21113e-16	1.62149e-13	1.19996e-13
2044	2.06196e-09	1.13175e-09	5.56575e-11	1.95964e-11	8.81306e-09	2.29706e-10	8.59675e-10	6.24446e-10	3.10918e-12	9.33828e-14	2.39583e-08	8.82064e-09	2.16579e-11	1.12411e-11	1.68615e-11	7.88144e-12	8.00342e-10	3.58703e-10	9.30956e-14	7.38e-16	1.86702e-13	1.46295e-13
2045	2.10458e-09	1.13712e-09	5.52496e-11	1.95546e-11	8.80676e-09	2.58112e-10	8.23429e-10	6.093e-10	3.01713e-12	1.27854e-13	2.44669e-08	9.05078e-09	2.31125e-11	1.32064e-11	1.677e-11	7.81326e-12	8.18279e-10	3.64356e-10	9.09044e-14	7.58978e-16	2.06229e-13	1.69182e-13
2046	2.08883e-09	1.14818e-09	5.48418e-11	1.95133e-11	8.79576e-09	2.38953e-10	1.01656e-09	9.25138e-10	3.02395e-12	1.3923e-13	2.54007e-08	8.87245e-09	2.55005e-11	1.41545e-11	1.6909e-11	7.58003e-12	8.07725e-10	3.53437e-10	8.87132e-14	7.83719e-16	1.79932e-13	1.16127e-13
2047	2.18199e-09	1.11375e-09	5.44355e-11	1.94705e-11	8.80615e-09	2.44723e-10	8.30168e-10	5.56566e-10	3.03375e-12	1.01894e-13	2.49653e-08	8.8826e-09	2.61578e-11	1.59878e-11	1.71272e-11	7.94517e-12	7.98458e-10	3.5224e-10	8.6522e-14	8.11877e-16	2.36423e-13	1.38872e-13
2048	2.27684e-09	1.15489e-09	5.41225e-11	1.93782e-11	8.76322e-09	2.51187e-10	1.27371e-09	1.55573e-09	2.99881e-12	1.15447e-13	2.52911e-08	8.94677e-09	2.51546e-11	1.32641e-11	1.69512e-11	7.67199e-12	8.18993e-10	3.52119e-10	8.43308e-14	8.43112e-16	2.50042e-13	1.72e-13
2049	2.264e-09	1.13229e-09	5.38125e-11	1.92831e-11	8.74052e-09	2.38956e-10	8.31384e-10	6.19627e-10	2.9421e-12	1.36218e-13	2.51765e-08	8.89608e-09	2.59097e-11	1.35819e-11	1.68247e-11	8.08884e-12	7.81788e-10	3.49612e-10	8.21395e-14	8.77093e-16	1.65368e-13	1.27569e-13
2050	2.14834e-09	1.03959e-09	5.35025e-11	1.91887e-11	8.73581e-09	2.44698e-10	1.06681e-09	1.0218e-09	3.12503e-12	1.86995e-13	2.48505e-08	8.91635e-09	2.47269e-11	1.34857e-11	1.73065e-11	7.79432e-12	7.91491e-10	3.4279e-10	7.99483e-14	9.13516e-16	1.59173e-13	1.11686e-13

## Sheet: SC3-b
kg m-2 s-1	Release from tree tiles		Release from grass tiles		Urban domestic water		Release from litter		Loss to subsurface runoff		N loss from terrestrial respiration		N added for cropland fertilisation		Soil loss		Mass flux into atmosphere		Dry and wet deposition		Biological nitrogen fixation
	Median	Standard deviation	Median	Standard deviation	Median	Standard deviation	Median	Standard deviation	Median	Standard deviation	Median	Standard deviation	Median	Standard deviation	Median	Standard deviation	Median	Standard deviation	Median	Standard deviation	Median	Standard deviation
2015	1.88622e-09	1.0442e-09	6.73668e-11	2.07427e-11	8.51633e-09	2.14163e-10	1.1894e-09	1.21069e-09	4.4737e-12	2.32473e-13	2.16501e-08	8.08654e-09	2.03345e-11	1.09304e-11	1.57515e-11	7.57457e-12	7.09857e-10	3.17766e-10	1.83885e-13	3.90255e-15	2.61633e-13	1.90475e-13
2016	1.96119e-09	1.07893e-09	6.7532e-11	2.05305e-11	8.62708e-09	2.46952e-10	9.47372e-10	9.23006e-10	4.30055e-12	1.88312e-13	2.11995e-08	7.97727e-09	1.86024e-11	8.83614e-12	1.54164e-11	7.6611e-12	7.41203e-10	3.3933e-10	1.83152e-13	3.86961e-15	1.89531e-13	9.65056e-14
2017	1.96313e-09	1.02125e-09	6.75251e-11	2.05397e-11	8.59619e-09	2.28421e-10	7.7891e-10	6.20385e-10	4.27714e-12	2.08317e-13	2.1023e-08	7.86996e-09	2.00653e-11	9.80803e-12	1.54724e-11	7.51519e-12	7.16125e-10	3.03672e-10	1.82419e-13	3.83673e-15	3.53154e-13	1.28817e-13
2018	1.98788e-09	1.05984e-09	6.75929e-11	2.08492e-11	8.6343e-09	2.23532e-10	7.98049e-10	6.08819e-10	4.3516e-12	1.58252e-13	2.13729e-08	8.0654e-09	2.01617e-11	1.04749e-11	1.54508e-11	6.83375e-12	7.12956e-10	3.13336e-10	1.81685e-13	3.80391e-15	3.79364e-13	2.01952e-13
2019	2.06156e-09	1.23659e-09	7.0021e-11	2.03269e-11	8.59709e-09	2.42116e-10	9.51988e-10	6.91243e-10	4.33592e-12	1.45582e-13	2.26703e-08	7.86589e-09	2.19661e-11	1.11896e-11	1.72573e-11	7.6883e-12	8.31215e-10	3.32573e-10	1.80515e-13	3.50503e-15	5.27965e-13	2.85207e-13
2020	1.98788e-09	1.05984e-09	6.77309e-11	2.14685e-11	8.67037e-09	2.36297e-10	1.53084e-09	1.83332e-09	4.26789e-12	1.77839e-13	2.18897e-08	8.13051e-09	2.09839e-11	1.12724e-11	1.54297e-11	7.62192e-12	7.32705e-10	3.4472e-10	1.80219e-13	3.73842e-15	4.58903e-13	1.70078e-13
2021	2.06156e-09	1.23659e-09	6.77999e-11	2.17798e-11	8.66065e-09	2.42151e-10	9.04625e-10	9.46127e-10	4.20982e-12	1.1844e-13	2.19599e-08	8.30593e-09	2.21717e-11	1.20418e-11	1.56434e-11	7.13973e-12	6.94482e-10	3.37107e-10	1.79903e-13	3.62225e-15	3.43937e-13	2.25353e-13
2022	2.05771e-09	1.15343e-09	6.7883e-11	2.20745e-11	8.67624e-09	2.21931e-10	8.51741e-10	7.07785e-10	4.14955e-12	1.94343e-13	2.19882e-08	7.9554e-09	1.98797e-11	9.71438e-12	1.57013e-11	7.37662e-12	7.40244e-10	3.3019e-10	1.79587e-13	3.50626e-15	3.07077e-13	1.36653e-13
2023	2.07958e-09	1.13508e-09	6.83407e-11	2.21597e-11	8.6943e-09	2.3594e-10	7.79029e-10	5.74024e-10	4.1799e-12	1.14829e-13	2.15789e-08	8.16874e-09	2.12598e-11	1.1867e-11	1.63613e-11	7.41089e-12	7.50348e-10	3.43922e-10	1.79271e-13	3.3905e-15	2.55859e-13	1.27535e-13
2024	2.08835e-09	1.16264e-09	6.87982e-11	2.22478e-11	8.66224e-09	2.3401e-10	1.08166e-09	1.02165e-09	4.0491e-12	8.77606e-14	2.241e-08	8.467e-09	2.06216e-11	1.00042e-11	1.61248e-11	7.97764e-12	7.29864e-10	3.40317e-10	1.78955e-13	3.27497e-15	2.88823e-13	1.35023e-13
2025	2.02897e-09	1.10273e-09	6.92557e-11	2.23385e-11	8.66375e-09	2.37196e-10	1.08226e-09	1.09947e-09	3.96968e-12	1.55767e-13	2.27061e-08	8.34987e-09	2.16902e-11	1.20603e-11	1.57241e-11	7.49861e-12	7.24317e-10	3.23972e-10	1.78639e-13	3.1597e-15	2.32106e-13	1.39695e-13
2026	1.98958e-09	1.04073e-09	6.97132e-11	2.24316e-11	8.69455e-09	2.33966e-10	8.02591e-10	5.91016e-10	3.92134e-12	1.3849e-13	2.22918e-08	8.23512e-09	2.23596e-11	1.30723e-11	1.64436e-11	8.20698e-12	7.41042e-10	3.52024e-10	1.78323e-13	3.04473e-15	2.47639e-13	1.74598e-13
2027	2.03036e-09	1.10462e-09	7.01613e-11	2.25392e-11	8.62347e-09	2.467e-10	9.74894e-10	9.47062e-10	3.90098e-12	1.0337e-13	2.27334e-08	8.43824e-09	2.31374e-11	1.30577e-11	1.61289e-11	7.90426e-12	7.49947e-10	3.53847e-10	1.78007e-13	2.93009e-15	1.72614e-13	1.07935e-13
2028	2.15214e-09	1.12365e-09	7.01675e-11	2.25976e-11	8.59539e-09	2.39021e-10	8.26511e-10	6.03109e-10	3.8516e-12	1.62804e-13	2.29566e-08	8.4664e-09	2.17288e-11	1.12877e-11	1.58563e-11	7.46798e-12	7.35502e-10	3.09187e-10	1.77691e-13	2.81581e-15	2.43041e-13	8.36116e-14
2029	2.15784e-09	1.22186e-09	7.01702e-11	2.26618e-11	8.69322e-09	2.31684e-10	1.05175e-09	9.68563e-10	3.94736e-12	1.16892e-13	2.28688e-08	8.68662e-09	1.96622e-11	1.00829e-11	1.61815e-11	7.90742e-12	7.90728e-10	3.51527e-10	1.77375e-13	2.70195e-15	2.45007e-13	1.11549e-13
2030	2.09505e-09	1.15931e-09	7.01729e-11	2.27274e-11	8.69733e-09	2.37749e-10	1.21923e-09	1.23007e-09	3.73682e-12	1.04174e-13	2.32282e-08	8.30611e-09	2.25036e-11	1.40848e-11	1.73683e-11	8.43578e-12	7.51786e-10	3.58536e-10	1.77059e-13	2.5886e-15	2.29829e-13	1.377e-13
2031	2.05463e-09	1.10261e-09	7.01755e-11	2.27944e-11	8.69215e-09	2.39689e-10	8.88262e-10	7.17614e-10	3.74895e-12	9.47373e-14	2.30494e-08	8.20944e-09	2.33855e-11	1.34187e-11	1.60747e-11	7.50367e-12	7.50064e-10	3.34513e-10	1.74324e-13	2.49278e-15	2.36192e-13	1.34813e-13
2032	2.02275e-09	1.11624e-09	7.01785e-11	2.28623e-11	8.72232e-09	2.41627e-10	8.57858e-10	6.31536e-10	3.74035e-12	7.82503e-14	2.31674e-08	8.79238e-09	2.25189e-11	1.35085e-11	1.59161e-11	7.88636e-12	7.57058e-10	3.30823e-10	1.71589e-13	2.39717e-15	2.40213e-13	1.94921e-13
2033	2.09788e-09	1.1779e-09	7.00092e-11	2.30006e-11	8.7491e-09	2.49586e-10	2.25227e-09	2.7262e-09	3.68683e-12	1.03059e-13	2.39541e-08	8.60998e-09	2.317e-11	1.33611e-11	1.60533e-11	7.60111e-12	7.81205e-10	3.77292e-10	1.68854e-13	2.30178e-15	1.97407e-13	1.14558e-13
2034	2.06147e-09	1.06787e-09	6.98403e-11	2.31399e-11	8.71136e-09	2.47614e-10	8.37622e-10	6.47153e-10	3.64422e-12	1.31615e-13	2.44864e-08	8.4467e-09	2.33986e-11	1.17736e-11	1.70927e-11	8.22715e-12	7.75042e-10	3.01549e-10	1.6612e-13	2.20663e-15	2.17724e-13	7.91278e-14
2035	2.14195e-09	1.09222e-09	6.96713e-11	2.32804e-11	8.69855e-09	2.37582e-10	8.57802e-10	6.28614e-10	3.64056e-12	1.1136e-13	2.38385e-08	8.67754e-09	2.06453e-11	1.03693e-11	1.6292e-11	8.02582e-12	8.22097e-10	3.54695e-10	1.63385e-13	2.11175e-15	4.24189e-13	1.65622e-13
2036	2.12038e-09	1.10412e-09	6.95024e-11	2.34223e-11	8.69569e-09	2.41779e-10	9.9792e-10	7.66885e-10	3.5668e-12	1.49404e-13	2.39401e-08	8.80769e-09	2.23756e-11	1.25283e-11	1.7381e-11	8.20219e-12	7.84123e-10	3.5565e-10	1.6065e-13	2.01719e-15	2.28315e-13	1.38657e-13
2037	2.11787e-09	1.12319e-09	6.93331e-11	2.3566e-11	8.74812e-09	2.36618e-10	8.72439e-10	6.43221e-10	3.62961e-12	1.21213e-13	2.39739e-08	8.61143e-09	2.53856e-11	1.62507e-11	1.69625e-11	8.01181e-12	7.51498e-10	3.51801e-10	1.57915e-13	1.92298e-15	2.33591e-13	1.21039e-13
2038	2.13793e-09	1.15177e-09	6.9078e-11	2.34217e-11	8.70443e-09	2.45374e-10	9.05118e-10	6.04598e-10	3.6357e-12	7.38749e-14	2.40281e-08	8.7756e-09	2.32094e-11	1.3277e-11	1.68854e-11	8.04656e-12	7.77766e-10	3.57074e-10	1.55181e-13	1.82919e-15	2.13113e-13	1.19776e-13
2039	2.20039e-09	1.05941e-09	6.88226e-11	2.32784e-11	8.72894e-09	2.43924e-10	1.5451e-09	1.97482e-09	3.61614e-12	1.10281e-13	2.41381e-08	8.85857e-09	2.41737e-11	1.51881e-11	1.65655e-11	8.2686e-12	7.80149e-10	3.6149e-10	1.52446e-13	1.73589e-15	2.00166e-13	1.29407e-13
2040	2.22081e-09	1.18463e-09	6.85672e-11	2.31358e-11	8.75118e-09	2.34568e-10	8.71629e-10	6.45263e-10	3.39249e-12	1.19995e-13	2.47184e-08	8.6941e-09	2.39093e-11	1.45756e-11	1.6663e-11	7.9086e-12	8.2566e-10	3.41603e-10	1.49711e-13	1.64313e-15	2.65431e-13	1.6962e-13
2041	2.22685e-09	1.24953e-09	6.83118e-11	2.29938e-11	8.78103e-09	2.50749e-10	1.25157e-09	1.2907e-09	3.48577e-12	8.72496e-14	2.39089e-08	8.99929e-09	2.45204e-11	1.58549e-11	1.6812e-11	7.99578e-12	8.29081e-10	3.41082e-10	1.47367e-13	1.58301e-15	2.28515e-13	1.29523e-13
2042	2.23271e-09	1.22915e-09	6.80554e-11	2.28539e-11	8.78136e-09	2.403e-10	9.38471e-10	6.40181e-10	3.48264e-12	8.19318e-14	2.46092e-08	8.90886e-09	2.5441e-11	1.69794e-11	1.78838e-11	8.59405e-12	8.02407e-10	3.56275e-10	1.45023e-13	1.52309e-15	2.06397e-13	7.5473e-14
2043	2.20214e-09	1.16644e-09	6.77323e-11	2.28769e-11	8.82277e-09	2.46206e-10	1.54815e-09	2.06281e-09	3.43252e-12	9.3181e-14	2.48225e-08	8.93853e-09	2.3024e-11	1.26172e-11	1.72169e-11	8.11344e-12	7.81998e-10	3.91141e-10	1.42678e-13	1.4634e-15	1.73249e-13	6.9284e-14
2044	2.11154e-09	1.18315e-09	6.74097e-11	2.29014e-11	8.76911e-09	2.44715e-10	1.69889e-09	1.84135e-09	3.4152e-12	1.20756e-13	2.49145e-08	9.1489e-09	2.39579e-11	1.57248e-11	1.69354e-11	7.89035e-12	7.92007e-10	3.77086e-10	1.40334e-13	1.40397e-15	2.69886e-13	9.66685e-14
2045	2.22666e-09	1.11696e-09	6.70871e-11	2.2928e-11	8.77511e-09	2.3933e-10	1.49216e-09	1.83925e-09	3.40428e-12	8.70984e-14	2.51649e-08	9.22098e-09	2.83341e-11	1.75792e-11	1.76187e-11	8.48815e-12	7.74073e-10	3.52158e-10	1.3799e-13	1.34483e-15	4.08125e-13	2.12837e-13
2046	2.22589e-09	1.21377e-09	6.67645e-11	2.29567e-11	8.75272e-09	2.47915e-10	1.05266e-09	9.52744e-10	3.43878e-12	1.24775e-13	2.54136e-08	9.57198e-09	2.26532e-11	1.28708e-11	1.71321e-11	8.33167e-12	8.11292e-10	3.55191e-10	1.35645e-13	1.28603e-15	4.25464e-13	1.35391e-13
2047	2.29574e-09	1.07029e-09	6.64405e-11	2.29893e-11	8.72296e-09	2.35847e-10	2.10039e-09	2.7814e-09	3.44223e-12	1.03066e-13	2.57683e-08	9.54687e-09	2.51884e-11	1.45753e-11	1.74751e-11	7.87323e-12	7.98079e-10	3.50814e-10	1.33301e-13	1.22761e-15	5.21969e-13	1.42018e-13
2048	2.27316e-09	1.13087e-09	6.5897e-11	2.28471e-11	8.73255e-09	2.36386e-10	8.59507e-10	6.06094e-10	3.42322e-12	1.24647e-13	2.52864e-08	9.48723e-09	2.3154e-11	1.23283e-11	1.83175e-11	8.42748e-12	8.14631e-10	3.52829e-10	1.30957e-13	1.16964e-15	4.54234e-13	1.37228e-13
2049	2.19888e-09	1.19681e-09	6.53509e-11	2.27091e-11	8.73972e-09	2.62088e-10	1.65333e-09	2.06822e-09	3.45783e-12	1.15844e-13	2.57509e-08	9.46884e-09	2.1928e-11	1.36087e-11	1.80723e-11	8.25683e-12	8.05987e-10	3.36425e-10	1.28613e-13	1.11217e-15	3.47334e-13	9.36383e-14
2050	2.19695e-09	1.19652e-09	6.48047e-11	2.25719e-11	8.71904e-09	2.37124e-10	1.42036e-09	1.52734e-09	3.28862e-12	1.18089e-13	2.54455e-08	9.62617e-09	2.56308e-11	1.55893e-11	1.72942e-11	8.45511e-12	8.01347e-10	3.73308e-10	1.26268e-13	1.05528e-15	2.72762e-13	1.28809e-13

[truncated: 6 more sheets: SC3-c, SC3-d, SC4, SC5-a, SC5-b, SC5-c]
